# Supplementary material for: Association between earthquake experience and depression 37 years after the Tangshan earthquake: a cross-sectional study
Source: PubMed Central journal article supplement — BMJ Open. 2019 Aug 20;9(8):e026110. doi: 10.1136/bmjopen-2018-026110 (PMC6707697; doi:10.1136/bmjopen-2018-026110), 2019-08-20
Supplement: bmjopen-2018-026110.draft_revisions.pdf [file bmjopen-2018-026110.draft_revisions.pdf]

# BMJ Open

BMJ Open is committed to open peer review. As part of this commitment we make the peer review history of every article we publish publicly available.

When an article is published we post the peer reviewers' comments and the authors' responses online. We also post the versions of the paper that were used during peer review. These are the versions that the peer review comments apply to.

The versions of the paper that follow are the versions that were submitted during the peer review process. They are not the versions of record or the final published versions. They should not be cited or distributed as the published version of this manuscript.

BMJ Open is an open access journal and the full, final, typeset and author-corrected version of record of the manuscript is available on our site with no access controls, subscription charges or pay-per-view fees (<http://bmjopen.bmj.com>).

If you have any questions on BMJ Open's open peer review process please email [info.bmjopen@bmj.com](mailto:info.bmjopen@bmj.com)

# BMJ Open

## Association between Earthquake and Depression 37 Years after the Tangshan Earthquake: a Community-based Study

|                               |                                                                                                                                                                                                                                                                                                                                                                                                                                                                                                                                                                                                                                                                                                                                                                                                                                                                                                                                                                                                                                                                                                                                                                                 |
|-------------------------------|---------------------------------------------------------------------------------------------------------------------------------------------------------------------------------------------------------------------------------------------------------------------------------------------------------------------------------------------------------------------------------------------------------------------------------------------------------------------------------------------------------------------------------------------------------------------------------------------------------------------------------------------------------------------------------------------------------------------------------------------------------------------------------------------------------------------------------------------------------------------------------------------------------------------------------------------------------------------------------------------------------------------------------------------------------------------------------------------------------------------------------------------------------------------------------|
| Journal:                      | <i>BMJ Open</i>                                                                                                                                                                                                                                                                                                                                                                                                                                                                                                                                                                                                                                                                                                                                                                                                                                                                                                                                                                                                                                                                                                                                                                 |
| Manuscript ID                 | bmjopen-2018-026110                                                                                                                                                                                                                                                                                                                                                                                                                                                                                                                                                                                                                                                                                                                                                                                                                                                                                                                                                                                                                                                                                                                                                             |
| Article Type:                 | Research                                                                                                                                                                                                                                                                                                                                                                                                                                                                                                                                                                                                                                                                                                                                                                                                                                                                                                                                                                                                                                                                                                                                                                        |
| Date Submitted by the Author: | 23-Aug-2018                                                                                                                                                                                                                                                                                                                                                                                                                                                                                                                                                                                                                                                                                                                                                                                                                                                                                                                                                                                                                                                                                                                                                                     |
| Complete List of Authors:     | Gao, Xing; Chinese Academy of Medical science, Institute of Medical Information<br>Leng, Yue; Global Brain Health Institute , Department of Psychiatry, University of California<br>Guo, Yuchen; Chinese Academy of Medical Science, Institute of Medical Information<br>Yang, Jichun; Department of Physiology and Pathophysiology, School of Basic Medical Sciences Key Laboratory of Molecular Cardiovascular Science of the Ministry of Education Center for Non-coding RNA Medicine Peking University Health Science Center<br>Cui, Qinghua; Department of Biomedical Informatics, School of Basic Medical Sciences Key Laboratory of Molecular Cardiovascular Science of the Ministry of Education Center for Non-coding RNA Medicine Peking University Health Science Center<br>Geng, Bin ; Hypertension Center, Fuwai Hospital, Chinese Academy of Medical Sciences and Peking Union Medical College, State Key Laboratory of Cardiovascular Disease<br>Hu, Hongpu; Chinese Academy of Medical science, Institute of Medical Information<br>zhou, Yong; Beijing Institute of Heart, Lung and Blood Vessel Diseases ,Beijing Anzhen Hospital, Capital Medical University |
| Keywords:                     | Depression & mood disorders < PSYCHIATRY, Earthquake, Association, EPIDEMIOLOGY                                                                                                                                                                                                                                                                                                                                                                                                                                                                                                                                                                                                                                                                                                                                                                                                                                                                                                                                                                                                                                                                                                 |
|                               |                                                                                                                                                                                                                                                                                                                                                                                                                                                                                                                                                                                                                                                                                                                                                                                                                                                                                                                                                                                                                                                                                                                                                                                 |

SCHOLARONE™  
Manuscripts

1  
2  
3 **Association between Earthquake and Depression 37 Years after the Tangshan Earthquake: a**  
4  
5

6 **Community-based Study**

7 Xing Gao<sup>1</sup>, Yue Leng<sup>2</sup>, Yuchen Guo<sup>1</sup>, Jichun Yang<sup>3</sup>, Qinghua Cui<sup>3</sup>, Bin Geng<sup>4</sup>, Hongpu Hu<sup>1</sup>, Yong  
8 Zhou<sup>5</sup>  
9  
10

11  
12  
13  
14  
15 **Corresponding Author**

16 1 Hong-Pu Hu, MD, PhD

17  
18 Professor of Institute of Medical Information, Chinese Academy of Medical Sciences, Beijing

19  
20 Address: Yabao Road 3, CN-100020 Beijing, China

21  
22 Tel/Fax: 86-10-52328610/86-10-52328870

23  
24 Email: hu.hongpu@imicams.ac.cn

25  
26 2 Yong Zhou, MD, PhD

27  
28 Associate Research Fellow

29  
30 Beijing Institute of Heart, Lung and Blood Vessel Diseases, Beijing Anzhen Hospital, Capital Medical

31  
32 University, Beijing

33  
34 Address: Anzhen road 2, CN-100029 Beijing, China

35  
36 Tel/Fax: 86-10-64456462

37  
38 Email: yongzhou78214@163.com  
39  
40  
41  
42

43  
44  
45 **Authors' Affiliation**

46 1 Institute of Medical Information, Chinese Academy of Medical Sciences, Beijing, P.R. China

47 2 Global Brain Health Institute, Department of Psychiatry, University of California, San Francisco,

48  
49 USA  
50  
51

1  
2  
3 Department of Physiology and Pathophysiology, School of Basic Medical Sciences, Key Laboratory  
4 of Molecular Cardiovascular Science of the Ministry of Education Center for Non-coding RNA  
5 Medicine, Peking University Health Science Center, Beijing, P.R. China  
6

7  
8 4 Hypertension Center, Fuwai Hospital, Chinese Academy of Medical Sciences and Peking Union  
9 Medical College, State Key Laboratory of Cardiovascular Disease, Beijing, P.R. China  
10

11  
12  
13 5 Beijing Institute of Heart, Lung and Blood Vessel Diseases, Beijing Anzhen Hospital, Capital  
14 Medical University, Beijing, P.R. China  
15

16  
17  
18 **Co-first author**  
19

20  
21 Yue Leng, M.Phil, PhD  
22

23 Atlantic Fellow, Global Brain Health Institute, Department of Psychiatry, University of California,  
24

25  
26 San Francisco, USA  
27  
28  
29  
30

31 **Word count: 2233**  
32  
33  
34  
35  
36  
37  
38  
39  
40  
41  
42  
43  
44  
45  
46  
47  
48  
49  
50  
51  
52  
53  
54  
55  
56  
57  
58  
59  
60

**ABSTRACT**

**Objective** To investigate the association between a major earthquake, the Tangshan earthquake, and the risk of depression over 37 years.

**Design and setting** Prospective, population-based cohort study conducted in Tangshan from 2013 to 2014.

**Participants** This general community sample included 5024 participants who were born before July 28, 1976, when the Tangshan earthquake occurred, with available data on their earthquake experiences and depression 37 years after the earthquake.

**Outcomes and variables** ORs for having earthquake experience with or without bereavement (relative to no earthquake experience) obtained by multinomial logistic regression, adjusted for gender, age during the earthquake, marital status, smoking, drinking, education, income, residence in Tangshan 1-2 years after the earthquake, hypertension, diabetes, and dyslipidemia.

**Results** Of the 5024 participants, 641 experienced the Tangshan earthquake, and 98 experienced bereavement. Participants who experienced the earthquake (with or without bereavement) were 83% (odds ratios (OR) 1.83, 95% confidence interval (CI) 1.02-3.29) more likely to develop depression after 37 years. Those who lost relatives after the earthquake were nearly 3 times (OR 2.82, 95% CI 1.24-6.39) as likely to develop depression as those who did not experience the earthquake. The association was more pronounced for women: women who experienced the earthquake with or without bereavement were more than 3 times as likely to develop depression, whereas no significant association was found for men (interaction by gender  $p=0.02$ ).

**Conclusions** The Tangshan earthquake is associated with an increased long-term risk of depression in survivors who experienced bereavement, particularly women. Our findings suggest a need for long-term surveillance of depression and early intervention among survivors of major earthquakes.

### Strengths and limitations of this study

- This is the first study to show long-term risk of depression 37 years following an earthquake.
- Participants are stratified by gender and age at the earthquake, which is necessary for clinicians and policymakers to identify high-risk populations for long-term prevention of depression after an earthquake.
- We were unable to control for every event or factor during the follow-up.
- Whether the subjects were taking antidepressants was unknown.
- Depression was assessed only once during the study.

## INTRODUCTION

The prevalence of depression is increasing worldwide[1]. According to the World Health Organization, depression will be a major reason for disability around the world by 2030[2]. Therefore, it is critical to identify populations at high risk of depression.

In recent years, an increasing number of studies have suggested that earthquakes are closely related to the development of mental illnesses, including post-traumatic stress disorder (PTSD), depression and anxiety[3-6]. In particular, several studies have indicated an increased prevalence of depression among individuals who survived a major earthquake[7, 8]. Moreover, survivors who lost relatives and vulnerable individuals, such as women and the elderly, during the earthquake were particularly affected[9, 10]. However, these studies mainly examined the effects of earthquakes on depression in the short-term. It was unclear whether the increased risk of depression persisted over a long period following the earthquakes. Depression is chronic and debilitating[11], and the long-term effects of an earthquake on depression may result in chronic psychological disorders[12, 13]. The likelihood of developing a long-term psychiatric disorder may be reduced if effective treatment can be implemented among the population that needs it most before the disorder becomes entrenched[14].

These long-term effects are difficult to establish due to the scarcity of information concerning the present health status of survivors, which is due to the high cost and difficulty of tracking individuals over time[15]. In China, the Jidong Cohort, located in Tangshan, provides a suitable setting for studying the long-term effect of an earthquake on depression. The Tangshan earthquake, which

1  
2  
3 occurred in 1976, had a magnitude of 7.8 on the Richter scale[16]. Over the past 37 years, numerous  
4  
5 studies have examined the effects of the Tangshan earthquake on physical health outcomes. These  
6  
7 studies suggested an increased risk of diabetes, cardiovascular disease, and elevated levels of uric acid  
8  
9 among survivors of the Tangshan earthquake even more than 30 years later[17-19]. However, no study  
10  
11 to date has examined the long-term effect of Tangshan earthquake on the risk of depression. Given the  
12  
13 high morbidity and additional complications of depression, it is important to identify the high-risk  
14  
15 group to provide evidence for psychological intervention in the vulnerable group.  
16  
17  
18  
19  
20  
21  
22  
23

24 The present study aimed to examine whether the Tangshan earthquake increased the rate of depression  
25  
26 37 years later and to study whether those who lost relatives during the earthquake were particularly  
27  
28 affected. We also examined whether the association between the earthquake and depression varies by  
29  
30 gender and age at the time of the earthquake.  
31  
32  
33  
34  
35

## 36 **MATERIALS AND METHODS**

### 37 **Study participants**

38  
39 We used data obtained from the Jidong Cohort, an ongoing community-based study[20]. Jidong is  
40  
41 located in the Caofeidian district of Tangshan City, which is 60 km from the epicenter of the Tangshan  
42  
43 earthquake. From July 2013 to August 2014, a total of 9078 residents of Jidong were recruited for the  
44  
45 study, completed a standardized questionnaire, and underwent physical examinations and laboratory  
46  
47 assessments. We included 5024 participants from the Jidong Cohort; all were born before July 28,  
48  
49 1976, when the earthquake occurred, and provided baseline information on their experiences with the  
50  
51  
52  
53  
54  
55  
56  
57  
58  
59  
60



1  
2  
3 earthquake. This study was conducted in accordance with the guidelines in the Helsinki Declaration  
4  
5  
6 and approved by the Ethics Committee of Jidong Oilfield Staff Hospital. All participants provided  
7  
8  
9 written informed consent.

### 10 11 12 13 **Assessment of the earthquake experience**

14  
15  
16 During the baseline visit, participants reported their earthquake experience and related bereavement  
17  
18 using a standardized questionnaire. Participants were asked “Were you in the Tangshan earthquake  
19  
20 area in 1976?” and “Did you lose any relatives in the earthquake?”. Participants who confirmed that  
21  
22 they had experienced the earthquake were placed into one of 3 groups: no earthquake experience;  
23  
24 earthquake experience without bereavement; and earthquake experience with bereavement.  
25  
26  
27  
28  
29  
30

### 31 **Assessment of depression**

32  
33  
34 Depressive symptoms were assessed using the Center for Epidemiological Studies Depression Scale  
35  
36 (CES-D), which was initially developed by the United States National Institute of Mental Health in  
37  
38 1977[21]. The Chinese version of the CES-D was translated by two psychiatrists on the basis of the  
39  
40 international standard version of the CES-D questionnaire in 1985[22] and was specifically designed  
41  
42 to screen for depression[23]. All investigators attended a 3-day training course and were licensed  
43  
44 before conducting CES-D interviews. The highest possible score on the CES-D scale was 60, and a  
45  
46 score of 16 or higher was used to define clinically meaningful depressive symptoms.  
47  
48  
49  
50  
51

### 52 **Assessment of potential covariates**

53  
54 All demographic and behavioral variables were collected using questionnaires, which were  
55  
56  
57  
58  
59  
60

1  
2  
3 administered by well-trained research nurses. Potential confounding variables included gender, age at  
4  
5  
6 time of earthquake, smoking, drinking, education, income, residence in Tangshan 1-2 years after the  
7  
8  
9 earthquake, hypertension, diabetes, and dyslipidemia. Age at the time of the earthquake was defined as  
10  
11 a continuous variable. The average monthly income of each family member was categorized as  
12  
13 “<¥3000”, “¥3000–5000” or “>¥5,000”. Educational level was categorized as “illiterate or primary  
14  
15 school,” “middle school or high school,” and “university or above.” Possible responses to questions on  
16  
17 smoking status, drinking status were “yes” and “no.” Systolic blood pressure (SBP) and diastolic  
18  
19 blood pressure (DBP) were measured twice with the subject in a seated position using a mercury  
20  
21 sphygmomanometer. If the difference between the two measurements exceeded 5 mm Hg, an  
22  
23 additional reading was taken, and the average of the three readings was used. Hypertension was  
24  
25 defined as having a history of hypertension, exhibiting an SBP  $\geq 140$  mm Hg or a DPB  $\geq 90$  mm Hg, or  
26  
27 using antihypertensive medications. Diabetes mellitus was defined as a fasting glucose level  $\geq 7.0$   
28  
29 mmol/l (126 mg/dl), any use of glucose-lowering drugs, or any self-reported history of diabetes mellitus.  
30  
31  
32  
33  
34  
35  
36  
37  
38  
39  
40  
41  
42  
43  
44  
45  
46  
47  
48  
49  
50  
51  
52  
53  
54  
55  
56  
57  
58  
59  
60

### **Patients and public involvement**

Patients and public did not involve in the design of the study. However, Participants signed written informed consent. They actively cooperated with the researcher to complete the collection of questionnaire information and were willing to provide support for further use of data.

## Statistical analysis

We first compared the baseline characteristics of individuals according to their earthquake and bereavement experiences (no earthquake experience, earthquake experience without bereavement, and earthquake experience with bereavement) using the chi-square test for categorical variables and one-way ANOVA or the Kruskal Wallis test for continuous variables.

We used logistic regression to examine the association between earthquake experience and depression and obtained odds ratios of the development of clinically meaningful depressive symptoms with "no earthquake experience" as the reference group. We adjusted for a number of potential confounders, including gender, age during the earthquake, smoking, drinking, education, income, residence in Tangshan 1-2 years after the earthquake, hypertension, diabetes, and dyslipidemia. To determine whether the association between earthquake and depression varied by gender and age during the earthquake, we also performed a subgroup analysis using these variables and tested for significance of the interaction terms.

All statistical tests were 2-sided, and results with a P-value<0.05 was considered statistically significant. Analyses were implemented in SAS version 9.4 (SAS Institute Inc., Cary, NC, USA).

## RESULTS

### Baseline characteristics

Baseline characteristics of earthquake and bereavement experiences are shown in Table 1. In total, 543 (10.8%) out of 5024 individuals experienced the earthquake without bereavement, and 98 (2.0%)

1  
2  
3 participants lost relatives. Individuals who experienced earthquakes, with or without bereavement,  
4  
5  
6 were younger ( $14.8 \pm 9.2$ ,  $13.1 \pm 9.1$  vs.  $14.8 \pm 9.2$ ) and were more likely to have lived in Tangshan 1-2  
7  
8 years after the earthquake (86.7%, 79.4% vs. 1%) than those who had not experienced earthquakes.  
9  
10  
11 There was no difference in gender, smoking, drinking, education, income, hypertension, diabetes or  
12  
13 dyslipidemia. Compared to those without earthquake experience, there was a higher incidence of  
14  
15 depression in the bereaved and non-bereaved groups (12.2% (39/543) and 7.2% (12/98)) (Figure 1).  
16  
17  
18  
19  
20

### 21 **Association of earthquake experience with depression**

22  
23 Odds ratios (ORs) with 95% confidence intervals (CIs) between earthquake experience and depression  
24  
25 are presented in Table 2. Earthquake experience was significantly associated with depression. The  
26  
27 adjusted OR of the group that had earthquake experience was 1.83 (OR, 1.83; 95% CI, 1.02-3.29) with  
28  
29 respect to that of the group with no earthquake experience. However, when the group with earthquake  
30  
31 experience was divided into bereaved and non-bereaved subgroups, a higher risk of depression was  
32  
33 found only in the bereaved subgroup. As shown in Table 2, the risk of depression in the bereaved  
34  
35 subgroup was 2.82 times (OR, 2.82; 95% CI, 1.24-6.39) that in the group with no earthquake  
36  
37 experience.  
38  
39  
40  
41  
42  
43  
44  
45  
46

### 47 **Subgroup analysis by gender and age during the earthquake**

48  
49 In models stratified by gender, both the bereaved (OR, 3.07; 95% CI, 1.44-6.56) and non-bereaved  
50  
51 (OR, 3.51; 95% CI, 1.21-10.16) subgroups were associated with increased risk of depression in female  
52  
53 subjects. There were significant associations between the earthquake and depression in females but not  
54  
55  
56  
57  
58  
59  
60

1  
2  
3 in males ( $P$  for interaction=0.02). In models stratified by age at the time of the earthquake, we did not  
4  
5  
6 identify any significant interaction between age during the earthquake and depression ( $P$  for  
7  
8 interaction=0.51) (Figure 2).  
9

## 10 11 **Discussion**

12  
13 To our knowledge, this is the first study to prove that earthquake survivors have a higher risk of  
14  
15 developing depressive symptoms than those who did not experience an earthquake, even 37 years  
16  
17 later.  
18  
19

20  
21  
22  
23 These findings extend the current literature, which largely focuses on short-term follow-up with  
24  
25 earthquake survivors. The short-term effects of a disaster on mental health are believed to result from  
26  
27 acute stressors, such as frightening and terrible conditions in the immediate aftermath of traumatic  
28  
29 exposure[7, 24]. In contrast to short-term effects, the long-term effects following different  
30  
31 pathogeneses are referred to as chronic stressors. In most cases, an acute stressor increases the adverse  
32  
33 psychological reaction in the short term but abates in the ensuing period, whereas a chronic stressor  
34  
35 might result in long-standing psychological disorders[24, 25].  
36  
37  
38  
39  
40  
41  
42  
43

44  
45 Our study observed the long-term effects of an earthquake on depression among individuals who  
46  
47 experienced bereavement, suggesting that a loss of family during the earthquake could lead to chronic  
48  
49 stress. Our findings were similar to those obtained in a longitudinal study of an earthquake in Italy  
50  
51 with a 7-year follow-up period, which reported that survivors who were exposed to loss and damage  
52  
53 had an increased risk of negative psychological consequences than those who merely lived in the  
54  
55  
56  
57  
58  
59  
60

1  
2  
3 earthquake zone[26]. These findings demonstrated that the adverse consequences induced by an  
4  
5  
6 earthquake are long-term risk factors that increase the prevalence of mental disorders.  
7  
8  
9

10  
11 Many studies have also assessed specific population groups, particularly women and youth, who are  
12  
13 more vulnerable to earthquakes. Several studies of earthquakes have shown that these vulnerable  
14  
15 populations might be at higher risk of depression[10, 27-29]. Similar results were obtained in the  
16  
17 subgroup analysis of gender in our study, which found that female survivors with or without  
18  
19 bereavement were more affected by an earthquake even 37 years later. However, in the subgroup  
20  
21 analysis of age, the interaction between age during the earthquake and depression was not significant  
22  
23 in the current study, which was probably due to the small size of the subgroups.  
24  
25  
26  
27  
28  
29  
30

31 The results of our study are very relevant to future research on depression in earthquake survivors. For  
32  
33 instance, survivors of earthquakes in Japan, Haiti, and China were all affected by high rates of  
34  
35 depression in the short term. Although these studies varied in ethnicity, severity of earthquake  
36  
37 exposure, consequent degree of damage and demographic characteristics, they had similar general  
38  
39 characteristics and traumatic experiences, which could have contributed to long-lasting adverse  
40  
41 psychological outcomes.  
42  
43  
44  
45  
46  
47  
48

49 Our study had a few limitations. First, the study was conducted over a long period, and we were  
50  
51 unable to control for every event or factor during the follow-up. For example, we did not consider  
52  
53 other traumatic events, such as traffic accidents, economic crises or floods, which might also result in  
54  
55  
56  
57

1  
2  
3 depression. Additionally, whether the subjects were taking antidepressants was unknown. Finally,  
4  
5  
6 depression was assessed only once during the study, and therefore, we could not exclude the  
7  
8 possibility of reverse causality. However, it was unlikely that people who experienced an earthquake  
9  
10 were more likely to be depressed prior to the earthquake.  
11

12  
13 This study suggests that the effect of an earthquake on depression remains for 37 years and helps  
14  
15 identify individuals who are prone to depression. It should be noted that depression can cause a series  
16  
17 of physiological disorders, exacerbate diseases and disabilities, and even result in suicide[11, 30, 31].  
18  
19 Therefore, long-term depression could result in higher prevalence of physical morbidity and mortality.  
20  
21 Clinicians and policymakers in public health should pay more attention to survivors who are likely to  
22  
23 develop long-term depression because they may obtain benefit from early intervention policies and  
24  
25 strategies.  
26  
27  
28  
29  
30  
31  
32  
33

### 34 **Conclusions**

35  
36 In summary, having experienced an earthquake increases the risk of depression and has long-lasting  
37  
38 effects on depression in bereaved survivors, particularly women, after the earthquake. Future studies  
39  
40 are required to examine the underlying mechanisms of the association between an earthquake and  
41  
42 development of depression in the long term. Survivors of major earthquakes need to be monitored  
43  
44 carefully and continuously for mental health symptoms. Early intervention should be considered to  
45  
46 prevent the development of depression in these populations.  
47  
48  
49  
50  
51  
52  
53  
54  
55  
56  
57  
58  
59  
60

**Acknowledgments** We thank all the participants, their relatives and the members of the survey team in Jidong community. We also appreciate the help and support of the staff of Ruike Donghua Co., Ltd.

**Contributors** All authors have been involved from the beginning in all phase of the study. XG, YZ and HPH designed the study. XG and YL analyzed the data and prepared the manuscript. JCY, QHC and BG critiqued the manuscript for important intellectual content. XG and YCG conducted the statistical analysis. All authors have read and approved the final version of this manuscript.

**Funding** This work was supported by National Natural Science Foundation (No. 81473057, No.81202279), National Social Science Fund (No.17BGL184) and Central-level non-profit scientific research institutes of basic projects of China (No.2017PT63009).

**Competing interests** None declared.

**Patient consent** Obtained

**Ethics approval** Ethics Committee of Jidong Oilfield Staff Hospital

**Provenance and peer review** Not commissioned; externally peer reviewed

**Data sharing statement** The data used or analyzed during the current study are available from the corresponding author on reasonable request.

**Open access** This is an open access article distributed in accordance with the Creative Commons Attribution 4.0 Unported (CC BY 4.0) license, which permits others to copy, redistribute, remix,



1  
2  
3  
4  
5  
6  
7  
8  
9  
10  
11  
12  
13  
14  
15  
16  
17  
18  
19  
20  
21  
22  
23  
24  
25  
26  
27  
28  
29  
30  
31  
32  
33  
34  
35  
36  
37  
38  
39  
40  
41  
42  
43  
44  
45  
46  
47  
48  
49  
50  
51  
52  
53  
54  
55  
56  
57  
58  
59  
60

transform and build upon this work for any purpose, provided the original work is properly cited, a link to the licence is given, and indication of whether changes were made.

See: <https://creativecommons.org/licenses/by/4.0/>.

---

For peer review only

**TABLE 1** Baseline characteristics according to earthquake experience

| <b>Characteristic</b>                              | <b>Overall</b> | <b>No experience<br/>(n=4383)</b> | <b>Experience without<br/>bereavement (n= 543)</b> | <b>Experience with<br/>bereavement (n= 98)</b> | <b><i>P Value</i></b> |
|----------------------------------------------------|----------------|-----------------------------------|----------------------------------------------------|------------------------------------------------|-----------------------|
| Men, No. (%)                                       | 2524(50.2)     | 2210(50.4)                        | 276(50.8)                                          | 38(38.8)                                       | .07                   |
| Age at the time of the<br>earthquake, mean (SD), y | 14.6(9.2)      | 14.8(9.2)                         | 13.1(9.1)                                          | 12.1(9.0)                                      | <.001                 |
| Smoking, No. (%)                                   | 1286(25.6)     | 1136(25.9)                        | 132(24.3)                                          | 18(18.4)                                       | .18                   |
| Drinking, No. (%)                                  | 1578(31.4)     | 1364(31.1)                        | 186(34.3)                                          | 28(28.6)                                       | .28                   |
| Education, No. (%)                                 |                |                                   |                                                    |                                                | .69                   |
| Illiterate/primary school                          | 318(6.3)       | 279(6.4)                          | 31(5.7)                                            | 8(8.2)                                         |                       |
| Middle/high school                                 | 2704(53.8)     | 2370(54.1)                        | 282(51.9)                                          | 52(53.1)                                       |                       |
| University or above                                | 2002(39.9)     | 1734(39.6)                        | 230(42.4)                                          | 38(38.8)                                       |                       |
| Income, No. (%)                                    |                |                                   |                                                    |                                                | .13                   |
| <=3000                                             | 2415(48.1)     | 2087(47.6)                        | 270(49.7)                                          | 58(59.2)                                       |                       |
| 3001-5000                                          | 2278(45.3)     | 2002(45.7)                        | 243(44.8)                                          | 33(33.7)                                       |                       |
| >5000                                              | 331(6.6)       | 294(6.7)                          | 30(5.5)                                            | 7(7.1)                                         |                       |
| <b>Characteristic</b>                              | <b>Overall</b> | <b>No experience</b>              | <b>Experience without</b>                          | <b>Experience with</b>                         | <b><i>P Value</i></b> |

|                                                                  |            | <b>(n=4383 )</b> | <b>bereavement (n= 543 )</b> | <b>bereavement (n= 98 )</b> |       |
|------------------------------------------------------------------|------------|------------------|------------------------------|-----------------------------|-------|
| Residence in Tangshan 1-2 years<br>after the earthquake, No. (%) | 561(11.2)  | 45(1.0)          | 431(79.4)                    | 85(86.7)                    | <.001 |
| Hypertension, No. (%)                                            | 2158(43.0) | 1872(42.7)       | 237(43.7)                    | 45(45.9)                    | .46   |
| Diabetes, No. (%)                                                | 550(11.0)  | 497(11.3)        | 43(7.9)                      | 10(10.2)                    | .05   |
| Dyslipidemia, No. (%)                                            | 3102(61.7) | 2696(61.5)       | 343(63.2)                    | 63(64.3)                    | .66   |
| Depression, No. (%)                                              | 266(5.3)   | 215(4.9)         | 39(7.2)                      | 12(12.2)                    | <.001 |

For peer review only

1  
2  
3  
4  
5  
6  
7  
8  
9  
10  
11  
12  
13  
14  
15  
16  
17  
18  
19  
20  
21  
22  
23  
24  
25  
26  
27  
28  
29  
30  
31  
32  
33  
34  
35  
36  
37  
38  
39  
40  
41  
42  
43  
44  
45  
46  
47

**Table 2. Association of Earthquake Experience with Depression**

| Characteristic           | Odds Ratio (95% CI)        |                           |                       |                       |
|--------------------------|----------------------------|---------------------------|-----------------------|-----------------------|
|                          | No experience<br>(n= 4383) | No bereavement<br>(n=543) | Bereavement<br>(n=98) | Experience<br>(n=641) |
| <b>n (%)</b>             | 87.2                       | 10.8                      | 2.0                   | 12.8                  |
| <b>Unadjusted Models</b> | 1                          | 1.42(0.99-2.20)           | 2.46(1.32-4.59)       | 1.58(1.14-2.17)       |
| <b>Adjusted Models*</b>  | 1                          | 1.69(0.93-3.08)           | 2.82(1.24-6.39)       | 1.83(1.02-3.29)       |

\* Adjusted ORs are adjusted for gender, age during the earthquake, smoking, drinking, education, income, residence in Tangshan 1-2 years after the earthquake, hypertension, diabetes, and dyslipidemia

**Figure 1.** Depression rates for four categories of earthquake experience

**Figure 2.** Adjusted ORs of earthquake experience for depression stratified by gender and age during the Tangshan earthquake (adjusted for gender, age during the earthquake, marital status, smoking, drinking, education, income, residence in Tangshan 1-2 years after the earthquake, hypertension, diabetes, and dyslipidemia).

## REFERENCES

- 1 Smith K. Mental health: a world of depression. *Nature* 2014;**515**:181.
- 2 Who W, Mathers C, Fat DM, *et al*. The global burden of disease: 2004 update. *Irish Medical Journal* 2008;**106**:4.
- 3 Derivois D, Cenat JM, Joseph NE, *et al*. Prevalence and determinants of post-traumatic stress disorder, anxiety and depression symptoms in street children survivors of the 2010 earthquake in Haiti, four years after. *Child abuse & neglect* 2017;**67**:174-81.
- 4 Guo J, He H, Qu Z, *et al*. Post-traumatic stress disorder and depression among adult survivors 8 years after the 2008 Wenchuan earthquake in China. *Journal of affective disorders* 2017;**210**:27-34.
- 5 Harada N, Shigemura J, Tanichi M, *et al*. Mental health and psychological impacts from the 2011 Great East Japan Earthquake Disaster: a systematic literature review. *Disaster and military medicine* 2015;**1**:17.
- 6 Kadak MT, Nasiroglu S, Boysan M, *et al*. Risk factors predicting posttraumatic stress reactions in adolescents after 2011 Van earthquake. *Comprehensive psychiatry* 2013;**54**:982-90.
- 7 Fergusson DM, Horwood LJ, Boden JM, *et al*. Impact of a major disaster on the mental health of a well-studied cohort. *JAMA psychiatry* 2014;**71**:1025-31.
- 8 Khachadourian V, Armenian H, Demirchyan A, *et al*. A post-earthquake psychopathological investigation in Armenia: methodology, summary of findings, and follow-up. *Disasters* 2016;**40**:518-33.
- 9 Chan CL, Wang CW, Ho AH, *et al*. Symptoms of posttraumatic stress disorder and depression among bereaved and non-bereaved survivors following the 2008 Sichuan earthquake. *Journal of anxiety disorders* 2012;**26**:673-9.
- 10 van Griensven F, Chakkraband ML, Thienkrua W, *et al*. Mental health problems among adults in tsunami-affected areas in southern Thailand. *Jama* 2006;**296**:537-48.
- 11 Krishnan V, Nestler EJ. The molecular neurobiology of depression. *Nature* 2008;**455**:894-902.
- 12 Bryant RA. Early predictors of posttraumatic stress disorder. *Biological psychiatry* 2003;**53**:789-95.
- 13 North CS, Pfefferbaum B. Mental health response to community disasters: a systematic review. *Jama* 2013;**310**:507-18.
- 14 Hikichi H, Aida J, Tsuboya T, *et al*. Can Community Social Cohesion Prevent Posttraumatic Stress Disorder in the Aftermath of a Disaster? A Natural Experiment From the 2011 Tohoku Earthquake and Tsunami. *American journal of epidemiology* 2016;**183**:902-10.
- 15 Aker AT. [1999 Marmara earthquakes: a review of epidemiologic findings and community mental health policies]. *Turk psikiyatri dergisi = Turkish journal of psychiatry* 2006;**17**:204-12.

- 16 Sheng ZY. Medical support in the Tangshan earthquake: a review of the management of mass casualties and certain major injuries. *The Journal of trauma* 1987;**27**:1130-5.
- 17 An C, Zhang Y, Yu L, *et al.* Long-term impact of earthquake stress on fasting glucose control and diabetes prevalence among Chinese adults of Tangshan. *International journal of clinical and experimental medicine* 2014;**7**:4441-7.
- 18 Ji C, Li Y, Cui L, *et al.* Prenatal Earthquake Exposure and Midlife Uric Acid Levels Among Chinese Adults. *Arthritis care & research* 2017;**69**:703-8.
- 19 Li N, Wang Y, Yu L, *et al.* Long-term effects of earthquake experience of young persons on cardiovascular disease risk factors. *Archives of medical science : AMS* 2017;**13**:75-81.
- 20 Luo TY, Liu XH, Dai TY, *et al.* Ideal Cardiovascular Health Metrics and Coronary Artery Calcification in Northern Chinese Population: A Cross-sectional Study. *Biomedical and environmental sciences : BES* 2016;**29**:475-83.
- 21 Radloff LS. The CES-D Scale. *Applied Psychological Measurement* 1977;**1**:385-401.
- 22 Chien CP, Cheng TA. Depression in Taiwan: epidemiological survey utilizing CES-D. *Seishin shinkeigaku zasshi = Psychiatria et neurologia Japonica* 1985;**87**:335-8.
- 23 Schmitt JM, Ford DE. Role of depression in quality of life for patients with psoriasis. *Dermatology (Basel, Switzerland)* 2007;**215**:17-27.
- 24 Yang L, Zhao Y, Wang Y, *et al.* The Effects of Psychological Stress on Depression. *Current neuropharmacology* 2015;**13**:494-504.
- 25 Bryant RA, Creamer M, O'Donnell M, *et al.* Acute and Chronic Posttraumatic Stress Symptoms in the Emergence of Posttraumatic Stress Disorder: A Network Analysis. *JAMA psychiatry* 2017;**74**:135-42.
- 26 Bland SH, O'Leary ES, Farinero E, *et al.* Long-term psychological effects of natural disasters. *Psychosomatic medicine* 1996;**58**:18-24.
- 27 Cenat JM, Derivois D. Assessment of prevalence and determinants of posttraumatic stress disorder and depression symptoms in adults survivors of earthquake in Haiti after 30 months. *Journal of affective disorders* 2014;**159**:111-7.
- 28 Guo J, Wu P, Tian D, *et al.* Post-traumatic stress disorder among adult survivors of the Wenchuan earthquake in China: a repeated cross-sectional study. *Journal of anxiety disorders* 2014;**28**:75-82.
- 29 Ying LH, Wu XC, Lin CD, *et al.* Prevalence and predictors of posttraumatic stress disorder and depressive symptoms among child survivors 1 year following the Wenchuan earthquake in China. *European child & adolescent psychiatry* 2013;**22**:567-75.
- 30 Nakagawa I, Nakamura K, Oyama M, *et al.* Long-term effects of the Niigata-Chuetsu earthquake in Japan on acute myocardial infarction mortality: an analysis of death certificate data. *Heart (British Cardiac Society)* 2009;**95**:2009-13.
- 31 Guo J, He H, Fu M, *et al.* Suicidality associated with PTSD, depression, and disaster recovery status among adult survivors 8 years after the 2008 Wenchuan earthquake in China. *Psychiatry Res* 2017;**253**:383-90.

1  
2  
3  
4  
5  
6  
7  
8  
9  
10  
11  
12  
13  
14  
15  
16  
17  
18  
19  
20  
21  
22  
23  
24  
25  
26  
27  
28  
29  
30  
31  
32  
33  
34  
35  
36  
37  
38  
39  
40  
41  
42  
43  
44  
45  
46  
47  
48  
49  
50  
51  
52  
53  
54  
55  
56  
57  
58  
59  
60

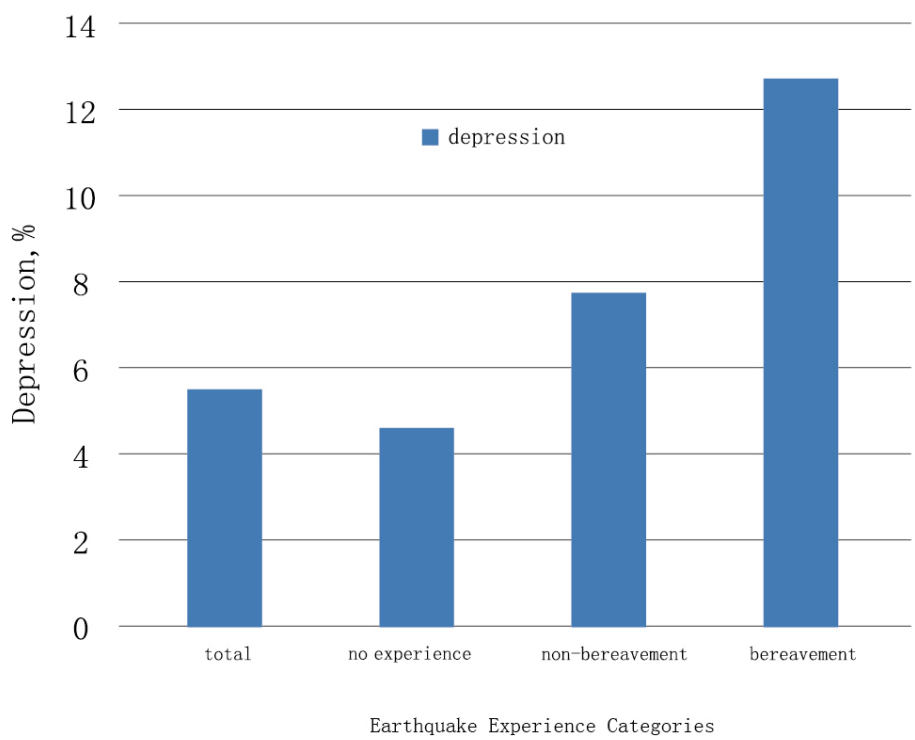

Depression rates for four categories of earthquake experience

90x90mm (300 x 300 DPI)

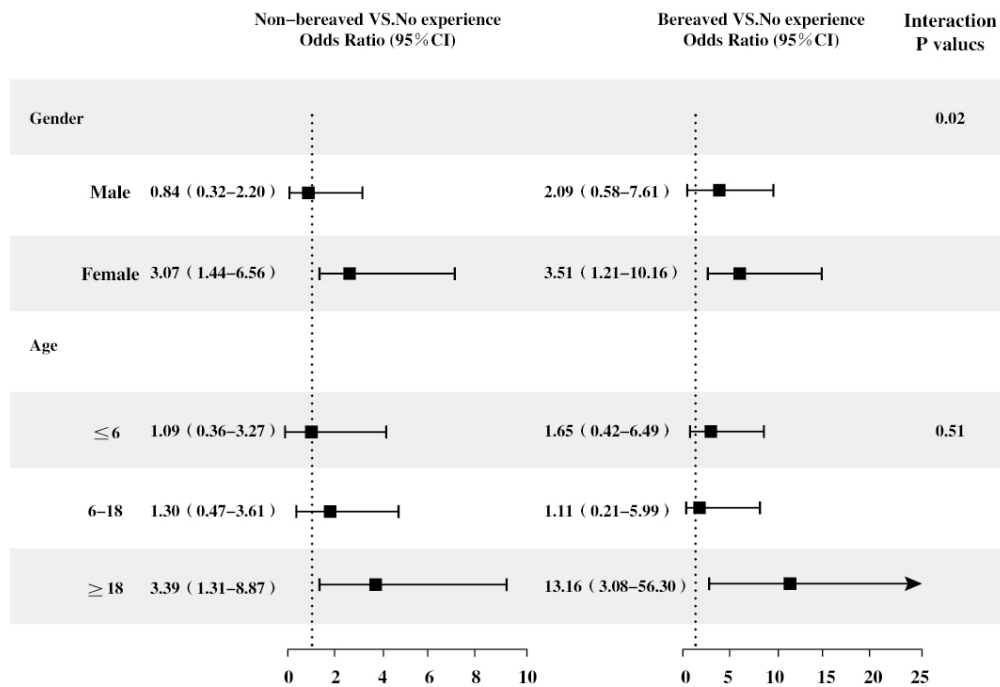

Adjusted ORs of earthquake experience for depression stratified by gender and age during the Tangshan earthquake

90x90mm (300 x 300 DPI)



# BMJ Open

## The Association between Earthquake Experience and Depression 37 Years after the Tangshan Earthquake: A Cross-sectional Study

|                                 |                                                                                                                                                                                                                                                                                                                                                                                                                                                                                                                                                                                                                                                                                                                                                                                                                                                                                                                                                                                                                                                                                                                                                          |
|---------------------------------|----------------------------------------------------------------------------------------------------------------------------------------------------------------------------------------------------------------------------------------------------------------------------------------------------------------------------------------------------------------------------------------------------------------------------------------------------------------------------------------------------------------------------------------------------------------------------------------------------------------------------------------------------------------------------------------------------------------------------------------------------------------------------------------------------------------------------------------------------------------------------------------------------------------------------------------------------------------------------------------------------------------------------------------------------------------------------------------------------------------------------------------------------------|
| Journal:                        | <i>BMJ Open</i>                                                                                                                                                                                                                                                                                                                                                                                                                                                                                                                                                                                                                                                                                                                                                                                                                                                                                                                                                                                                                                                                                                                                          |
| Manuscript ID                   | bmjopen-2018-026110.R1                                                                                                                                                                                                                                                                                                                                                                                                                                                                                                                                                                                                                                                                                                                                                                                                                                                                                                                                                                                                                                                                                                                                   |
| Article Type:                   | Research                                                                                                                                                                                                                                                                                                                                                                                                                                                                                                                                                                                                                                                                                                                                                                                                                                                                                                                                                                                                                                                                                                                                                 |
| Date Submitted by the Author:   | 13-Jan-2019                                                                                                                                                                                                                                                                                                                                                                                                                                                                                                                                                                                                                                                                                                                                                                                                                                                                                                                                                                                                                                                                                                                                              |
| Complete List of Authors:       | Gao, Xing; Chinese Academy of Medical science, Institute of Medical Information<br>Leng, Yue; Global Brain Health Institute , Department of Psychiatry, University of California<br>Guo, Yuchen; Chinese Academy of Medical Science, Institute of Medical Information<br>Yang, Jichun; Department of Physiology and Pathophysiology, School of Basic Medical Sciences Key Laboratory of Molecular Cardiovascular Science of the Ministry of Education Center for Non-coding RNA Medicine Peking University Health Science Center<br>Cui, Qinghua; Department of Biomedical Informatics, School of Basic Medical Sciences Key Laboratory of Molecular Cardiovascular Science of the Ministry of Education Center for Non-coding RNA Medicine Peking University Health Science Center<br>Geng, Bin ; Hypertension Center, Fuwai Hospital, Chinese Academy of Medical Sciences and Peking Union Medical College, State Key Laboratory of Cardiovascular Disease<br>Hu, Hongpu; Chinese Academy of Medical science, Institute of Medical Information<br>zhou, Yong; Sanbo Brain Institute, Sanbo Brain Hospital, Capital Medical University, Beijing, China. |
| <b>Primary Subject Heading</b>: | Epidemiology                                                                                                                                                                                                                                                                                                                                                                                                                                                                                                                                                                                                                                                                                                                                                                                                                                                                                                                                                                                                                                                                                                                                             |
| Secondary Subject Heading:      | Mental health, Public health, Health services research                                                                                                                                                                                                                                                                                                                                                                                                                                                                                                                                                                                                                                                                                                                                                                                                                                                                                                                                                                                                                                                                                                   |
| Keywords:                       | Depression & mood disorders < PSYCHIATRY, Earthquake, Association, EPIDEMIOLOGY                                                                                                                                                                                                                                                                                                                                                                                                                                                                                                                                                                                                                                                                                                                                                                                                                                                                                                                                                                                                                                                                          |
|                                 |                                                                                                                                                                                                                                                                                                                                                                                                                                                                                                                                                                                                                                                                                                                                                                                                                                                                                                                                                                                                                                                                                                                                                          |

SCHOLARONE™  
Manuscripts

1  
2  
3 1 **The Association between Earthquake Experience and Depression 37 Years after**  
4  
5 2 **the Tangshan Earthquake: A Cross-sectional Study**

6  
7  
8 3 Xing Gao <sup>1</sup>, Yue Leng <sup>2</sup>, Yuchen Guo <sup>1</sup>, Jichun Yang <sup>3</sup>, Qinghua Cui <sup>3</sup>, Bin Geng <sup>4</sup>,  
9  
10 4 Hongpu Hu <sup>1</sup>, Yong Zhou <sup>5</sup>

11  
12  
13  
14  
15 6 **Corresponding Author**

16  
17 7 1 Hong-Pu Hu, MD, PhD

18  
19 8 Professor of Institute of Medical Information, Chinese Academy of Medical Sciences,  
20  
21 9 Beijing

22  
23  
24 10 Address: Yabao Road 3, CN-100020 Beijing, China

25  
26 11 Tel./Fax: 86-10-52328610/86-10-52328870

27  
28 12 Email: hu.hongpu@imicams.ac.cn

29  
30 13 2 Yong Zhou, MD, PhD

31  
32 14 Associate Research Fellow

33  
34 15 Sanbo Brain Institute, Sanbo Brain Hospital, Capital Medical University, Beijing,  
35  
36 16 China.

37  
38  
39 17 Address: No 50 Yikesong Street of Fragrant Hills, Haidian District, Beijing, 100093,  
40  
41 18 China.

42  
43 19 Tel./Fax: 86-10-62859629

44  
45 20 Email: yongzhou78214@163.com

46  
47  
48  
49 21

50  
51 22 **Authors' Affiliation**

52  
53 23 1 Institute of Medical Information, Chinese Academy of Medical Sciences, Beijing,  
54  
55 24 P.R. China

- 1  
2  
3 25 2 Global Brain Health Institute, Department of Psychiatry, University of California,  
4  
5 26 San Francisco, USA  
6  
7  
8 27 3 Department of Physiology and Pathophysiology, School of Basic Medical Sciences,  
9  
10 28 Key Laboratory of Molecular Cardiovascular Science of the Ministry of Education  
11  
12 29 Center for Non-coding RNA Medicine, Peking University Health Science Center,  
13  
14 30 Beijing, P.R. China  
15  
16  
17 31 4 Hypertension Center, Fuwai Hospital, Chinese Academy of Medical Sciences and  
18  
19 32 Peking Union Medical College, State Key Laboratory of Cardiovascular Disease,  
20  
21 33 Beijing, P.R. China  
22  
23  
24 34 5 Sanbo Brain Institute, Sanbo Brain Hospital, Capital Medical University, Beijing,  
25  
26 35 P.R. China  
27  
28  
29 36

30  
31 **Joint first authorship**  
32

33 38 Yue Leng, M.Phil, PhD  
34

35 39 Atlantic Fellow, Global Brain Health Institute, Department of Psychiatry, University  
36  
37 40 of California, San Francisco, USA  
38  
39

40 41

41  
42 **Word count: 3116**  
43  
44  
45  
46  
47  
48  
49  
50  
51  
52  
53  
54  
55  
56  
57  
58  
59  
60

1  
2  
3 43 **ABSTRACT**  
4

5 44 **Objective** To investigate the association between the Tangshan earthquake and the  
6  
7  
8 45 risk of depression after 37 years.  
9

10 46 **Design and setting** A cross-sectional study conducted in Tangshan from 2013 to  
11  
12 47 2014.  
13

14 48 **Participants** The sample included 5024 participants born before July 28, 1976, when  
15  
16  
17 49 the Tangshan earthquake occurred, with available data on their earthquake  
18  
19 50 experiences and depression 37 years after the earthquake.  
20

21 51 **Outcomes and variables** The outcome was depression measured using the Center for  
22  
23 52 Epidemiological Study and Depression Scale (CES-D). The independent variable was  
24  
25 53 earthquake experience, with 3 groups: no earthquake experience, earthquake  
26  
27 54 experience without bereavement, and earthquake experience with bereavement.  
28  
29 55 Multivariable logistic analysis was used to evaluate the association between  
30  
31 56 earthquake experience and depression after adjusting for gender, age at the time of the  
32  
33 57 earthquake, smoking status, drinking status, education, income, residence in Tangshan  
34  
35 58 1-2 years after the earthquake, hypertension, diabetes, and dyslipidemia.  
36  
37  
38

39 59 **Results** Of the 5024 participants, 641 experienced the Tangshan earthquake, and 98  
40  
41 60 experienced bereavement. Participants who experienced the earthquake (with or  
42  
43 61 without bereavement) had higher prevalence of depression than those without  
44  
45 62 earthquake experience (12.2%, 7.2% vs. 4.9%, respectively), 37 years after the  
46  
47 63 earthquake. Survivors who lost relatives during the earthquake were nearly 3-times  
48  
49 64 (OR 2.82, 95% CI 1.24-6.39) as likely to have depression as those who did not  
50  
51 65 experience the earthquake. A statistically significant association between the  
52  
53 66 earthquake and depression was found in women, but not in men, and in individuals  
54  
55 67 over 18 years of age.  
56  
57  
58  
59  
60

1  
2  
3 68 **Conclusions** Earthquake experience had long-lasting effects on depression among  
4  
5 69 bereaved survivors, women and individuals over 18 years old 37 years later.  
6  
7

8 70  
9

10 71 **Word count: 260**  
11  
12  
13  
14  
15  
16  
17  
18  
19  
20  
21  
22  
23  
24  
25  
26  
27  
28  
29  
30  
31  
32  
33  
34  
35  
36  
37  
38  
39  
40  
41  
42  
43  
44  
45  
46  
47  
48  
49  
50  
51  
52  
53  
54  
55  
56  
57  
58  
59  
60

For peer review only

1  
2  
3 72 **Strengths and limitations of this study**  
4

5 73 ● The study investigated the long-term risk of depression as long as 37 years after a  
6  
7 74 major earthquake.

8  
9  
10 75 ● Participants were stratified by gender and age at the time of the earthquake.

11  
12 76 ● We were unable to control for every event or factor, such as adverse childhood  
13  
14 77 experiences, other bereavement or current psychological stressors.

15  
16  
17 78 ● Individuals who experienced the Tangshan earthquake did not include those who  
18  
19 79 died.  
20  
21  
22  
23  
24  
25  
26  
27  
28  
29  
30  
31  
32  
33  
34  
35  
36  
37  
38  
39  
40  
41  
42  
43  
44  
45  
46  
47  
48  
49  
50  
51  
52  
53  
54  
55  
56  
57  
58  
59  
60

## 80 INTRODUCTION

81 Depression is predicted to be a major reason for disability around the world by 2030  
82 according to the World Health Organization<sup>1</sup>. In addition, the chronic and debilitating  
83 nature of depression complicates the prognosis of chronic diseases, aggravates  
84 diseases and even leads to suicide<sup>2-4</sup>. Evidence shows that depression is related to  
85 demographic characteristics, living habits, education, income, and health status<sup>5-7</sup>.  
86 Participants exposed to disasters at early life stage are of higher risk of depression,  
87 independent to age, gender, income, education and other confounders in the short  
88 term (1-4 years)<sup>8-10</sup>. Meanwhile, studies report that some survivors have  
89 psychological problems in the immediate aftermath of disaster trauma, most of these  
90 reactions abate over time, and only a minority of survivors develop a long-standing  
91 disorder<sup>11 12</sup>. Therefore, long-term evidence is essential to evaluate the effects of  
92 disaster on depression.

93 Findings regarding the long-term impact of disasters on mental health have been  
94 mixed. Several studies have reported no differences<sup>13 14</sup>, but others have revealed  
95 more psychological problems in exposed individuals compared with non-exposed  
96 individuals for more than a decade after disasters<sup>10 15 16</sup>. Moreover, evidences show  
97 that such effects are increased if survivors suffer from bereavement<sup>10 12</sup>. Overall  
98 levels of psychological symptoms may be associated with different age stages<sup>17 18</sup>,  
99 and women show more psychological symptoms than men<sup>13 19</sup>. However, in these  
100 studies, the samples were relative small and not representative of the affected  
101 population. One study with a sample of 529 people followed the childhood survivors  
102 of natural disasters for 20 years, while depression was not investigated<sup>14</sup>.

103 Our study provides a suitable setting for investigating the long-term effect of  
104 disasters on depression. The Tangshan earthquake, which occurred in 1976, had a

1  
2  
3 105 magnitude of 7.8 on the Richter scale<sup>20</sup>. The earthquake caused 242,769 deaths and  
4  
5 106 left 164,851 people severely injured, representing the most deadly and the strongest  
6  
7 107 natural disaster in the twentieth century<sup>20</sup>. Over the past 37 years, numerous studies  
8  
9 108 have examined the effects of the Tangshan earthquake on physical health outcomes.  
10  
11 109 These studies report increased risks of diabetes, cardiovascular disease, and elevated  
12  
13 110 levels of uric acid among survivors of the Tangshan earthquake even more than 30  
14  
15 111 years later<sup>21-23</sup>. However, no study to date has examined the long-term effect of the  
16  
17 112 Tangshan earthquake on the risk of depression.  
18  
19  
20

21 113 The aim of our study was to examine the long-term effect of disaster on depression  
22  
23 114 37 years later. We hypothesized that the earthquake-exposed group would be more  
24  
25 115 likely to exhibit depression. Furthermore, we expected that bereaved survivors would  
26  
27 116 be more likely to experience depression than the non-bereaved. Considering that age  
28  
29 117 and gender may confound the association between earthquake experience and  
30  
31 118 depression, we also performed an analysis stratified by age and gender.  
32  
33  
34  
35  
36  
37

## 38 120 **METHODS**

### 39 121 **Study participants**

40 122 The participants were selected from the Jidong Cohort, an ongoing community-based  
41  
42 123 prospective study on Chinese adults<sup>24</sup>. In brief, the Jidong community is located in the  
43  
44 124 Caofeidian district of Tangshan City, which is approximately 60 km from the  
45  
46 125 epicenter of the Tangshan earthquake. A clustering sample method was used to select  
47  
48 126 participants. From July 2013 to August 2014, a total of 9078 residents in Jidong  
49  
50 127 community were recruited to participate in the cohort. This cohort has prospectively  
51  
52 128 collected data regarding demographic and behavioral characteristics, insomnia,  
53  
54 129 cognition, depression, and biochemical indicators at annual follow-ups since 2013<sup>25-</sup>  
55  
56  
57  
58  
59  
60



1  
2  
3 130 <sup>27</sup>. These data were collected using a set of combined self-administered questionnaires  
4  
5 131 (including the Center for Epidemiological Study and Depression Scale (CES-D)) with  
6  
7 132 assistance of well-trained research nurses during face-to-face interviews. Biomedical  
8  
9 133 variables were collected by physical examinations and laboratory assessments. The  
10  
11 134 research field of this cohort has gradually expanded from the initial sub-health to  
12  
13 135 depression, cardiovascular and cerebrovascular and other fields <sup>25-28</sup>.

16  
17 136 In the current study, we excluded 4054 subjects from the 9078 participants  
18  
19 137 according to the following standards: (1) born after July 28th, 1976 (n=4053), (2)  
20  
21 138 incomplete information on relevant earthquake experience (n=1), and (3) missing  
22  
23 139 values in the surveys for the CES-D measurement scale (n=0). Missing data for  
24  
25 140 confounding variables (60 income variables) were imputed with their mean values  
26  
27 141 among these participants. Finally, a total of 5024 individuals were included in this  
28  
29 142 cross-sectional study. The response rate was 99.99% (5024/5025).

30  
31  
32  
33 143 This study was performed according to guidelines from the Helsinki Declaration  
34  
35 144 and approved by the Ethics Committee of Jidong Oilfield Staff Hospital. All  
36  
37 145 participants provided written informed consent.

#### 38 39 40 146 41 42 147 **Assessment of the earthquake experience**

43  
44 148 The exposure variable of interest was earthquake experience. Earthquake experience  
45  
46 149 and related bereavement were collected from a structured questionnaire. These factors  
47  
48 150 were obtained using the question “Were you in the Tangshan earthquake area in  
49  
50 151 1976?” and “Did you lose any relatives in the earthquake?”<sup>23</sup> According to the  
51  
52 152 answers to these questions, subjects were classified into 3 groups: no earthquake  
53  
54 153 experience, earthquake experience without bereavement, and earthquake experience  
55  
56 154 with bereavement.

### 155 **Assessment of current depression**

156 Depressive symptoms were assessed using CES-D, which was initially developed by  
157 the United States National Institute of Mental Health in 1977<sup>29</sup>. The Chinese version  
158 of the CES-D was translated by two psychiatrists on the basis of the international  
159 standard version of the CES-D questionnaire in 1985 and was specifically designed to  
160 screen for depression<sup>30</sup>. The CES-D measures the frequency of common depressive  
161 symptoms over the past week, which are surveyed through the questionnaire. Each  
162 item in the depression assessment section of the questionnaire is scored from 0 (rarely  
163 or none of the time, less than one day) to 3 (all of the time, 5–7 days). The four  
164 positive statement items (item 4, I felt that I was just as good as other people; item 8, I  
165 felt hopeful about the future; item 12, I was happy; item 16, I enjoyed life) are  
166 reverse-coded to calculate the total score, which ranges from 0 to 60. The cut-off  
167 value of  $\geq 16$  has been widely used to define clinically meaningful depressive  
168 symptoms<sup>31-33</sup>. All investigators attended a 3-day training course and were licensed  
169 before conducting the CES-D interviews.

### 171 **Assessment of potential covariates**

172 The selected covariates included factors known to be predictive of depression and/or  
173 potentially correlated with earthquake exposure, including age at the time of the  
174 earthquake, gender, education, income, smoking, drinking, residence in Tangshan 1-2  
175 years after the earthquake, hypertension, diabetes, and dyslipidemia.

176 Age at the time of the earthquake was defined as a continuous variable and a  
177 categorical variable (“ $\leq 6$  years”, “6-18 years”, or “ $\geq 18$  years”). The average  
178 monthly income of each family member was categorized as “ $< ¥3000$ ”, “ $¥3000-5000$ ”  
179 or “ $> ¥5,000$ ”. Educational level was classified into three categories: “illiterate or

1  
2  
3 180 primary school,” “middle school or high school,” and “university or above.” Smoking  
4  
5 181 status was classified as “yes” (current smoker or quit <12 months ago) and “no”  
6  
7  
8 182 (nonsmoker or quit >12 months ago).” Drinking status was divided into “yes” (<1  
9  
10 183 standard servings/day, <2 standard servings/day, 2-4 standard servings/day, >=5  
11  
12 184 standard servings/day) and “no” (never drink). A standard serving was 15 g of  
13  
14 185 ethanol. Systolic blood pressure (SBP) and diastolic blood pressure (DBP) were  
15  
16 186 measured twice with the subject in a seated position using a mercury  
17  
18 187 sphygmomanometer. If the difference between the two measurements exceeded 5 mm  
19  
20 188 Hg, an additional reading was taken, and the average of the three readings was used.  
21  
22 189 Hypertension was defined as having a history of hypertension, exhibiting an SBP  
23  
24 190  $\geq 140$  mm Hg or a DPB  $\geq 90$  mm Hg, or using antihypertensive medications. The  
25  
26 191 definition of diabetes mellitus was a fasting glucose level  $\geq 7.0$  mmol/l (126 mg/dl),  
27  
28 192 current treatment with insulin/oral hypoglycemic agents or a history of diabetes  
29  
30 193 mellitus. Dyslipidemia was defined as having a history of hyperlipidemia, total blood  
31  
32 194 cholesterol levels  $\geq 220$  mg/dl, triglyceride levels  $\geq 150$  mg/dl, or using anti-  
33  
34 195 hyperlipidemic medications. All measures were current in this cross-sectional study.  
35  
36  
37  
38  
39  
40  
41

196

### 197 **Statistical analysis**

198 We first compared the characteristics of individuals according to their earthquake and  
199 bereavement experiences (no earthquake experience, earthquake experience without  
200 bereavement, and earthquake experience with bereavement) using the chi-square test  
201 for categorical variables and one-way ANOVA or the Kruskal–Wallis test for  
202 continuous variables.

203 We used logistic regression to examine the association between earthquake  
204 experience and current depression, with "no earthquake experience" as the reference

1  
2  
3 205 group. Four multivariate models were fitted as follows: Model 1 was the unadjusted  
4  
5 206 model. Model 2 was adjusted for age at the time of the earthquake and gender. Model  
6  
7 207 3 was further adjusted for smoking status, drinking status, education, income,  
8  
9 208 residence in Tangshan 1-2 years after the earthquake. Model 4 was further adjusted  
10  
11 209 for hypertension, diabetes, and dyslipidemia.  
12  
13

14  
15 210 We also used multiple logistic regression to examine the association stratified by  
16  
17 211 gender and age at the time of the earthquake. To evaluate whether effect of the  
18  
19 212 earthquake on depression would be modified by gender and age at the time of the  
20  
21 213 earthquake, we tested the statistical significance of earthquake  $\times$  gender and  
22  
23 214 earthquake  $\times$  age at the time of the earthquake in a multiple-adjustment logistic model  
24  
25 215 by a post-estimation Wald test to obtain an omnibus P-value for the interactions  
26  
27 216 between earthquake categories and depression.  
28  
29

30  
31 217 All statistical tests were 2-sided, and results with a P-value  $<0.05$  were considered  
32  
33 218 statistically significant. The analyses were performed in SAS version 9.4 (SAS  
34  
35 219 Institute Inc., Cary, NC, USA).  
36  
37

38 220

### 40 221 **Patient and public involvement**

41  
42 222 Patients and the public were not involved in development of the research question or  
43  
44 223 outcome measures, study design, or recruitment to and conduct of this study. Results  
45  
46 224 will be disseminated to study participants through annual information events.  
47  
48

49 225

## 51 226 **RESULTS**

### 53 227 **Characteristics of the study participants**

54  
55 228 The characteristics of the participants according to earthquake and bereavement  
56  
57 229 experiences are shown in Table 1. In total, 5024 participants were included in this  
58  
59  
60

1  
2  
3 230 study, with 50.2% male participants and current ages ranging from 37 to 82 years.  
4  
5 231 Among all participants, 543 (10.8%) individuals experienced the earthquake without  
6  
7 232 bereavement, and 98 (2.0%) participants lost relatives. The individuals who  
8  
9 233 experienced the earthquake with or without bereavement were younger ( $12.1\pm 9.0$ ,  
10  
11 234  $13.1\pm 9.1$  vs.  $14.8\pm 9.2$  years, respectively) and were more likely to have lived in  
12  
13 235 Tangshan 1-2 years after the earthquake (86.7%, 79.4% vs. 1%, respectively) than  
14  
15 236 those who had not experienced the earthquake. No differences were found in gender,  
16  
17 237 smoking status, drinking status, education, income, hypertension, diabetes or  
18  
19 238 dyslipidemia. A higher incidence of depression was observed in the bereaved and  
20  
21 239 non-bereaved groups (12.2% (39/543) and 7.2% (12/98), respectively) than in those  
22  
23 240 without earthquake experience (4.9% (215/4383)).  
24  
25  
26  
27  
28  
29  
30

### 31 242 **Association of earthquake experience with depression**

32  
33 243 Odds ratios (ORs) with 95% confidence intervals (CIs) for the association between  
34  
35 244 earthquake experience and depression are presented in Table 2. The risk of depression  
36  
37 245 in the bereaved subgroup was 2.82-times (OR, 2.82; 95% CI, 1.24-6.39) higher than  
38  
39 246 that in the group with no earthquake experience, after adjusting for gender, age at the  
40  
41 247 time of the earthquake, smoking status, drinking status, education, income, residence  
42  
43 248 in Tangshan 1-2 years after the earthquake, hypertension, diabetes, and dyslipidemia.  
44  
45 249 However, no statistically significant association was found in the non-bereaved group.  
46  
47  
48  
49

50 250

### 51 251 **Subgroup analysis by gender and age during the earthquake**

52  
53 252 In the models stratified by gender, the female subjects in both the bereaved (OR, 3.07;  
54  
55 253 95% CI, 1.44-6.56) and non-bereaved (OR, 3.51; 95% CI, 1.21-10.16) subgroups had  
56  
57 254 an increased risk of depression. In the models stratified by age at the time of the  
58  
59  
60

1  
2  
3 255 earthquake, we found a statistically significant association in individuals over 18  
4  
5 256 years with bereavement (OR, 13.16; 95% CI, 3.08-56.3) or without bereavement (OR,  
6  
7 257 3.39; 95% CI, 1.31-8.87). We also found a statistically significant interaction between  
8  
9 258 gender and depression ( $P$  for interaction= 0.02), but not significant between age at the  
10  
11 259 time of the earthquake and depression ( $P$  for interaction= 0.51) (Figure 1).  
12  
13  
14  
15 260

## 16 17 261 **DISCUSSION**

18  
19 262 In the community-based study, we observed that earthquake survivors had a higher  
20  
21 263 risk of depression than those who did not experience an earthquake even 37 years  
22  
23 264 later. In addition, long-term effects of an earthquake on depression were found among  
24  
25 265 survivors with bereavement, women and individuals over 18 years. This is the first  
26  
27 266 study to investigate the association between earthquake experience and depression as  
28  
29 267 long as 37 years after an earthquake.  
30  
31  
32

33 268 Consistent with our findings, a longitudinal study on the Alexander Kiedand oil  
34  
35 269 platform collapse shows that survivors have a higher risk of depression than non-  
36  
37 270 exposed individuals 27 years after the disaster<sup>15</sup>. Similar results are observed in  
38  
39 271 another longitudinal study with 10 years of follow-up, which indicates that survivors  
40  
41 272 of the Piper Alpha oil platform disaster show continued problems of mental health  
42  
43 273 compared with non-exposed individuals<sup>16</sup>. In contrast, some previous studies report  
44  
45 274 no significant differences between exposed population and non-exposed population in  
46  
47 275 mental health<sup>13 14</sup>. The inconsistent results may be explained by 3 reasons. First,  
48  
49 276 subclinical psychotic experiences (SPE) and depression reflect different aspects of  
50  
51 277 psychological problems. SPE is defined as symptoms or experiences of or experiences  
52  
53 278 resembling hallucinations, delusions or both<sup>34</sup>, whereas depressive disorder is  
54  
55 279 characterized by sadness or irritability<sup>35</sup>. Differences in symptoms may explain why  
56  
57  
58  
59  
60

1  
2  
3 280 our findings differ from the results of the 20-year follow-up study of Australian bush  
4  
5 281 fires. Second, psychological problems may depend on the severity of a trauma. For  
6  
7 282 example, Galletly C et al reported that the risk of psychological disorder is associated  
8  
9 283 with multiple traumas rather than a single major trauma<sup>14</sup>. Third, the trauma  
10  
11 284 experiences of the participants in these studies are different. In the study on Buffalo  
12  
13 285 Creek survivors, few survivors suffer from bereavement<sup>13</sup>, which is different from the  
14  
15 286 survivors in our study. Different characteristics of trauma experiences between the  
16  
17 287 two studies may account for the discrepancy.

21 288 The long-term effect of disaster on depression seems to depend on traumatic  
22  
23 289 experience. In our study, a statistically significant association between earthquake  
24  
25 290 experience and depression was observed in bereaved survivors but not in non-  
26  
27 291 bereaved survivors 37 years after the earthquake. The finding was consistent with a  
28  
29 292 longitudinal study carried out in Italian, which shows that exposure to loss and  
30  
31 293 damage during the earthquake is of higher risk of negative psychological  
32  
33 294 consequences than these merely live in the earthquake zone<sup>10</sup>. Similarly, a  
34  
35 295 longitudinal study on MS Estonia Disaster indicates that psychological disorders can  
36  
37 296 persist in bereaved survivors but not in non-bereaved survivors 14 years after the  
38  
39 297 disaster<sup>12</sup>. Traumatic bereavement may be associated with more severe long-term  
40  
41 298 posttraumatic stress reactions after disasters<sup>36</sup>, which is considered to be involved in  
42  
43 299 the onset of depression<sup>4</sup>.

49 300 Several plausible explanations may link earthquake exposure to the prevalence of  
50  
51 301 depressive symptoms. Earthquakes can cause tremendous, immediate damage to the  
52  
53 302 environment and even lead to adverse life events such as the death of a family  
54  
55 303 member and related events, thus exerting negative effects on individuals' emotions  
56  
57 304 and resulting in long-term posttraumatic stress reactions after the disaster<sup>4 12</sup>. Long-  
58  
59  
60



1  
2  
3 305 term posttraumatic stress reactions may affect neurobiological adjustments, which  
4  
5 306 have been linked to several brain areas (the frontolimbic and striatal areas)<sup>36 37</sup>. These  
6  
7 307 areas and the functional connectivities located within the fronto-striato-thalamic and  
8  
9 308 default-mode networks have been found to be correlated with progression of  
10  
11 309 depressive symptom and may play important roles in adaptation to trauma<sup>4 38</sup>.

12  
13  
14 310 Gender, age at the time of the earthquake, education, income, smoking, drinking,  
15  
16 311 living in the affected area after a disaster, hypertension, diabetes and dyslipidemia  
17  
18 312 were controlled in the multiple variable analysis. To avoid over-adjustment, four  
19  
20 313 models were used to adjust confounding variables step by step. The resulting ORs  
21  
22 314 reflected minor changes in the 4 models, suggesting that earthquake experience may  
23  
24 315 be an independent risk factor for the occurrence of depression.

25  
26  
27 316 Evidence shows that trauma experience in childhood and adolescence may have a  
28  
29 317 determining effect on brain structural development, sympathetic nervous system  
30  
31 318 responsivity, and the hypothalamic pituitary adrenal axis, especially in younger  
32  
33 319 children (preschool) and school-age children (late childhood and early adolescence),  
34  
35 320 resulting in a large stress response and some psychological problems<sup>18</sup>. Therefore, we  
36  
37 321 classified age into 0-6, 6-18 and older than 18 years to investigate the long-term  
38  
39 322 impact of disaster on mental health at different age stages. However, statistically  
40  
41 323 significant associations were found only in individuals over 18 years. One possible  
42  
43 324 explanation is that perception of disaster-related stressors in the  $\leq 6$  and 6-18 years  
44  
45 325 age groups is different from that in the  $>18$  years age group. Disaster trauma as a  
46  
47 326 stressor is not sufficient to promote mental illness among individuals at the ages of 0-  
48  
49 327 6 and 6-18 years. A preschool child has less specific cognitive awareness of the nature  
50  
51 328 and meaning of disaster trauma<sup>39</sup>. Although a school-age child has a more mature  
52  
53 329 cognitive understanding of the nature of a trauma situation and may respond with  
54  
55  
56  
57  
58  
59  
60



1  
2  
3 330 symptoms related to depression, parental care and family play important roles in  
4  
5 331 determining the risk of psychological disorder among school-age children<sup>40</sup>. We also  
6  
7 332 found a long-term effect of earthquake experience on depression in women. Similar  
8  
9 333 results have been found in several previous studies of disaster, indicating that women  
10  
11 334 may be at a higher risk of depression than men<sup>13 19</sup>.

12  
13  
14 335 Our study had a few limitations. First, substantial time has passed since the  
15  
16 336 earthquake occurred, and we were unable to control for every event or factor. For  
17  
18 337 example, we did not consider other traumatic events, such as traffic accidents, adverse  
19  
20 338 childhood experiences, other bereavement or current psychological stressors, which  
21  
22 339 could have confounded the observed associations. Additionally, the sample was not  
23  
24 340 representative of all survivors of the Tangshan earthquake. We did not include  
25  
26 341 survivors who had died in the past 37 years. Premature death may be related to  
27  
28 342 depression and disease. Meanwhile, in our sample, nearly 20% of the survivors did  
29  
30 343 not live in the earthquake zone 1-2 years after the earthquake. These people left the  
31  
32 344 painful environment and may have attended school or worked in another place for  
33  
34 345 several years, which may have largely relieved psychological stress and alleviated the  
35  
36 346 symptoms of depression. Therefore, the potential impacts of the earthquake on  
37  
38 347 depression may have been underestimated. Third, whether the subjects were taking  
39  
40 348 antidepressants was unknown. Fourth, this is a cross-sectional study, which precludes  
41  
42 349 causal inferences. However, since the earthquake is immutable, the earthquake is  
43  
44 350 likely to be the cause of depression. Finally, depression was assessed only once  
45  
46 351 during the study; therefore, we could not exclude the possibility of reverse causality.

47  
48 352 The results of our study are very relevant to future research on depression among  
49  
50 353 disaster survivors. For instance, survivors of earthquakes in Japan, Haiti, and China  
51  
52 354 were all affected by high rates of depression in the short term<sup>41-44</sup>. Although the time  
53  
54  
55  
56  
57  
58  
59  
60

1  
2  
3 355 and severity of a disaster, the ethnicity of the affected population, and the growing  
4  
5 356 environment are different, the stressors caused by disasters are similar. Intervention is  
6  
7  
8 357 highly effective in facilitating recovery from disaster trauma<sup>45 46</sup>. Clinicians and  
9  
10 358 policymakers in public health should direct more attention toward high-risk survivors  
11  
12 359 of disasters, which may reduce the incidence of mental health problems, including  
13  
14 360 depression, in disaster zones<sup>47</sup>, even if the disaster has passed for a long time.  
15  
16  
17 361

18  
19 362 **CONCLUSIONS**

20  
21 363 Earthquake experience had long-lasting effects on depression among bereaved  
22  
23 364 survivors, women and individuals over 18 years 37 years later. Our study provides  
24  
25 365 evidence supporting the hypothesis that the effect of an earthquake on depression  
26  
27  
28 366 persists for 37 years.  
29  
30  
31  
32  
33  
34  
35  
36  
37  
38  
39  
40  
41  
42  
43  
44  
45  
46  
47  
48  
49  
50  
51  
52  
53  
54  
55  
56  
57  
58  
59  
60

1  
2  
3 **Acknowledgments** We thank all the participants, patient advisers and the members of  
4  
5 the survey team in Jidong community. We also appreciate the help and support of the  
6  
7 staff of Ruike Donghua Co., Ltd. During the review period, Yong Zhou changed his  
8  
9 work affiliation due to transfer of employment. We guarantee that all authors have  
10  
11 approved the changes of authorship.  
12  
13

14 **Contributors** All authors have been involved from the beginning in all phases of the  
15  
16 study. XG, YZ and HPH designed the study. XG and YL analyzed the data and  
17  
18 prepared the manuscript. JCY, QHC and BG critiqued the manuscript for important  
19  
20 intellectual content. XG and YCG conducted the statistical analysis. All authors have  
21  
22 read and approved the final version of this manuscript.  
23  
24

25 **Funding** This work was supported by the National Natural Science Foundation (No.  
26  
27 81473057, No. 81202279), the National Social Science Fund (No. 17BGL184) and  
28  
29 Central-level nonprofit scientific research institutes of basic projects of China (No.  
30  
31 2017PT63009).  
32  
33

34 **Competing interests** None declared.  
35  
36

37 **Ethics approval** The research was approved by the Ethics Committee of Jidong  
38  
39 Oilfield Staff Hospital.  
40  
41

42 **Data sharing statement** The data used or analyzed during the current study are  
43  
44 available from the corresponding author upon reasonable request.  
45  
46  
47  
48  
49  
50  
51  
52  
53  
54  
55  
56  
57  
58  
59  
60

**Table 1 Population characteristics according to earthquake experience**

| <b>Characteristics</b>                          | <b>Overall</b> | <b>No experience<br/>(n=4383)</b> | <b>Experience without<br/>bereavement<br/>(n=543)</b> | <b>Experience with<br/>loss of family<br/>(n=98)</b> | <b><i>P-value</i></b> |
|-------------------------------------------------|----------------|-----------------------------------|-------------------------------------------------------|------------------------------------------------------|-----------------------|
| Men, n (%)                                      | 2524 (50.2)    | 2210 (50.4)                       | 276 (50.8)                                            | 38 (38.8)                                            | 0.07                  |
| Age at the time of the<br>earthquake, mean (SD) | 14.6±9.2       | 14.8±9.2                          | 13.1±9.1                                              | 12.1±9.0                                             | <0.0001               |
| =<6                                             | 1063 (21.2)    | 880 (20.08)                       | 146 (26.89)                                           | 37 (37.76)                                           | <.0001                |
| 6-18                                            | 2053 (40.9)    | 1796 (40.98)                      | 226 (41.62)                                           | 31 (31.63)                                           |                       |
| >=18                                            | 1908 (38.0)    | 1707 (38.95)                      | 171 (31.49)                                           | 30 (30.61)                                           |                       |
| Smoking, n (%)                                  | 1286 (25.6)    | 1136 (25.9)                       | 132 (24.3)                                            | 18 (18.4)                                            | 0.18                  |
| Drinking, n (%)                                 | 1578 (31.4)    | 1364 (31.1)                       | 186 (34.3)                                            | 28 (28.6)                                            | 0.28                  |
| Education, n (%)                                |                |                                   |                                                       |                                                      | 0.69                  |
| Illiteracy/primary                              | 318 (6.3)      | 279 (6.4)                         | 31 (5.7)                                              | 8 (8.2)                                              |                       |

|                                                             |             |             |            |           |         |
|-------------------------------------------------------------|-------------|-------------|------------|-----------|---------|
| Middle school/High school                                   | 2704 (53.8) | 2370 (54.1) | 282 (51.9) | 52 (53.1) |         |
| University or above                                         | 2002 (39.9) | 1734 (39.6) | 230 (42.4) | 38 (38.8) |         |
| Income, n (%)                                               |             |             |            |           | 0.13    |
| ≤3000                                                       | 2415 (48.1) | 2087 (47.6) | 270 (49.7) | 58 (59.2) |         |
| 3001-5000                                                   | 2278 (45.3) | 2002 (45.7) | 243 (44.8) | 33 (33.7) |         |
| >5000                                                       | 331 (6.6)   | 294 (6.7)   | 30 (5.5)   | 7 (7.1)   |         |
| Residence in Tangshan 1-2 years after the earthquake, n (%) | 561 (11.2)  | 45 (1.0)    | 431 (79.4) | 85 (86.7) | <0.0001 |
| Hypertension, n (%)                                         | 2158 (43.0) | 1872 (42.7) | 237 (43.7) | 45 (45.9) | 0.46    |
| Diabetes, n (%)                                             | 550 (11.0)  | 497 (11.3)  | 43 (7.9)   | 10 (10.2) | 0.05    |
| Dyslipidemia, n (%)                                         | 3102 (61.7) | 2696 (61.5) | 343 (63.2) | 63 (64.3) | 0.66    |
| Depression, n (%)                                           | 266 (5.3)   | 215 (4.9)   | 39 (7.2)   | 12 (12.2) | 0.0007  |

**Table 2. Odds ratios for the association between earthquake experience and depression**

|                | <b>no earthquake experience</b> | <b>experience without bereavement</b> | <b>experience with bereavement</b> |
|----------------|---------------------------------|---------------------------------------|------------------------------------|
|                | <b>(n=4383, 87.2%)</b>          | <b>(n=543, 10.8%)</b>                 | <b>(n=98, 2.0%)</b>                |
| <b>Model 1</b> | 1                               | 1.42 (0.99-2.20)                      | 2.46 (1.32-4.59)                   |
| <b>Model 2</b> | 1                               | 1.43 (1.01-2.04)                      | 2.50 (1.34-4.68)                   |
| <b>Model 3</b> | 1                               | 1.61 (0.88 -2.95)                     | 2.88 (1.26 -6.57)                  |
| <b>Model 4</b> | 1                               | 1.69 (0.93 -3.08)                     | 2.82 (1.24 -6.39)                  |

Model 1 refers to the unadjusted model.

Model 2 refers to the model adjusted for gender and age at the time of the earthquake.

Model 3 refers to the model adjusted for gender, age at the time of the earthquake, smoking status, drinking status, education, income, and residence in Tangshan 1-2 years after the earthquake.

Model 4 refers to the model adjusted for gender, age at the time of the earthquake, smoking status, drinking status, education, income, residence in Tangshan 1-2 years after the earthquake, hypertension, diabetes, and dyslipidemia.

1  
2  
3 367 **Figure 1** Odds Ratio of earthquake experience for depression stratified by gender and  
4  
5 368 age at the time of the earthquake.

6  
7 369 Adjusted for gender, age at the time of the earthquake, smoking status, drinking  
8  
9 370 status, education, income, residence in Tangshan 1-2 years after the earthquake,  
10  
11 371 hypertension, diabetes, and dyslipidemia.

12  
13  
14 372

15  
16 373

17  
18  
19  
20  
21  
22  
23  
24  
25  
26  
27  
28  
29  
30  
31  
32  
33  
34  
35  
36  
37  
38  
39  
40  
41  
42  
43  
44  
45  
46  
47  
48  
49  
50  
51  
52  
53  
54  
55  
56  
57  
58  
59  
60

For peer review only

## 374 REFERENCES

- 375 1. WHO W, Mathers C, Fat DM, et al. The global burden of disease: 2004  
376 update. *Irish Medical Journal* 2008;106(1):4.
- 377 2. Krishnan V, Nestler EJ. The molecular neurobiology of depression. *Nature*  
378 2008;455(7215):894-902. doi: 10.1038/nature07455 [published Online  
379 First: 2008/10/17]
- 380 3. Guo J, He H, Fu M, et al. Suicidality associated with PTSD, depression,  
381 and disaster recovery status among adult survivors 8 years after the  
382 2008 Wenchuan earthquake in China. *Psychiatry research*  
383 2017;253:383-90. doi: 10.1016/j.psychres.2017.04.022 [published  
384 Online First: 2017/04/25]
- 385 4. Yang L, Zhao Y, Wang Y, et al. The Effects of Psychological Stress on  
386 Depression. *Current neuropharmacology* 2015;13(4):494-504.  
387 [published Online First: 2015/09/29]
- 388 5. Madden JS. Alcohol and depression. *British journal of hospital medicine*  
389 1993;50(5):261-4. [published Online First: 1993/09/01]
- 390 6. Gu L, Xie J, Long J, et al. Epidemiology of major depressive disorder in  
391 mainland china: a systematic review. *PloS one* 2013;8(6):e65356. doi:  
392 10.1371/journal.pone.0065356 [published Online First: 2013/06/21]
- 393 7. Kessler RC, Berglund P, Demler O, et al. The epidemiology of major  
394 depressive disorder: results from the National Comorbidity Survey  
395 Replication (NCS-R). *Jama* 2003;289(23):3095-105. doi:  
396 10.1001/jama.289.23.3095 [published Online First: 2003/06/19]
- 397 8. van Griensven F, Chakkraband ML, Thienkrua W, et al. Mental health  
398 problems among adults in tsunami-affected areas in southern Thailand.  
399 *Jama* 2006;296(5):537-48. doi: 10.1001/jama.296.5.537 [published  
400 Online First: 2006/08/03]
- 401 9. Fergusson DM, Horwood LJ, Boden JM, et al. Impact of a major disaster on  
402 the mental health of a well-studied cohort. *JAMA psychiatry*  
403 2014;71(9):1025-31. doi: 10.1001/jamapsychiatry.2014.652 [published  
404 Online First: 2014/07/17]



- 1  
2  
3  
4 405 10. Bland SH, O'Leary ES, Farinaro E, et al. Long-term psychological effects  
5 406 of natural disasters. *Psychosomatic medicine* 1996;58(1):18-24.  
6  
7 407 [published Online First: 1996/01/01]  
8  
9 408 11. Bryant RA, Creamer M, O'Donnell M, et al. Acute and Chronic  
10  
11 409 Posttraumatic Stress Symptoms in the Emergence of Posttraumatic  
12  
13 410 Stress Disorder: A Network Analysis. *JAMA psychiatry* 2017;74(2):135-  
14  
15 411 42. doi: 10.1001/jamapsychiatry.2016.3470 [published Online First:  
16  
17 412 2016/12/22]  
18  
19 413 12. Arnberg FK, Eriksson NG, Hultman CM, et al. Traumatic bereavement,  
20  
21 414 acute dissociation, and posttraumatic stress: 14 years after the MS  
22  
23 415 Estonia disaster. *J Trauma Stress* 2011;24(2):183-90. doi:  
24  
25 416 10.1002/jts.20629 [published Online First: 2011/03/29]  
26  
27 417 13. Green BL, Grace MC, Vary MG, et al. Children of disaster in the second  
28  
29 418 decade: a 17-year follow-up of Buffalo Creek survivors. *Journal of the*  
30  
31 419 *American Academy of Child and Adolescent Psychiatry* 1994;33(1):71-  
32  
33 420 9. doi: 10.1097/00004583-199401000-00011 [published Online First:  
34  
35 421 1994/01/01]  
36  
37 422 14. Galletly C, Van Hooff M, McFarlane A. Psychotic symptoms in young  
38  
39 423 adults exposed to childhood trauma--a 20 year follow-up study.  
40  
41 424 *Schizophrenia research* 2011;127(1-3):76-82. doi:  
42  
43 425 10.1016/j.schres.2010.12.010 [published Online First: 2011/01/25]  
44  
45 426 15. Boe HJ, Holgersen KH, Holen A. Mental health outcomes and predictors  
46  
47 427 of chronic disorders after the North Sea oil rig disaster: 27-year  
48  
49 428 longitudinal follow-up study. *The Journal of nervous and mental*  
50  
51 429 *disease* 2011;199(1):49-54. doi: 10.1097/NMD.0b013e31820446a8  
52  
53 430 [published Online First: 2011/01/06]  
54  
55 431 16. Hull AM, Alexander DA, Klein S. Survivors of the Piper Alpha oil platform  
56  
57 432 disaster: long-term follow-up study. *The British journal of psychiatry :*  
58  
59 433 *the journal of mental science* 2002;181:433-8. [published Online First:  
60  
434 2002/11/02]  
435 17. Norris F PJ, Kaniasty K. Individual and Community Responses to Trauma  
436 and Disaster: Individual and community reactions to the Kentucky

- 1  
2  
3  
4 437 floods: findings from a longitudinal study of older adults. *Cambridge*  
5 438 *University Press* 1994  
6  
7 439 18. Shaw JA. Children, adolescents and trauma. *The Psychiatric quarterly*  
8 440 2000;71(3):227-43. [published Online First: 2000/08/10]  
9  
10 441 19. Guo J, He H, Qu Z, et al. Post-traumatic stress disorder and depression  
11 442 among adult survivors 8 years after the 2008 Wenchuan earthquake in  
12 443 China. *Journal of affective disorders* 2017;210:27-34. doi:  
13 444 10.1016/j.jad.2016.12.009 [published Online First: 2016/12/23]  
14  
15 445 20. Sheng ZY. Medical support in the Tangshan earthquake: a review of the  
16 446 management of mass casualties and certain major injuries. *The*  
17 447 *Journal of trauma* 1987;27(10):1130-5. [published Online First:  
18 448 1987/10/01]  
19  
20 449 21. An C, Zhang Y, Yu L, et al. Long-term impact of earthquake stress on  
21 450 fasting glucose control and diabetes prevalence among Chinese adults  
22 451 of Tangshan. *International journal of clinical and experimental medicine*  
23 452 2014;7(11):4441-7. [published Online First: 2015/01/01]  
24  
25 453 22. Ji C, Li Y, Cui L, et al. Prenatal Earthquake Exposure and Midlife Uric Acid  
26 454 Levels Among Chinese Adults. *Arthritis care & research*  
27 455 2017;69(5):703-08. doi: 10.1002/acr.22973 [published Online First:  
28 456 2016/07/28]  
29  
30 457 23. Meng X, Brunet A, Turecki G, et al. Risk factor modifications and  
31 458 depression incidence: a 4-year longitudinal Canadian cohort of the  
32 459 Montreal Catchment Area Study. *BMJ open* 2017;7(6):e015156. doi:  
33 460 10.1136/bmjopen-2016-015156 [published Online First: 2017/06/12]  
34  
35 461 24. Guo YC, Zhou Y, Gao X, et al. Association between Nonalcoholic Fatty  
36 462 Liver Disease and Carotid Artery Disease in a Community-Based  
37 463 Chinese Population: A Cross-Sectional Study. *Chinese medical journal*  
38 464 2018;131(19):2269-76. doi: 10.4103/0366-6999.241797 [published  
39 465 Online First: 2018/09/25]  
40  
41 466 25. Song Q, Liu X, Wang A, et al. Associations between non-traditional lipid  
42 467 measures and risk for type 2 diabetes mellitus in a Chinese community  
43 468 population: a cross-sectional study. *Lipids in health and disease*  
44  
45  
46  
47  
48  
49  
50  
51  
52  
53  
54  
55  
56  
57  
58  
59  
60

- 1  
2  
3  
4 469 2016;15:70. doi: 10.1186/s12944-016-0239-y [published Online First:  
5 470 2016/04/06]  
6  
7 471 26. Hao Z, Zhang Y, Li Y, et al. The Association between Ideal Cardiovascular  
8  
9 472 Health Metrics and Extracranial Carotid Artery Stenosis in a Northern  
10  
11 473 Chinese Population: A Cross-Sectional Study. *Scientific reports*  
12  
13 474 2016;6:31720. doi: 10.1038/srep31720 [published Online First:  
14  
15 475 2016/08/31]  
16 476 27. Han X, Yang Y, Chen Y, et al. Association between insomnia and atrial  
17  
18 477 fibrillation in a Chinese population: A cross-sectional study. *Clinical*  
19  
20 478 *cardiology* 2017;40(9):765-69. doi: 10.1002/clc.22731 [published  
21  
22 479 Online First: 2017/06/01]  
23 480 28. Wang Y, Ge S, Yan Y, et al. China suboptimal health cohort study:  
24  
25 481 rationale, design and baseline characteristics. *Journal of translational*  
26  
27 482 *medicine* 2016;14(1):291. doi: 10.1186/s12967-016-1046-y [published  
28  
29 483 Online First: 2016/10/16]  
30 484 29. Radloff LS. The CES-D Scale. *Applied Psychological Measurement*  
31  
32 485 1977;1(3):385-401.  
33 486 30. Chien CP, Cheng TA. Depression in Taiwan: epidemiological survey  
34  
35 487 utilizing CES-D. *Seishin shinkeigaku zasshi = Psychiatria et neurologia*  
36  
37 488 *Japonica* 1985;87(5):335-8. [published Online First: 1985/01/01]  
38  
39 489 31. Zhang Y, Ting RZ, Lam MH, et al. Measuring depression with CES-D in  
40  
41 490 Chinese patients with type 2 diabetes: the validity and its comparison  
42  
43 491 to PHQ-9. *BMC psychiatry* 2015;15:198. doi: 10.1186/s12888-015-  
44  
45 492 0580-0 [published Online First: 2015/08/19]  
46 493 32. Zhang J, Sun W, Kong Y, et al. Reliability and validity of the Center for  
47  
48 494 Epidemiological Studies Depression Scale in 2 special adult samples  
49  
50 495 from rural China. *Comprehensive psychiatry* 2012;53(8):1243-51. doi:  
51  
52 496 10.1016/j.comppsy.2012.03.015 [published Online First: 2012/04/24]  
53 497 33. Wang F, Liu J, Liu L, et al. The status and correlates of depression and  
54  
55 498 anxiety among breast-cancer survivors in Eastern China: a population-  
56  
57 499 based, cross-sectional case-control study. *BMC public health*

- 1  
2  
3  
4 500 2014;14:326. doi: 10.1186/1471-2458-14-326 [published Online First:  
5 501 2014/04/09]  
6  
7 502 34. van Os J, Linscott RJ, Myin-Germeys I, et al. A systematic review and  
8  
9 503 meta-analysis of the psychosis continuum: evidence for a psychosis  
10 504 proneness-persistence-impairment model of psychotic disorder.  
11  
12 505 *Psychological medicine* 2009;39(2):179-95. doi:  
13  
14 506 10.1017/s0033291708003814 [published Online First: 2008/07/09]  
15  
16 507 35. Belmaker RH, Agam G. Major depressive disorder. *The New England*  
17  
18 508 *journal of medicine* 2008;358(1):55-68. doi: 10.1056/NEJMra073096  
19  
20 509 [published Online First: 2008/01/04]  
21  
22 510 36. Green BL, Lindy JD, Grace MC, et al. Chronic posttraumatic stress  
23  
24 511 disorder and diagnostic comorbidity in a disaster sample. *The Journal*  
25  
26 512 *of nervous and mental disease* 1992;180(12):760-6. [published Online  
27  
28 513 First: 1992/12/01]  
29  
30 514 37. McFarlane AC. The prevalence and longitudinal course of PTSD.  
31  
32 515 Implications for the neurobiological models of PTSD. *Annals of the*  
33  
34 516 *New York Academy of Sciences* 1997;821:10-23. [published Online  
35  
36 517 First: 1997/06/21]  
37  
38 518 38. Long J, Huang X, Liao Y, et al. Prediction of post-earthquake depressive  
39  
40 519 and anxiety symptoms: a longitudinal resting-state fMRI study.  
41  
42 520 *Scientific reports* 2014;4:6423. doi: 10.1038/srep06423 [published  
43  
44 521 Online First: 2014/09/23]  
45  
46 522 39. Green BL, Korol M, Grace MC, et al. Children and disaster: age, gender,  
47  
48 523 and parental effects on PTSD symptoms. *Journal of the American*  
49  
50 524 *Academy of Child and Adolescent Psychiatry* 1991;30(6):945-51. doi:  
51  
52 525 10.1097/00004583-199111000-00012 [published Online First:  
53  
54 526 1991/11/01]  
55  
56 527 40. McFarlane AC. Posttraumatic phenomena in a longitudinal study of  
57  
58 528 children following a natural disaster. *Journal of the American Academy*  
59  
60 529 *of Child and Adolescent Psychiatry* 1987;26(5):764-9. doi:  
61  
62 530 10.1097/00004583-198709000-00025 [published Online First:  
63  
64 531 1987/09/01]

- 1  
2  
3  
4 532 41. Guo J, Wu P, Tian D, et al. Post-traumatic stress disorder among adult  
5 533 survivors of the Wenchuan earthquake in China: a repeated cross-  
6 534 sectional study. *J Anxiety Disord* 2014;28(1):75-82. doi:  
7 535 10.1016/j.janxdis.2013.12.001 [published Online First: 2014/01/07]  
8  
9 536 42. Ye Y, Fan F, Li L, et al. Trajectory and predictors of depressive symptoms  
10 537 among adolescent survivors following the Wenchuan earthquake in  
11 538 China: a cohort study. *Social psychiatry and psychiatric epidemiology*  
12 539 2014;49(6):943-52. doi: 10.1007/s00127-014-0821-4 [published Online  
13 540 First: 2014/01/17]  
14  
15 541 43. Matsubara C, Murakami H, Imai K, et al. Prevalence and risk factors for  
16 542 depressive reaction among resident survivors after the tsunami  
17 543 following the Great East Japan Earthquake, March 11, 2011. *PloS one*  
18 544 2014;9(10):e109240. doi: 10.1371/journal.pone.0109240 [published  
19 545 Online First: 2014/10/04]  
20  
21 546 44. Cerda M, Paczkowski M, Galea S, et al. Psychopathology in the aftermath  
22 547 of the Haiti earthquake: a population-based study of posttraumatic  
23 548 stress disorder and major depression. *Depression and anxiety*  
24 549 2013;30(5):413-24. doi: 10.1002/da.22007 [published Online First:  
25 550 2012/11/06]  
26  
27 551 45. North CS, Pfefferbaum B. Mental health response to community disasters:  
28 552 a systematic review. *Jama* 2013;310(5):507.  
29  
30 553 46. Hikichi H, Aida J, Tsuboya T, et al. Can Community Social Cohesion  
31 554 Prevent Posttraumatic Stress Disorder in the Aftermath of a Disaster?  
32 555 A Natural Experiment From the 2011 Tohoku Earthquake and  
33 556 Tsunami. *Am J Epidemiol* 2016;183(10):902-10. doi:  
34 557 10.1093/aje/kwv335 [published Online First: 2016/03/31]  
35  
36 558 47. Salcioglu E, Basoglu M. Psychological effects of earthquakes in children:  
37 559 prospects for brief behavioral treatment. *World journal of pediatrics :*  
38 560 *WJP* 2008;4(3):165-72. doi: 10.1007/s12519-008-0032-8 [published  
39 561 Online First: 2008/10/01]  
40  
41 562  
42  
43  
44  
45  
46  
47  
48  
49  
50  
51  
52  
53  
54  
55  
56  
57  
58  
59  
60

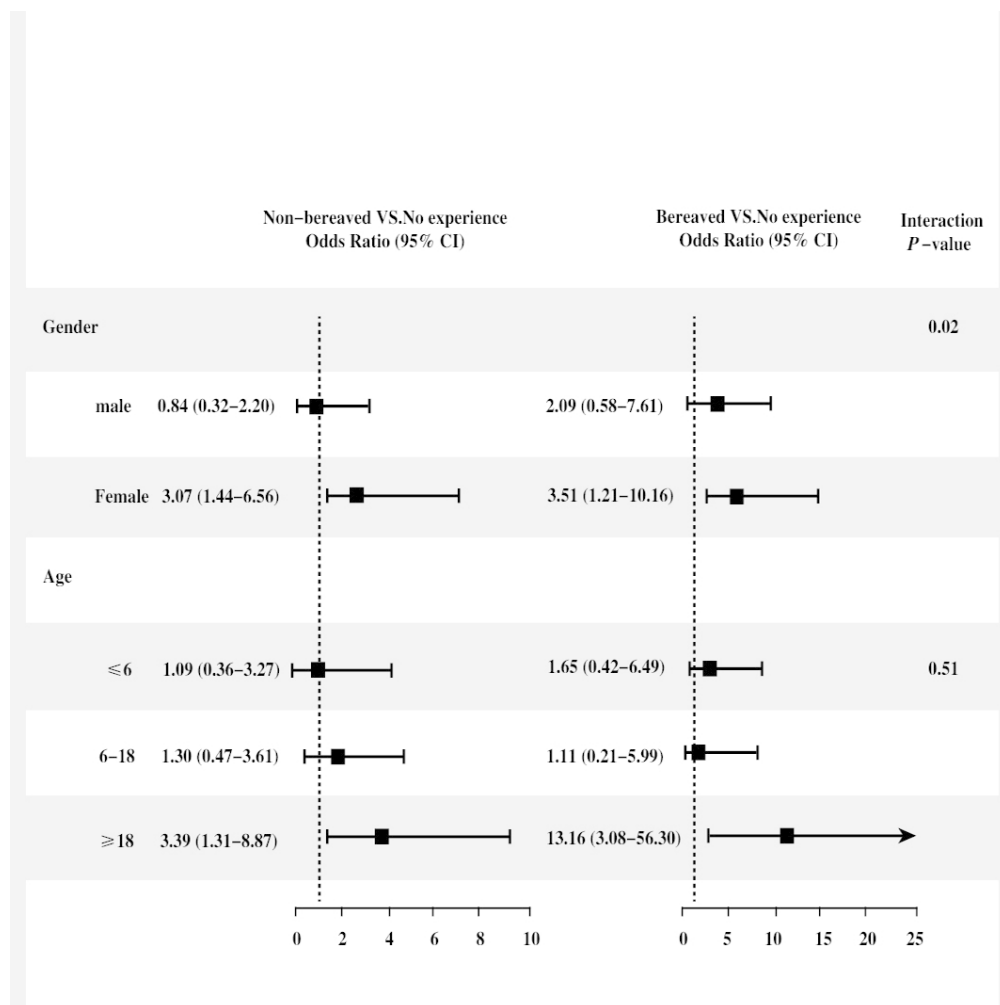

Figure 1 Odds Ratio of earthquake experience for depression stratified by gender and age at the time of the earthquake.

Adjusted for gender, age at the time of the earthquake, smoking status, drinking status, education, income, residence in Tangshan 1-2 years after the earthquake, hypertension, diabetes, and dyslipidemia.

90x90mm (300 x 300 DPI)

## STROBE Statement—checklist of items that should be included in reports of observational studies

|                              | Item No. | Recommendation                                                                                                                                                                                                                                                                                                                                                                                                                                                         | Page No. | Relevant text from manuscript |
|------------------------------|----------|------------------------------------------------------------------------------------------------------------------------------------------------------------------------------------------------------------------------------------------------------------------------------------------------------------------------------------------------------------------------------------------------------------------------------------------------------------------------|----------|-------------------------------|
| <b>Title and abstract</b>    | 1        | (a) Indicate the study's design with a commonly used term in the title or the abstract                                                                                                                                                                                                                                                                                                                                                                                 | 1        | Line 1-2                      |
|                              |          | (b) Provide in the abstract an informative and balanced summary of what was done and what was found                                                                                                                                                                                                                                                                                                                                                                    | 3-4      | Line 44-69                    |
| <b>Introduction</b>          |          |                                                                                                                                                                                                                                                                                                                                                                                                                                                                        |          |                               |
| Background/rationale         | 2        | Explain the scientific background and rationale for the investigation being reported                                                                                                                                                                                                                                                                                                                                                                                   | 6-7      | Line 81-112                   |
| Objectives                   | 3        | State specific objectives, including any prespecified hypotheses                                                                                                                                                                                                                                                                                                                                                                                                       | 7        | Line 113-118                  |
| <b>Methods</b>               |          |                                                                                                                                                                                                                                                                                                                                                                                                                                                                        |          |                               |
| Study design                 | 4        | Present key elements of study design early in the paper                                                                                                                                                                                                                                                                                                                                                                                                                | 8        | Line 141-142                  |
| Setting                      | 5        | Describe the setting, locations, and relevant dates, including periods of recruitment, exposure, follow-up, and data collection                                                                                                                                                                                                                                                                                                                                        | 7-8      | Line 122-135                  |
| Participants                 | 6        | (a) <i>Cohort study</i> —Give the eligibility criteria, and the sources and methods of selection of participants. Describe methods of follow-up<br><i>Case-control study</i> —Give the eligibility criteria, and the sources and methods of case ascertainment and control selection. Give the rationale for the choice of cases and controls<br><i>Cross-sectional study</i> —Give the eligibility criteria, and the sources and methods of selection of participants | 8        | Line 136-142                  |
|                              |          | (b) <i>Cohort study</i> —For matched studies, give matching criteria and number of exposed and unexposed<br><i>Case-control study</i> —For matched studies, give matching criteria and the number of controls per case                                                                                                                                                                                                                                                 |          | NA                            |
| Variables                    | 7        | Clearly define all outcomes, exposures, predictors, potential confounders, and effect modifiers. Give diagnostic criteria, if applicable                                                                                                                                                                                                                                                                                                                               | 8-10     | Line 148-195                  |
| Data sources/<br>measurement | 8*       | For each variable of interest, give sources of data and details of methods of assessment (measurement). Describe comparability of assessment methods if there is more than one group                                                                                                                                                                                                                                                                                   | 8-9      | Line 148-169                  |
| Bias                         | 9        | Describe any efforts to address potential sources of bias                                                                                                                                                                                                                                                                                                                                                                                                              | 11       | Line 203-209                  |
| Study size                   | 10       | Explain how the study size was arrived at                                                                                                                                                                                                                                                                                                                                                                                                                              | 8        | Line 136-142                  |

Continued on next page



|                                                                                                                  |     |                                                                                                                                                                                                                                                                                                           |       |                                                                                                                                                                                                              |       |                       |
|------------------------------------------------------------------------------------------------------------------|-----|-----------------------------------------------------------------------------------------------------------------------------------------------------------------------------------------------------------------------------------------------------------------------------------------------------------|-------|--------------------------------------------------------------------------------------------------------------------------------------------------------------------------------------------------------------|-------|-----------------------|
| Quantitative variables                                                                                           | 11  | Explain how quantitative variables were handled in the analyses. If applicable, describe which groupings were chosen and why                                                                                                                                                                              | 10    | Line 198-202                                                                                                                                                                                                 |       |                       |
| Statistical methods                                                                                              | 12  | (a) Describe all statistical methods, including those used to control for confounding                                                                                                                                                                                                                     | 10-11 | Line 198-219                                                                                                                                                                                                 |       |                       |
|                                                                                                                  |     | (b) Describe any methods used to examine subgroups and interactions                                                                                                                                                                                                                                       | 11    | Line 210-216                                                                                                                                                                                                 |       |                       |
|                                                                                                                  |     | (c) Explain how missing data were addressed                                                                                                                                                                                                                                                               | 8     | Line 137-141                                                                                                                                                                                                 |       |                       |
|                                                                                                                  |     | (d) <i>Cohort study</i> —If applicable, explain how loss to follow-up was addressed<br><i>Case-control study</i> —If applicable, explain how matching of cases and controls was addressed<br><i>Cross-sectional study</i> —If applicable, describe analytical methods taking account of sampling strategy | 7     | Line 125-126                                                                                                                                                                                                 |       |                       |
|                                                                                                                  |     | (e) Describe any sensitivity analyses                                                                                                                                                                                                                                                                     |       | NA                                                                                                                                                                                                           |       |                       |
| <b>Results</b>                                                                                                   |     |                                                                                                                                                                                                                                                                                                           |       |                                                                                                                                                                                                              |       |                       |
| Participants                                                                                                     | 13* | (a) Report numbers of individuals at each stage of study—eg numbers potentially eligible, examined for eligibility, confirmed eligible, included in the study, completing follow-up, and analysed                                                                                                         | 11-12 | Line 229-232                                                                                                                                                                                                 |       |                       |
|                                                                                                                  |     | (b) Give reasons for non-participation at each stage                                                                                                                                                                                                                                                      | 8     | Line 136-142                                                                                                                                                                                                 |       |                       |
|                                                                                                                  |     | (c) Consider use of a flow diagram                                                                                                                                                                                                                                                                        |       | NA                                                                                                                                                                                                           |       |                       |
| Descriptive data                                                                                                 | 14* | (a) Give characteristics of study participants (eg demographic, clinical, social) and information on exposures and potential confounders                                                                                                                                                                  | 11-12 | Line 228-240, Table 1                                                                                                                                                                                        |       |                       |
|                                                                                                                  |     | (b) Indicate number of participants with missing data for each variable of interest                                                                                                                                                                                                                       | 8     | Line 137-141                                                                                                                                                                                                 |       |                       |
|                                                                                                                  |     | (c) <i>Cohort study</i> —Summarise follow-up time (eg, average and total amount)                                                                                                                                                                                                                          |       | NA                                                                                                                                                                                                           |       |                       |
| Outcome data                                                                                                     | 15* | <i>Cohort study</i> —Report numbers of outcome events or summary measures over time<br><i>Case-control study</i> —Report numbers in each exposure category, or summary measures of exposure<br><i>Cross-sectional study</i> —Report numbers of outcome events or summary measures                         | 12    | Line 238-240                                                                                                                                                                                                 |       |                       |
|                                                                                                                  |     | Main results                                                                                                                                                                                                                                                                                              | 16    | (a) Give unadjusted estimates and, if applicable, confounder-adjusted estimates and their precision (eg, 95% confidence interval). Make clear which confounders were adjusted for and why they were included | 12-13 | Line 243-249, Table 2 |
|                                                                                                                  |     |                                                                                                                                                                                                                                                                                                           |       | (b) Report category boundaries when continuous variables were categorized                                                                                                                                    | 9     | Line 176-179, Table 1 |
| (c) If relevant, consider translating estimates of relative risk into absolute risk for a meaningful time period |     |                                                                                                                                                                                                                                                                                                           |       | NA                                                                                                                                                                                                           |       |                       |

Continued on next page



|                          |    |                                                                                                                                                                            |       |              |
|--------------------------|----|----------------------------------------------------------------------------------------------------------------------------------------------------------------------------|-------|--------------|
| Other analyses           | 17 | Report other analyses done—eg analyses of subgroups and interactions, and sensitivity analyses                                                                             | 12-13 | Line 252-259 |
| <b>Discussion</b>        |    |                                                                                                                                                                            |       |              |
| Key results              | 18 | Summarise key results with reference to study objectives                                                                                                                   | 13    | Line 262-267 |
| Limitations              | 19 | Discuss limitations of the study, taking into account sources of potential bias or imprecision. Discuss both direction and magnitude of any potential bias                 | 16    | Line 335-351 |
| Interpretation           | 20 | Give a cautious overall interpretation of results considering objectives, limitations, multiplicity of analyses, results from similar studies, and other relevant evidence | 13-17 | Line 268-360 |
| Generalisability         | 21 | Discuss the generalisability (external validity) of the study results                                                                                                      | 16    | Line 339-347 |
| <b>Other information</b> |    |                                                                                                                                                                            |       |              |
| Funding                  | 22 | Give the source of funding and the role of the funders for the present study and, if applicable, for the original study on which the present article is based              | 18    | Line 377-380 |

\*Give information separately for cases and controls in case-control studies and, if applicable, for exposed and unexposed groups in cohort and cross-sectional studies.

**Note:** An Explanation and Elaboration article discusses each checklist item and gives methodological background and published examples of transparent reporting. The STROBE checklist is best used in conjunction with this article (freely available on the Web sites of PLoS Medicine at <http://www.plosmedicine.org/>, Annals of Internal Medicine at <http://www.annals.org/>, and Epidemiology at <http://www.epidem.com/>). Information on the STROBE Initiative is available at [www.strobe-statement.org](http://www.strobe-statement.org).

# BMJ Open

## The Association between Earthquake Experience and Depression 37 Years after the Tangshan Earthquake: A Cross-sectional Study

|                                 |                                                                                                                                                                                                                                                                                                                                                                                                                                                                                                                                                                                                                                                                                                                                                                                                                                                                                                                                                                                                                                                                                                                                                          |
|---------------------------------|----------------------------------------------------------------------------------------------------------------------------------------------------------------------------------------------------------------------------------------------------------------------------------------------------------------------------------------------------------------------------------------------------------------------------------------------------------------------------------------------------------------------------------------------------------------------------------------------------------------------------------------------------------------------------------------------------------------------------------------------------------------------------------------------------------------------------------------------------------------------------------------------------------------------------------------------------------------------------------------------------------------------------------------------------------------------------------------------------------------------------------------------------------|
| Journal:                        | <i>BMJ Open</i>                                                                                                                                                                                                                                                                                                                                                                                                                                                                                                                                                                                                                                                                                                                                                                                                                                                                                                                                                                                                                                                                                                                                          |
| Manuscript ID                   | bmjopen-2018-026110.R2                                                                                                                                                                                                                                                                                                                                                                                                                                                                                                                                                                                                                                                                                                                                                                                                                                                                                                                                                                                                                                                                                                                                   |
| Article Type:                   | Research                                                                                                                                                                                                                                                                                                                                                                                                                                                                                                                                                                                                                                                                                                                                                                                                                                                                                                                                                                                                                                                                                                                                                 |
| Date Submitted by the Author:   | 01-Apr-2019                                                                                                                                                                                                                                                                                                                                                                                                                                                                                                                                                                                                                                                                                                                                                                                                                                                                                                                                                                                                                                                                                                                                              |
| Complete List of Authors:       | Gao, Xing; Chinese Academy of Medical science, Institute of Medical Information<br>Leng, Yue; Global Brain Health Institute , Department of Psychiatry, University of California<br>Guo, Yuchen; Chinese Academy of Medical Science, Institute of Medical Information<br>Yang, Jichun; Department of Physiology and Pathophysiology, School of Basic Medical Sciences Key Laboratory of Molecular Cardiovascular Science of the Ministry of Education Center for Non-coding RNA Medicine Peking University Health Science Center<br>Cui, Qinghua; Department of Biomedical Informatics, School of Basic Medical Sciences Key Laboratory of Molecular Cardiovascular Science of the Ministry of Education Center for Non-coding RNA Medicine Peking University Health Science Center<br>Geng, Bin ; Hypertension Center, Fuwai Hospital, Chinese Academy of Medical Sciences and Peking Union Medical College, State Key Laboratory of Cardiovascular Disease<br>Hu, Hongpu; Chinese Academy of Medical science, Institute of Medical Information<br>zhou, Yong; Sanbo Brain Institute, Sanbo Brain Hospital, Capital Medical University, Beijing, China. |
| <b>Primary Subject Heading</b>: | Epidemiology                                                                                                                                                                                                                                                                                                                                                                                                                                                                                                                                                                                                                                                                                                                                                                                                                                                                                                                                                                                                                                                                                                                                             |
| Secondary Subject Heading:      | Mental health, Public health, Health services research                                                                                                                                                                                                                                                                                                                                                                                                                                                                                                                                                                                                                                                                                                                                                                                                                                                                                                                                                                                                                                                                                                   |
| Keywords:                       | Depression & mood disorders < PSYCHIATRY, Earthquake, Association, EPIDEMIOLOGY                                                                                                                                                                                                                                                                                                                                                                                                                                                                                                                                                                                                                                                                                                                                                                                                                                                                                                                                                                                                                                                                          |
|                                 |                                                                                                                                                                                                                                                                                                                                                                                                                                                                                                                                                                                                                                                                                                                                                                                                                                                                                                                                                                                                                                                                                                                                                          |

SCHOLARONE™  
Manuscripts

1  
2  
3 1 **The Association between Earthquake Experience and Depression 37 Years after**  
4  
5 2 **the Tangshan Earthquake: A Cross-sectional Study**

6  
7  
8 3 Xing Gao<sup>1</sup>, Yue Leng<sup>2</sup>, YuchenGuo<sup>1</sup>, Jichun Yang<sup>3</sup>, Qinghua Cui<sup>3</sup>, Bin Geng<sup>4</sup>,  
9  
10 4 Hongpu Hu<sup>1</sup>, Yong Zhou<sup>5</sup>

11  
12  
13  
14  
15 6 **Corresponding Author**

16  
17 7 1 Hong-Pu Hu, MD, PhD, Professor of Institute of Medical Information, Chinese  
18  
19 8 Academy of Medical Sciences/Peking Union Medical College, Beijing

20  
21 9 Address: Yabao Road 3, CN-100020 Beijing, China

22  
23  
24 10 Tel./Fax: 86-10-52328610/86-10-52328870 Email: hu.hongpu@imicams.ac.cn

25  
26 11 2 Yong Zhou, MD, PhD, Associate Research Fellow, Sanbo Brain Institute, Sanbo  
27  
28 12 Brain Hospital, Capital Medical University, Beijing, China.

29  
30 13 Address: No 50Yikesong Street of Fragrant Hills, Haidian District, Beijing, 100093,  
31  
32 14 China.

33  
34  
35 15 Tel./Fax: 86-10-62859629 Email: yongzhou78214@163.com

36  
37  
38  
39  
40 17 **Authors' Affiliation**

41  
42 18 1 Institute of Medical Information, Chinese Academy of Medical Sciences/Peking  
43  
44 19 Union Medical College, Beijing, P.R. China

45  
46  
47 20 2 Global Brain Health Institute, Department of Psychiatry, University of California,  
48  
49 21 San Francisco, USA

50  
51 22 3 Department of Physiology and Pathophysiology, School of Basic Medical Sciences,  
52  
53 23 Key Laboratory of Molecular Cardiovascular Science of the Ministry of Education  
54  
55 24 Center for Non-coding RNA Medicine, Peking University Health Science Center,  
56  
57 25 Beijing, P.R. China  
58  
59  
60

1  
2  
3 26 4 Hypertension Center, Fuwai Hospital, Chinese Academy of Medical Sciences and  
4  
5 27 Peking Union Medical College, State Key Laboratory of Cardiovascular Disease,  
6  
7 28 Beijing, P.R. China  
8  
9

10 29 5 Sanbo Brain Institute, Sanbo Brain Hospital, Capital Medical University, Beijing,  
11  
12 30 P.R. China  
13

14  
15 31 **Joint first authorship**  
16

17 32 Yue Leng, M.Phil, PhD, Atlantic Fellow, Global Brain Health Institute, Department  
18  
19 33 of Psychiatry, University of California, San Francisco, USA  
20  
21

22 34

23  
24 35 **Word count: 3611**  
25  
26  
27  
28  
29  
30  
31  
32  
33  
34  
35  
36  
37  
38  
39  
40  
41  
42  
43  
44  
45  
46  
47  
48  
49  
50  
51  
52  
53  
54  
55  
56  
57  
58  
59  
60

1  
2  
3 36 **ABSTRACT**  
4

5 37 **Objective** To investigate the association between the Tangshan earthquake and the  
6  
7  
8 38 risk of depression after 37 years.  
9

10 39 **Design and setting** A cross-sectional study conducted in Tangshan from 2013 to  
11  
12 40 2014.  
13

14 41 **Participants** The sample included 5024 participants born before July 28, 1976, the  
15  
16  
17 42 date of the Tangshan earthquake, with available data on their earthquake experiences  
18  
19 43 and depression 37 years after the earthquake.  
20

21 44 **Outcomes and variables** The outcome was depression measured using the Center for  
22  
23  
24 45 Epidemiological Study and Depression Scale (CES-D). The independent variable was  
25  
26 46 earthquake experience, which was classified into 3 groups: no earthquake experience,  
27  
28 47 earthquake experience without bereavement, and earthquake experience with  
29  
30  
31 48 bereavement. Multivariable logistic regression analysis was used to evaluate the  
32  
33 49 association between earthquake experience and depression after adjusting for gender,  
34  
35 50 age at the time of the earthquake, smoking status, drinking status, education, income,  
36  
37  
38 51 residence in Tangshan 1-2 years after the earthquake, hypertension, diabetes, and  
39  
40 52 dyslipidaemia.  
41

42 53 **Results** Of the 5024 participants, 641 had experienced the Tangshan earthquake, and  
43  
44 54 98 had experienced bereavement due to the earthquake. As of 37 years after the  
45  
46  
47 55 earthquake, participants who had experienced the earthquake (with or without  
48  
49 56 bereavement) had a higher prevalence of depression than those without earthquake  
50  
51 57 experience (12.2%, 7.2% vs. 4.9%, respectively). Survivors who had lost relatives  
52  
53 58 during the earthquake were nearly 3 times (odds ratio 2.82, 95% confidence interval  
54  
55 59 1.24-6.39) as likely to have depression as those who had not experienced the  
56  
57  
58 60 earthquake. A statistically significant association between the earthquake and  
59  
60

1  
2  
3 61 depression was found in women but not men and in individuals who were over 18  
4  
5 62 years of age at the time of the earthquake.  
6  
7

8 63 **Conclusions** Thirty-seven years after the Tangshan earthquake, earthquake  
9  
10 64 experience was associated with depression among bereaved survivors, women and  
11  
12 65 individuals over 18 years old at the time.  
13  
14

15 66

16  
17 67 **Word count:290**  
18  
19  
20  
21  
22  
23  
24  
25  
26  
27  
28  
29  
30  
31  
32  
33  
34  
35  
36  
37  
38  
39  
40  
41  
42  
43  
44  
45  
46  
47  
48  
49  
50  
51  
52  
53  
54  
55  
56  
57  
58  
59  
60

For peer review only

1  
2  
3 68 **Strengths and limitations of this study**  
4

5 69 ● The study investigated the long-term risk of depression 37 years after a major  
6  
7  
8 70 earthquake.

9  
10 71 ● Participants were stratified by gender and age at the time of the earthquake.

11  
12 72 ● We were unable to control for every event or factor, such as adverse childhood  
13  
14 73 experiences, other bereavement or current psychological stressors.

15  
16  
17 74 ● Only participants who were still alive 37 years after the earthquake were able to  
18  
19 75 participate in the study.  
20  
21  
22  
23  
24  
25  
26  
27  
28  
29  
30  
31  
32  
33  
34  
35  
36  
37  
38  
39  
40  
41  
42  
43  
44  
45  
46  
47  
48  
49  
50  
51  
52  
53  
54  
55  
56  
57  
58  
59  
60

## 76 INTRODUCTION

77 Depression is predicted to be a major reason for disability around the world by 2030,  
78 according to the World Health Organization<sup>1</sup>. In addition, the chronic and debilitating  
79 nature of depression complicates the prognosis of chronic diseases, aggravates various  
80 diseases and may lead to suicide<sup>2-4</sup>. Evidence shows that depression is related to  
81 demographic characteristics, living habits, education, income, and health status<sup>5-7</sup>.

82 Participants exposed to disasters at an early life stage are at an increased risk of  
83 depression in the short term (1-4 years), independent of age, gender, income,  
84 education and other confounders<sup>8-10</sup>. Additionally, studies report that some survivors  
85 have psychological problems in the immediate aftermath of disaster trauma; most of  
86 these reactions abate over time, and only a minority of survivors develop a  
87 long-standing disorder<sup>11 12</sup>. Therefore, long-term evidence is essential to evaluate the  
88 effects of disaster on depression.

89 Findings regarding the long-term impact of disasters on mental health have been  
90 mixed. Several studies have reported no significant differences<sup>13 14</sup>, but others have  
91 revealed more psychological problems in exposed individuals than in non-exposed  
92 individuals for more than a decade after disasters<sup>10 15 16</sup>. Moreover, evidence shows  
93 that such effects are increased if survivors suffer from bereavement<sup>10 12</sup>. Additionally,  
94 the association between earthquakes and depression may vary according to age or  
95 gender. Studies indicate that overall levels of psychological symptoms may vary  
96 among children, adolescents, and adults due to differences in physiology and  
97 cognition<sup>17 18</sup>. In response to disaster, women appear develop more intense and  
98 longer-lasting psychological symptoms than men<sup>13 19</sup>. However, very few of these  
99 studies investigated the long-term effect of earthquakes on depression risk in the  
100 Chinese population.



1  
2  
3 101 Our study provides a suitable setting for investigating the long-term impact of  
4  
5 102 earthquakes on depression in the Chinese population. The Tangshan earthquake,  
6  
7 103 which occurred in 1976, had a magnitude of 7.8 on the Richter scale<sup>20</sup>. The  
8  
9 104 earthquake caused 242,769 deaths and left 164,851 people severely injured,  
10  
11 105 representing the strongest and deadliest natural disaster in the twentieth  
12  
13 106 century<sup>20</sup>. Since the earthquake, numerous studies have examined the effects of the  
14  
15 107 event on physical health outcomes. These studies report increased risks of diabetes,  
16  
17 108 cardiovascular disease, and elevated levels of uric acid among survivors of the  
18  
19 109 Tangshan earthquake even at timepoints more than 30 years later<sup>21-23</sup>. However, no  
20  
21 110 study to date has examined the long-term effect of the Tangshan earthquake on the  
22  
23 111 risk of depression.

24  
25  
26 112 The aim of our study was to examine the long-term effect of disaster on depression 37  
27  
28 113 years later. We hypothesized that the earthquake-exposed group would be more likely  
29  
30 114 than the non-exposed group to exhibit depression. Furthermore, we expected that  
31  
32 115 bereaved survivors would be more likely to experience depression than non-bereaved  
33  
34 116 survivors. Considering that age and gender may confound the association between  
35  
36 117 earthquake experience and depression, we also performed an analysis stratified by age  
37  
38 118 and gender.

39  
40  
41  
42  
43  
44  
45 119

## 46 120 **METHODS**

### 47 121 **Study participants**

48  
49 122 The participants were selected from the Jidong Cohort, an ongoing community-based  
50  
51 123 prospective study in Chinese adults<sup>24</sup>. The Jidong community is located in the  
52  
53 124 Caofeidian district of Tangshan City, which is approximately 60 km from the  
54  
55 125 epicentre of the Tangshan earthquake. Cluster sampling was used to select  
56  
57  
58  
59  
60

1  
2  
3 126 participants. From July 2013 to August 2014, a total of 9078 residents in the Jidong  
4  
5 127 community were recruited to participate in the cohort. Data regarding demographic  
6  
7 128 and behavioural characteristics, insomnia, cognition, depression, and biochemical  
8  
9 129 indicators have been collected from this cohort at annual follow-ups since  
10  
11 130 2013<sup>25-27</sup>. These data were collected using a set of self-administered questionnaires  
12  
13 131 (including the Center for Epidemiological Study and Depression Scale (CES-D)) with  
14  
15 132 the assistance of well-trained research nurses during face-to-face interviews.  
16  
17 133 Biomedical variables were collected by physical examinations and laboratory  
18  
19 134 assessments. Research on this cohort originally examined sub-health and later  
20  
21 135 expanded to examine depression, cardiovascular health, cerebrovascular health and  
22  
23 136 other areas<sup>25-28</sup>.

24  
25  
26  
27  
28 137 In the current study, we excluded 4054 of the 9078 candidate participants according  
29  
30 138 to the following standards: (1) birth date after July 28th, 1976 (n=4053); (2)  
31  
32 139 incomplete information on relevant earthquake experience (n=1); and (3) missing  
33  
34 140 values in the surveys for the CES-D measurement scale (n=0). Missing data for  
35  
36 141 confounding variables (60 income variables) were imputed with their mean values  
37  
38 142 among these participants. Ultimately, a total of 5024 individuals were included in this  
39  
40 143 cross-sectional study. The participants in the Jidong Cohort are subjected to a physical  
41  
42 144 examination annually, which is paid for by the community. Therefore, the response  
43  
44 145 rate was almost 100%(5024/5025).

45  
46  
47  
48 146 This study was performed according to guidelines from the Declaration of Helsinki  
49  
50 147 and approved by the Ethics Committee of Jidong Oilfield Staff Hospital. All  
51  
52 148 participants provided written informed consent.  
53  
54

55  
56 149

## 57 58 150 **Assessment of earthquake experience**

59  
60

1  
2  
3 151 The exposure variable of interest was experience with the earthquake. Earthquake  
4  
5 152 experience and related bereavement were collected through a structured questionnaire.  
6  
7  
8 153 These factors were obtained using the following questions: “Were you in the  
9  
10 154 Tangshan earthquake area in 1976?” and “Did you lose any relatives in the  
11  
12 155 earthquake?”<sup>23</sup> According to the answers to these questions, subjects were classified  
13  
14 156 into 3 groups: no earthquake experience, earthquake experience without bereavement,  
15  
16  
17 157 and earthquake experience with bereavement.  
18  
19  
20  
21  
22

### 23 159 **Assessment of current depression**

24 160 Depressive symptoms were assessed using the CES-D, which was initially developed  
25  
26 161 by the United States National Institute of Mental Health in 1977<sup>29</sup>. The Chinese  
27  
28 162 version of the CES-D was translated from the international standard version of the  
29  
30 163 CES-D questionnaire in 1985 by two psychiatrists and was specifically designed to  
31  
32 164 screen for depression<sup>30</sup>. The CES-D questionnaire surveys the frequency of common  
33  
34 165 depressive symptoms over the past week. Each item in the depression assessment  
35  
36 166 section of the questionnaire is scored from 0 (rarely or none of the time, less than one  
37  
38 167 day) to 3 (all of the time, 5–7 days). The four positive statement items (item 4, I felt  
39  
40 168 that I was just as good as other people; item 8, I felt hopeful about the future; item 12,  
41  
42 169 I was happy; item 16, I enjoyed life) are reverse coded to calculate the total score,  
43  
44  
45 170 which ranges from 0 to 60. A cut-off value of  $\geq 16$  has been widely used to define  
46  
47 171 clinically meaningful depressive symptoms<sup>31-33</sup>. All investigators attended a 3-day  
48  
49 172 training course and were licensed before conducting the CES-D interviews.  
50  
51  
52  
53  
54  
55

### 56 174 **Assessment of potential covariates**

57  
58 175 The selected covariates included factors known to be predictive of depression and/or  
59  
60

1  
2  
3 176 potentially correlated with earthquake exposure, including age at the time of the  
4  
5 177 earthquake, gender, education, income, smoking status, drinking status, residence in  
6  
7 178 Tangshan 1-2 years after the earthquake, hypertension, diabetes, and dyslipidaemia.  
8  
9  
10 179 Age at the time of the earthquake was defined as a continuous variable and then a  
11  
12 180 categorical variable (“≤6 years”, “6-18 years”, or “≥18 years”). The average monthly  
13  
14 181 income of each family member was categorized as “<¥3000”, “¥3000–5000” or  
15  
16 182 “>¥5,000”. Educational level was classified into three categories: “illiteracy or  
17  
18 183 primary school,” “middle school or high school,” and “university or above.”  
19  
20 184 Residence in Tangshan 1-2 years after the earthquake was classified as “yes” and “no”.  
21  
22 185 Smoking status was classified as “yes” (current smoker or quit<12 months ago) and  
23  
24 186 “no” (nonsmoker or quit>12 months ago).” Drinking status was divided into “yes”  
25  
26 187 (current drinking <1 standard servings/day, <2 standard servings/day, 2-4 standard  
27  
28 188 servings/day, ≥5 standard servings/day) and “no” (never drank, drank in the past).A  
29  
30 189 standard serving was defined as 15 g of ethanol. Systolic blood pressure (SBP) and  
31  
32 190 diastolic blood pressure (DBP) were measured twice using a mercury  
33  
34 191 sphygmomanometer with the subject in a seated position. If the difference between  
35  
36 192 the two measurements exceeded 5 mm Hg, an additional reading was taken, and the  
37  
38 193 average of the three readings was used. Hypertension was defined as having a history  
39  
40 194 of hypertension, exhibiting an SBP ≥140 mm Hg or a DBP≥90 mm Hg, or using  
41  
42 195 antihypertensive medications. The definition of diabetes mellitus was a fasting  
43  
44 196 glucose level ≥7.0 mmol/l (126 mg/dl), current treatment with insulin/oral  
45  
46 197 hypoglycaemic agents or a history of diabetes mellitus. Dyslipidaemia was defined as  
47  
48 198 a history of hyperlipidaemia, a total blood cholesterol level ≥220 mg/dl, a triglyceride  
49  
50 199 level≥150 mg/dl, or use of anti-hyperlipidaemic medications. All measures in this  
51  
52 200 cross-sectional study reflected the current values as of data collection.  
53  
54  
55  
56  
57  
58  
59  
60

1  
2  
3     201    **Statistical analysis**  
4

5     202    We first compared the characteristics of individuals according to their earthquake and  
6  
7     203    bereavement experiences (no earthquake experience, earthquake experience without  
8  
9     204    bereavement, and earthquake experience with bereavement) using the chi-squared test  
10  
11    205    for categorical variables and one-way ANOVA or the Kruskal–Wallis test for  
12  
13    206    continuous variables.  
14

15  
16  
17    207    We used logistic regression to examine the association between earthquake  
18  
19    208    experience and current depression, with "no earthquake experience" as the reference  
20  
21    209    group. Four multivariate models were fitted as follows: Model 1 was the unadjusted  
22  
23    210    model. Model 2 was adjusted for age at the time of the earthquake and gender. Model  
24  
25    211    3 was further adjusted for smoking status, drinking status, education, income, and  
26  
27    212    residence in Tangshan 1-2 years after the earthquake. Model 4 was further adjusted  
28  
29    213    for hypertension, diabetes, and dyslipidaemia.  
30

31  
32  
33    214    We also used multiple logistic regression to examine the association stratified by  
34  
35    215    gender and age at the time of the earthquake. To evaluate whether the effect of the  
36  
37    216    earthquake on depression would be modified by gender and/or age at the time of the  
38  
39    217    earthquake, we tested the statistical significance of earthquake  $\times$  gender and  
40  
41    218    earthquake  $\times$  age at the time of the earthquake as interaction effects in a  
42  
43    219    multiple-adjustment logistic model by applying a post-estimation Wald test to obtain  
44  
45    220    an omnibus P-value for the interactions between earthquake categories and  
46  
47    221    depression.  
48

49  
50  
51    222    All statistical tests were 2-sided, and results with a P-value $<0.05$  were considered  
52  
53    223    statistically significant. The analyses were performed in SAS version 9.4 (SAS  
54  
55    224    Institute Inc., Cary, NC, USA).  
56

57  
58    225  
59  
60

## 226 **Patient and public involvement**

227 Patients and the public were not involved in the development of the research question  
228 or outcome measures, study design, recruitment, or conduct of the study. The results  
229 will be disseminated to study participants through annual information events.

230

## 231 **RESULTS**

### 232 **Characteristics of the study participants**

233 The characteristics of the participants according to earthquake and bereavement  
234 experiences are shown in Table 1. In total, 5024 participants were included in this  
235 study; the participants were 50.2% male and ranged in age from 37 to 82 years at the  
236 time of data collection. Among all participants, 543 (10.8%) individuals experienced  
237 the earthquake without bereavement, and 98 (2.0%) participants lost relatives. The  
238 individuals who experienced the earthquake with or without bereavement were  
239 younger and were more likely to have lived in Tangshan 1-2 years after the  
240 earthquake than those who had not experienced the earthquake(12.1±9.0,  
241 13.1±9.1,and 14.8±9.2 years, respectively, for age;86.7%, 79.4%, and 1%,  
242 respectively, for residence). No differences were found in gender, smoking status,  
243 drinking status, education, income, hypertension, diabetes or dyslipidaemia. A higher  
244 incidence of depression was observed in the bereaved and non-bereaved earthquake  
245 survivors(12.2% (39/543) and 7.2% (12/98), respectively) than in those without  
246 earthquake experience (4.9% (215/4383)).

247

### 248 **Association between earthquake experience and depression**

249 Odds ratios (ORs) and 95% confidence intervals (CIs) for the association between  
250 earthquake experience and depression are presented in Table 2. The risk of depression

1  
2  
3 251 in the bereaved subgroup was 2.82 times (OR, 2.82; 95% CI, 1.24-6.39) higher than  
4  
5 252 that in the group with no earthquake experience after adjusting for gender, age at the  
6  
7 253 time of the earthquake, smoking status, drinking status, education, income, residence  
8  
9 254 in Tangshan 1-2 years after the earthquake, hypertension, diabetes, and dyslipidaemia.  
10  
11  
12 255 However, no statistically significant association was found in the non-bereaved group.  
13  
14  
15 256

### 16 17 257 **Subgroup analysis by gender and age as of the earthquake**

18  
19 258 In the models stratified by gender, the female subjects in both the bereaved (OR, 3.51;  
20  
21 259 95% CI, 1.21-10.16) and non-bereaved (OR, 3.07; 95% CI, 1.44-6.56) subgroups had  
22  
23 260 an increased risk of depression. In contrast, no significant association was found  
24  
25 261 between earthquake experience and the risk of depression among male subjects in  
26  
27 262 either the bereaved (OR, 2.09; 95% CI, 0.58-7.61) or the non-bereaved (OR, 0.84; 95%  
28  
29 263 CI, 0.32-2.20) subgroup. In the models stratified by age at the time of the earthquake,  
30  
31 264 we found a statistically significant association in individuals over 18 years old  
32  
33 265 whether they had lost relatives in the earthquake (OR, 13.16; 95% CI, 3.08-56.3) or  
34  
35 266 not (OR, 3.39; 95% CI, 1.31-8.87). No statistically significant association was found  
36  
37 267 in survivors under 6 years old whether they had been bereaved (OR, 1.65; 95% CI,  
38  
39 268 0.42-6.49) or not (OR, 1.09; 95% CI, 0.36-3.27), and there was also no significant  
40  
41 269 association in survivors aged between 6 and 18 years whether they had lost relatives  
42  
43 270 (OR, 1.11; 95% CI, 0.21-5.99) or not (OR, 1.30; 95% CI, 0.47-3.61). In addition, we  
44  
45 271 found a statistically significant interaction between gender and depression ( $P$  for  
46  
47 272 interaction= 0.02) but no significant interaction between age at the time of the  
48  
49 273 earthquake and depression ( $P$  for interaction= 0.51) (Figure 1).  
50  
51  
52  
53  
54  
55

56 274

### 57 58 275 **DISCUSSION**

1  
2  
3 276 In this community-based study, we observed that, even after 37 years, earthquake  
4  
5 277 survivors had a higher risk of depression than those who had not experienced the  
6  
7  
8 278 earthquake. In addition, long-term effects of the earthquake on depression were found  
9  
10 279 among bereaved survivors, women and individuals over 18 years old. This study is  
11  
12 280 the first to investigate the association between earthquake experience and depression  
13  
14  
15 281 37 years after an earthquake.

16  
17 282 Evidence shows that traumatic experiences in childhood and adolescence may have a  
18  
19 283 determining effect on brain structural development, sympathetic nervous system  
20  
21 284 responsivity, and the hypothalamic–pituitary–adrenal axis, especially in younger  
22  
23  
24 285 children (preschool) and school-age children (late childhood and early adolescence),  
25  
26 286 resulting in a large stress response and some psychological problems<sup>18</sup>. Therefore, we  
27  
28 287 classified the participants into age categories of 0-6, 6-18 and older than 18 years to  
29  
30 288 investigate the long-term impact of disaster on mental health during different stages  
31  
32  
33 289 of life. However, statistically significant associations were found only in individuals  
34  
35 290 over 18 years of age. One explanation is that different ages have different needs for  
36  
37 291 social networks. Social networking is associated with the onset of depression<sup>34</sup>.  
38  
39 292 Children's and adolescents' social needs are met by parental care and family<sup>35</sup>. Adults,  
40  
41 293 in contrast, need support from social interaction in the neighbourhood, the  
42  
43 294 communities, and the work place in addition to family support<sup>36</sup>. The advent of the  
44  
45 295 earthquake destroyed the previously stable social networks and economic foundation  
46  
47 296 of the community. Social-network destruction may lead to some mental health  
48  
49 297 disorders. Additionally, survivors under 18 years old recover from disaster more  
50  
51 298 easily than older survivors do. Insensitivity to the nature and meaning of disaster  
52  
53  
54 299 trauma<sup>37</sup> and access to mental health intervention in the early postdisaster stages<sup>38</sup> may  
55  
56  
57  
58  
59  
60



1  
2  
3 300 contribute to recovery from psychological problems among child and adolescent  
4  
5 301 survivors.  
6  
7 302 With regard to gender, we found a significant association between earthquake  
8  
9 303 experience and depression in females but not in males. Similar results have been  
10  
11 304 found in several previous studies of disaster, indicating that women may be at a  
12  
13 305 higher risk of depression than men<sup>13 19</sup>. One explanation of this gender difference is  
14  
15 306 that men tend to externalize stress, while women tend to internalize it<sup>39</sup>. Thus, of the  
16  
17 307 two genders, women have higher rates of anxiety and depression (internalizing  
18  
19 308 disorders), and men have higher rates of substance abuse (externalizing disorders)<sup>40</sup>.  
20  
21 309 Additionally, difference may be related to the culturally taught goals and roles of men  
22  
23 310 and women in society and the family. Men are required to have innate masculinity  
24  
25 311 and strength, while women are required to show empathy and tender-mindedness<sup>41 42</sup>.  
26  
27 312 Consequently, in the face of disasters, men are more stress-resistant than women and  
28  
29 313 recover more quickly. Women are more likely than men to be sentimental than men<sup>43</sup>  
30  
31 314 <sup>44</sup>. Once women fall into deep emotional pain, it is difficult for them to extricate  
32  
33 315 themselves<sup>45</sup>. We also found that, in female, the risk of depression was 3 times higher  
34  
35 316 in the group with earthquake experience group than in the group without. One  
36  
37 317 interpretation of this finding is that there are some components of earthquake-related  
38  
39 318 aftermath that weaken women's psychological defence mechanisms. Evidence show  
40  
41 319 that women are more likely than men to carry out rumination<sup>46</sup>, which is characterized  
42  
43 320 by continuous and repetitive thinking about painful memories<sup>47</sup>. When fear memories  
44  
45 321 of earthquake-related morbidity, mortality, and destruction constantly resurface,  
46  
47 322 women who have experienced earthquake face long-lasting emotional pain that can  
48  
49 323 lead to depression.  
50  
51  
52  
53  
54  
55  
56  
57  
58  
59  
60

1  
2  
3 324 Consistent with our findings, a longitudinal study on the Alexander Kielland oil  
4  
5 325 platform collapse shows that survivors have a higher risk of depression than  
6  
7 326 non-exposed individuals 27 years after the disaster<sup>15</sup>. Similar results are observed in  
8  
9 327 another longitudinal study with 10 years of follow-up, which indicates that survivors  
10  
11 328 of the Piper Alpha oil platform disaster show a long-lasting increase in mental health  
12  
13 329 problems compared with non-exposed individuals<sup>16</sup>. In contrast, two studies indicate  
14  
15 330 that disaster has little long-term effect on depression<sup>13 14</sup>. The inconsistency of the  
16  
17 331 results may be explained by the severity of the disaster. The Tangshan earthquake  
18  
19 332 caused more damage than the Buffalo Creek dam collapse or the Australian bushfire  
20  
21 333 disaster. The earthquake reduced Tangshan to ruins in a few minutes, with  
22  
23 334 approximately 85% of the buildings collapsed and at least 400,000 casualties<sup>20 48</sup>. The  
24  
25 335 earthquake afflicted the survivors with not only the loss of their homes but also, more  
26  
27 336 importantly, the tension and fear brought by the disaster itself, the loss of loved ones,  
28  
29 337 the complete destruction of social networks and a sense of despair<sup>49 50</sup>. During the  
30  
31 338 long-term urban reconstruction process, all these effects of the disaster might lead to  
32  
33 339 long-term adverse psychological effects on the survivors. In addition, the Tangshan  
34  
35 340 earthquake broke out at the end of the decade of the Cultural Revolution. The  
36  
37 341 consequences of the Cultural Revolution, which include a fragile economic  
38  
39 342 foundation, low economic compensation, lack of societal acknowledgement, and  
40  
41 343 destruction of the health care service network, may have delayed recovery.  
42  
43 344 The long-term effect of disaster on depression seems to depend on traumatic  
44  
45 345 experience. In our study, a statistically significant association between earthquake  
46  
47 346 experience and depression was observed in bereaved survivors but not in  
48  
49 347 non-bereaved survivors 37 years after the earthquake. This finding was consistent  
50  
51 348 with a longitudinal study carried out in Italy showing that exposure to loss and  
52  
53  
54  
55  
56  
57  
58  
59  
60

1  
2  
3 349 damage during an earthquake confers an additional risk of negative psychological  
4  
5 350 consequences above and beyond living in the earthquake zone<sup>10</sup>. Similarly, a  
6  
7 351 longitudinal study 14 years after MS Estonia Disaster indicated that non-bereaved  
8  
9 352 survivors recovered from their posttraumatic stress reactions, while little change was  
10  
11 353 found over that period in the reaction of the bereaved<sup>12</sup>. Traumatic bereavement may  
12  
13 354 be associated with increased severity of long-term posttraumatic stress reactions after  
14  
15 355 disasters<sup>51</sup>, which is considered to be involved in the onset of depression<sup>4</sup>.  
16  
17 356 Several plausible explanations may link earthquake exposure to the prevalence of  
18  
19 357 depressive symptoms. Earthquakes can cause tremendous, immediate damage to the  
20  
21 358 environment and even lead to adverse life events such as the death of a family  
22  
23 359 member and related events, thus exerting negative effects on individuals' emotions  
24  
25 360 and resulting in posttraumatic stress disorder (PTSD) after the disaster<sup>4 12</sup>. PTSD, as a  
26  
27 361 frequent comorbidity of depression<sup>52 53</sup>, may persist for decades following disaster<sup>54-56</sup>.  
28  
29 362 These findings suggest that traumatic bereavement might be a common mediating  
30  
31 363 mechanism of both depression and PTSD. The pain of loss in survivors may have  
32  
33 364 neurobiological effects on several brain areas (the frontolimbic and striatal areas)<sup>51 57</sup>.  
34  
35 365 These areas and the functional connectivity within the fronto-striato-thalamic and  
36  
37 366 default-mode networks have been found to be correlated with the progression of  
38  
39 367 mental health problems and may play important roles in adaptation to trauma<sup>4 58</sup>. The  
40  
41 368 trauma caused by disasters has a variety of mechanisms. Whether PTSD symptoms  
42  
43 369 further transform into depression or other mental illnesses in the long term will  
44  
45 370 require further exploration.  
46  
47 371 Gender, age at the time of the earthquake, education, income, smoking, drinking,  
48  
49 372 living in the affected area after a disaster, hypertension, diabetes and dyslipidaemia  
50  
51 373 were controlled in the multiple variable analysis. To avoid overfitting, we used four  
52  
53  
54  
55  
56  
57  
58  
59  
60

1  
2  
3 374 models to adjust confounding variables step by step. The resulting ORs reflected  
4  
5 375 minor changes in the 4 models, suggesting that earthquake experience may be an  
6  
7 376 independent risk factor for the occurrence of depression.  
8  
9  
10 377 Our study has a few limitations. First, substantial time has passed since the earthquake  
11  
12 378 occurred, and we were unable to control for every event or factor. For example, we  
13  
14 379 did not consider other traumatic events, such as traffic accidents, adverse childhood  
15  
16 380 experiences, other bereavement or current psychological stressors, which could have  
17  
18 381 confounded the observed associations. Additionally, the sample was not  
19  
20 382 representative of all survivors of the Tangshan earthquake. We did not include  
21  
22 383 survivors who had died in the past 37 years. Premature death may be related to  
23  
24 384 depression and disease. Meanwhile, in our sample, nearly 20% of the survivors did  
25  
26 385 not live in the earthquake zone 1-2 years after the earthquake. These people left the  
27  
28 386 painful environment and may have worked or attended school elsewhere for several  
29  
30 387 years, which may have largely relieved psychological stress and alleviated the  
31  
32 388 symptoms of depression. Therefore, the potential impacts of the earthquake on  
33  
34 389 depression may have been underestimated. Third, whether the subjects were taking  
35  
36 390 antidepressants was unknown. Fourth, the cross-sectional design of this study  
37  
38 391 precludes causal inferences. Finally, depression was assessed only once during the  
39  
40 392 study; therefore, we could not exclude the possibility of reverse causality.  
41  
42 393 The results of our study are very relevant to future research on depression among  
43  
44 394 disaster survivors. For instance, survivors of earthquakes in Japan, Haiti, and China  
45  
46 395 were all affected by high rates of depression in the short term<sup>59-62</sup>. Although the  
47  
48 396 timing and severity of the disasters, the ethnicity of the affected population, and the  
49  
50 397 living environment of the survivors are different, the stressors caused by disasters are  
51  
52 398 similar. Strengthening community social cohesion can facilitate recovery from  
53  
54  
55  
56  
57  
58  
59  
60

1  
2  
3 399 disaster trauma<sup>63 64</sup>. Clinicians and policymakers in public health should direct  
4  
5 400 additional early social support towards high-risk survivors of disasters, a measure that  
6  
7 401 may reduce the incidence of mental health problems, including depression, in disaster  
8  
9 402 zones<sup>65</sup>, even long after the disaster has passed.

10  
11  
12 403

13  
14 404 **CONCLUSIONS**

15  
16  
17 405 Thirty-seven years after the disasters, earthquake experience was associated with  
18  
19 406 depression among bereaved survivors, women and individuals over 18 years old at the  
20  
21 407 time. Our study provides evidence supporting the hypothesis that the effect of an  
22  
23 408 earthquake on depression persists for at least 37 years.  
24  
25  
26  
27  
28  
29  
30  
31  
32  
33  
34  
35  
36  
37  
38  
39  
40  
41  
42  
43  
44  
45  
46  
47  
48  
49  
50  
51  
52  
53  
54  
55  
56  
57  
58  
59  
60

1  
2  
3 **Acknowledgements** We thank all the participants, patient advisers and members of  
4  
5 the survey team in the Jidong community. We also appreciate the help and support we  
6  
7 received from the staff of RuikeDonghua Co., Ltd. During the review period, Yong  
8  
9 Zhou transferred to a different employer; his address was changed accordingly. We  
10  
11 guarantee that all authors have approved the changes in the author list.  
12  
13

14 **Contributors** All authors were involved from the beginning in all phases of the study.  
15  
16 XG, YZ and HPH designed the study. XG and YL analysed the data and prepared the  
17  
18 manuscript. JCY, QHC and BG critiqued the manuscript for important intellectual  
19  
20 content. XG and YCG conducted the statistical analysis. All authors have read and  
21  
22 approved the final version of this manuscript.  
23  
24

25 **Funding** This work was supported by the National Natural Science Foundation (No.  
26  
27 81473057, No.81202279), the National Social Science Fund (No.17BGL184) and the  
28  
29 Non-profit Central Research Institute Fund of Chinese Academy of Medical Sciences  
30  
31 (No.2017PT63009).  
32  
33

34 **Competing interests** None declared.  
35  
36

37 **Ethics approval** The research was approved by the Ethics Committee of Jidong  
38  
39 Oilfield Staff Hospital.  
40  
41

42 **Data sharing statement** All data used or analysed in the current study are available  
43  
44 from the corresponding author upon reasonable request.  
45  
46  
47  
48  
49  
50  
51  
52  
53  
54  
55  
56  
57  
58  
59  
60

**Table 1 Population characteristics according to earthquake experience**

| <b>Characteristics</b>                          | <b>Overall</b> | <b>No experience<br/>(n=4383)</b> | <b>Experience without<br/>bereavement<br/>(n=543)</b> | <b>Experience with<br/>Bereavement<br/>(n=98)</b> | <b><i>P-value</i></b> |
|-------------------------------------------------|----------------|-----------------------------------|-------------------------------------------------------|---------------------------------------------------|-----------------------|
| Men, n (%)                                      | 2524(50.2)     | 2210(50.4)                        | 276(50.8)                                             | 38(38.8)                                          | 0.071                 |
| Age at the time of the<br>earthquake, mean (SD) | 14.6±9.2       | 14.8±9.2                          | 13.1±9.1                                              | 12.1±9.0                                          | <0.001                |
| ≤6                                              | 1063(21.2)     | 880(20.08)                        | 146(26.89)                                            | 37(37.76)                                         | <0.001                |
| 6-18                                            | 2053(40.9)     | 1796(40.98)                       | 226(41.62)                                            | 31(31.63)                                         |                       |
| ≥18                                             | 1908(38.0)     | 1707(38.95)                       | 171(31.49)                                            | 30(30.61)                                         |                       |
| Smoking, n (%)                                  | 1286(25.6)     | 1136(25.9)                        | 132(24.3)                                             | 18(18.4)                                          | 0.182                 |
| Drinking, n (%)                                 | 1578(31.4)     | 1364(31.1)                        | 186(34.3)                                             | 28(28.6)                                          | 0.276                 |
| Education, n (%)                                |                |                                   |                                                       |                                                   | 0.689                 |
| Illiteracy/primary                              | 318(6.3)       | 279(6.4)                          | 31(5.7)                                               | 8(8.2)                                            |                       |

|                                                             |            |            |           |          |        |
|-------------------------------------------------------------|------------|------------|-----------|----------|--------|
| Middle school/high school                                   | 2704(53.8) | 2370(54.1) | 282(51.9) | 52(53.1) |        |
| University or above                                         | 2002(39.9) | 1734(39.6) | 230(42.4) | 38(38.8) |        |
| Income, n (%)                                               |            |            |           |          | 0.127  |
| ≤3000                                                       | 2415(48.1) | 2087(47.6) | 270(49.7) | 58(59.2) |        |
| 3001-5000                                                   | 2278(45.3) | 2002(45.7) | 243(44.8) | 33(33.7) |        |
| >5000                                                       | 331(6.6)   | 294(6.7)   | 30(5.5)   | 7(7.1)   |        |
| Residence in Tangshan 1-2 years after the earthquake, n (%) | 561(11.2)  | 45(1.0)    | 431(79.4) | 85(86.7) | <0.001 |
| Hypertension, n (%)                                         | 2158(43.0) | 1872(42.7) | 237(43.7) | 45(45.9) | 0.463  |
| Diabetes, n (%)                                             | 550(11.0)  | 497(11.3)  | 43(7.9)   | 10(10.2) | 0.054  |
| Dyslipidaemia, n (%)                                        | 3102(61.7) | 2696(61.5) | 343(63.2) | 63(64.3) | 0.659  |
| Depression, n (%)                                           | 266(5.3)   | 215(4.9)   | 39(7.2)   | 12(12.2) | 0.001  |



**Table 2. Odds ratios for the association between earthquake experience and depression**

|                | No earthquake experience<br>(n=4383, 87.2%) | Experience without bereavement<br>(n=543, 10.8%) | Experience with bereavement<br>(n=98, 2.0%) |
|----------------|---------------------------------------------|--------------------------------------------------|---------------------------------------------|
| <b>Model 1</b> | 1                                           | 1.42(0.99-2.20)                                  | 2.46(1.32-4.59)                             |
| <b>Model 2</b> | 1                                           | 1.43(1.01-2.04)                                  | 2.50(1.34-4.68)                             |
| <b>Model 3</b> | 1                                           | 1.61 (0.88-2.95)                                 | 2.88 (1.26-6.57)                            |
| <b>Model 4</b> | 1                                           | 1.69(0.93-3.08)                                  | 2.82(1.24-6.39)                             |

Model 1 refers to the unadjusted model.

Model 2 refers to the model adjusted for gender and age at the time of the earthquake.

Model 3 refers to the model adjusted for gender, age at the time of the earthquake, smoking status, drinking status, education, income, and residence in Tangshan 1-2 years after the earthquake.

Model 4 refers to the model adjusted for gender, age at the time of the earthquake, smoking status, drinking status, education, income, residence in Tangshan 1-2 years after the earthquake, hypertension, diabetes, and dyslipidaemia.

1  
2  
3 409 **Figure 1** Odds ratio of depression given earthquake experience, stratified by gender  
4  
5  
6 410 and age at the time of the earthquake.  
7  
8 411 Groups stratified by gender, adjusted for age at the time of the earthquake, smoking  
9  
10 412 status, drinking status, education, income, residence in Tangshan 1-2 years after the  
11  
12 413 earthquake, hypertension, diabetes, and dyslipidaemia. Groups stratified by age at the  
13  
14 414 time of the earthquake, adjusted for gender, smoking status, drinking status, education,  
15  
16 415 income, residence in Tangshan 1-2 years after the earthquake, hypertension, diabetes,  
17  
18 416 and dyslipidaemia.  
19  
20  
21 417  
22  
23  
24 418  
25  
26  
27  
28  
29  
30  
31  
32  
33  
34  
35  
36  
37  
38  
39  
40  
41  
42  
43  
44  
45  
46  
47  
48  
49  
50  
51  
52  
53  
54  
55  
56  
57  
58  
59  
60

420 **REFERENCES**

- 421 1. WHO W, Mathers C, Fat DM, et al. The global burden of disease: 2004 update. *Irish*  
422 *Medical Journal* 2008;106(1):4.
- 423 2. Krishnan V, Nestler EJ. The molecular neurobiology of depression. *Nature*  
424 2008;455(7215):894-902. doi: 10.1038/nature07455 [published Online First:  
425 2008/10/17]
- 426 3. Guo J, He H, Fu M, et al. Suicidality associated with PTSD, depression, and  
427 disaster recovery status among adult survivors 8 years after the 2008  
428 Wenchuan earthquake in China. *Psychiatry research* 2017;253:383-90. doi:  
429 10.1016/j.psychres.2017.04.022 [published Online First: 2017/04/25]
- 430 4. Yang L, Zhao Y, Wang Y, et al. The Effects of Psychological Stress on Depression.  
431 *Current neuropharmacology* 2015;13(4):494-504. [published Online First:  
432 2015/09/29]
- 433 5. Madden JS. Alcohol and depression. *British journal of hospital medicine*  
434 1993;50(5):261-4. [published Online First: 1993/09/01]
- 435 6. Gu L, Xie J, Long J, et al. Epidemiology of major depressive disorder in mainland  
436 china: a systematic review. *PloS one* 2013;8(6):e65356. doi:  
437 10.1371/journal.pone.0065356 [published Online First: 2013/06/21]
- 438 7. Kessler RC, Berglund P, Demler O, et al. The epidemiology of major depressive  
439 disorder: results from the National Comorbidity Survey Replication (NCS-R).  
440 *Jama* 2003;289(23):3095-105. doi: 10.1001/jama.289.23.3095 [published  
441 Online First: 2003/06/19]
- 442 8. van Griensven F, Chakkraband ML, Thienkrua W, et al. Mental health problems  
443 among adults in tsunami-affected areas in southern Thailand. *Jama*  
444 2006;296(5):537-48. doi: 10.1001/jama.296.5.537 [published Online First:  
445 2006/08/03]
- 446 9. Fergusson DM, Horwood LJ, Boden JM, et al. Impact of a major disaster on the  
447 mental health of a well-studied cohort. *JAMA psychiatry* 2014;71(9):1025-31.  
448 doi: 10.1001/jamapsychiatry.2014.652 [published Online First: 2014/07/17]
- 449 10. Bland SH, O'Leary ES, Farinano E, et al. Long-term psychological effects of  
450 natural disasters. *Psychosomatic medicine* 1996;58(1):18-24. [published  
451 Online First: 1996/01/01]

- 1  
2  
3  
4 452 11. Bryant RA, Creamer M, O'Donnell M, et al. Acute and Chronic Posttraumatic  
5 453 Stress Symptoms in the Emergence of Posttraumatic Stress Disorder: A  
6 454 Network Analysis. *JAMA psychiatry* 2017;74(2):135-42. doi:  
7 455 10.1001/jamapsychiatry.2016.3470 [published Online First: 2016/12/22]  
8  
9 456 12. Arnberg FK, Eriksson NG, Hultman CM, et al. Traumatic bereavement, acute  
10 457 dissociation, and posttraumatic stress: 14 years after the MS Estonia disaster.  
11 458 *Journal of traumatic stress* 2011;24(2):183-90. doi: 10.1002/jts.20629  
12 459 [published Online First: 2011/03/29]  
13  
14 460 13. Green BL, Grace MC, Vary MG, et al. Children of disaster in the second decade:  
15 461 a 17-year follow-up of Buffalo Creek survivors. *Journal of the American*  
16 462 *Academy of Child and Adolescent Psychiatry* 1994;33(1):71-9. doi:  
17 463 10.1097/00004583-199401000-00011 [published Online First: 1994/01/01]  
18 464 14. McFarlane AC, Van Hooff M. Impact of childhood exposure to a natural disaster  
19 465 on adult mental health: 20-year longitudinal follow-up study. *The British*  
20 466 *journal of psychiatry : the journal of mental science* 2009;195(2):142-8. doi:  
21 467 10.1192/bjp.bp.108.054270 [published Online First: 2009/08/04]  
22 468 15. Boe HJ, Holgersen KH, Hølen A. Mental health outcomes and predictors of  
23 469 chronic disorders after the North Sea oil rig disaster: 27-year longitudinal  
24 470 follow-up study. *The Journal of nervous and mental disease*  
25 471 2011;199(1):49-54. doi: 10.1097/NMD.0b013e31820446a8 [published Online  
26 472 First: 2011/01/06]  
27 473 16. Hull AM, Alexander DA, Klein S. Survivors of the Piper Alpha oil platform  
28 474 disaster: long-term follow-up study. *The British journal of psychiatry : the*  
29 475 *journal of mental science* 2002;181:433-8. [published Online First:  
30 476 2002/11/02]  
31 477 17. Norris F PJ, Kaniasty K. Individual and Community Responses to Trauma and  
32 478 Disaster: Individual and community reactions to the Kentucky floods: findings  
33 479 from a longitudinal study of older adults. *Cambridge University Press* 1994  
34 480 18. Shaw JA. Children, adolescents and trauma. *The Psychiatric quarterly*  
35 481 2000;71(3):227-43. [published Online First: 2000/08/10]  
36 482 19. Guo J, He H, Qu Z, et al. Post-traumatic stress disorder and depression among  
37 483 adult survivors 8 years after the 2008 Wenchuan earthquake in China. *Journal*  
38  
39  
40  
41  
42  
43  
44  
45  
46  
47  
48  
49  
50  
51  
52  
53  
54  
55  
56  
57  
58  
59  
60

- 1  
2  
3  
4 484 *of affective disorders* 2017;210:27-34. doi: 10.1016/j.jad.2016.12.009  
5 485 [published Online First: 2016/12/23]  
6  
7 486 20. Sheng ZY. Medical support in the Tangshan earthquake: a review of the  
8  
9 487 management of mass casualties and certain major injuries. *The Journal of*  
10  
11 488 *trauma* 1987;27(10):1130-5. [published Online First: 1987/10/01]  
12  
13 489 21. An C, Zhang Y, Yu L, et al. Long-term impact of earthquake stress on fasting  
14  
15 490 glucose control and diabetes prevalence among Chinese adults of Tangshan.  
16  
17 491 *International journal of clinical and experimental medicine*  
18  
19 492 2014;7(11):4441-7. [published Online First: 2015/01/01]  
20  
21 493 22. Ji C, Li Y, Cui L, et al. Prenatal Earthquake Exposure and Midlife Uric Acid  
22  
23 494 Levels Among Chinese Adults. *Arthritis care & research* 2017;69(5):703-08.  
24  
25 495 doi: 10.1002/acr.22973 [published Online First: 2016/07/28]  
26  
27 496 23. Meng X, Brunet A, Turecki G, et al. Risk factor modifications and depression  
28  
29 497 incidence: a 4-year longitudinal Canadian cohort of the Montreal Catchment  
30  
31 498 Area Study. *BMJ open* 2017;7(6):e015156. doi:  
32  
33 499 10.1136/bmjopen-2016-015156 [published Online First: 2017/06/12]  
34  
35 500 24. Guo YC, Zhou Y, Gao X, et al. Association between Nonalcoholic Fatty Liver  
36  
37 501 Disease and Carotid Artery Disease in a Community-Based Chinese  
38  
39 502 Population: A Cross-Sectional Study. *Chinese medical journal*  
40  
41 503 2018;131(19):2269-76. doi: 10.4103/0366-6999.241797 [published Online  
42  
43 504 First: 2018/09/25]  
44  
45 505 25. Song Q, Liu X, Wang A, et al. Associations between non-traditional lipid  
46  
47 506 measures and risk for type 2 diabetes mellitus in a Chinese community  
48  
49 507 population: a cross-sectional study. *Lipids in health and disease* 2016;15:70.  
50  
51 508 doi: 10.1186/s12944-016-0239-y [published Online First: 2016/04/06]  
52  
53 509 26. Hao Z, Zhang Y, Li Y, et al. The Association between Ideal Cardiovascular  
54  
55 510 Health Metrics and Extracranial Carotid Artery Stenosis in a Northern Chinese  
56  
57 511 Population: A Cross-Sectional Study. *Scientific reports* 2016;6:31720. doi:  
58  
59 512 10.1038/srep31720 [published Online First: 2016/08/31]  
60  
513 27. Han X, Yang Y, Chen Y, et al. Association between insomnia and atrial  
514  
515 514 fibrillation in a Chinese population: A cross-sectional study. *Clinical*  
516  
517 515 *cardiology* 2017;40(9):765-69. doi: 10.1002/clc.22731 [published Online  
518  
519 516 First: 2017/06/01]

- 1  
2  
3  
4 517 28. Wang Y, Ge S, Yan Y, et al. China suboptimal health cohort study: rationale,  
5 518 design and baseline characteristics. *Journal of translational medicine*  
6 519 2016;14(1):291. doi: 10.1186/s12967-016-1046-y [published Online First:  
7 520 2016/10/16]
- 8  
9  
10 521 29. Radloff LS. The CES-D Scale. *Applied Psychological Measurement*  
11 522 1977;1(3):385-401.
- 12  
13  
14 523 30. Chien CP, Cheng TA. Depression in Taiwan: epidemiological survey utilizing  
15 524 CES-D. *Seishin shinkeigaku zasshi = Psychiatria et neurologia Japonica*  
16 525 1985;87(5):335-8. [published Online First: 1985/01/01]
- 17  
18  
19 526 31. Zhang Y, Ting RZ, Lam MH, et al. Measuring depression with CES-D in Chinese  
20 527 patients with type 2 diabetes: the validity and its comparison to PHQ-9. *BMC*  
21 528 *psychiatry* 2015;15:198. doi: 10.1186/s12888-015-0580-0 [published Online  
22 529 First: 2015/08/19]
- 23  
24  
25 530 32. Zhang J, Sun W, Kong Y, et al. Reliability and validity of the Center for  
26 531 Epidemiological Studies Depression Scale in 2 special adult samples from  
27 532 rural China. *Comprehensive psychiatry* 2012;53(8):1243-51. doi:  
28 533 10.1016/j.comppsy.2012.03.015 [published Online First: 2012/04/24]
- 29  
30  
31 534 33. Wang F, Liu J, Liu L, et al. The status and correlates of depression and anxiety  
32 535 among breast-cancer survivors in Eastern China: a population-based,  
33 536 cross-sectional case-control study. *BMC public health* 2014;14:326. doi:  
34 537 10.1186/1471-2458-14-326 [published Online First: 2014/04/09]
- 35  
36  
37 538 34. Rosenquist JN, Fowler JH, Christakis NA. Social network determinants of  
38 539 depression. *Molecular psychiatry* 2011;16(3):273-81. doi:  
39 540 10.1038/mp.2010.13 [published Online First: 2010/03/17]
- 40  
41  
42 541 35. McFarlane AC. Posttraumatic phenomena in a longitudinal study of children  
43 542 following a natural disaster. *Journal of the American Academy of Child and*  
44 543 *Adolescent Psychiatry* 1987;26(5):764-9. doi:  
45 544 10.1097/00004583-198709000-00025 [published Online First: 1987/09/01]
- 46  
47  
48 545 36. Bland SH, O'Leary ES, Farinero E, et al. Social network disturbances and  
49 546 psychological distress following earthquake evacuation. *The Journal of*  
50 547 *nervous and mental disease* 1997;185(3):188-94. [published Online First:  
51 548 1997/03/01]
- 52  
53  
54  
55  
56  
57  
58  
59  
60

- 1  
2  
3  
4 549 37. Green BL, Korol M, Grace MC, et al. Children and disaster: age, gender, and  
5 550 parental effects on PTSD symptoms. *Journal of the American Academy of*  
6 551 *Child and Adolescent Psychiatry* 1991;30(6):945-51. doi:  
7 552 10.1097/00004583-199111000-00012 [published Online First: 1991/11/01]  
8  
9 553 38. Wang CW, Chan CL, Ho RT. Prevalence and trajectory of psychopathology  
10 554 among child and adolescent survivors of disasters: a systematic review of  
11 555 epidemiological studies across 1987-2011. *Social psychiatry and psychiatric*  
12 556 *epidemiology* 2013;48(11):1697-720. doi: 10.1007/s00127-013-0731-x  
13 557 [published Online First: 2013/07/05]  
14  
15 558 39. Ekpenyong CE, Daniel NE, Aribo EO. Associations between academic stressors,  
16 559 reaction to stress, coping strategies and musculoskeletal disorders among  
17 560 college students. *Ethiopian journal of health sciences* 2013;23(2):98-112.  
18 561 [published Online First: 2013/08/21]  
19  
20 562 40. Afifi M. Gender differences in mental health. *Singapore medical journal*  
21 563 2007;48(5):385-91. [published Online First: 2007/04/25]  
22  
23 564 41. Feingold A. Gender differences in personality: a meta-analysis. *Psychological*  
24 565 *bulletin* 1994;116(3):429-56. [published Online First: 1994/11/01]  
25  
26 566 42. Christov-Moore L, Simpson EA, Coude G, et al. Empathy: gender effects in brain  
27 567 and behavior. *Neuroscience and biobehavioral reviews* 2014;46 Pt 4:604-27.  
28 568 doi: 10.1016/j.neubiorev.2014.09.001 [published Online First: 2014/09/23]  
29  
30 569 43. Ranasinghe PD, Levy BR. Prevalence of and sex disparities in posttraumatic  
31 570 stress disorder in an internally displaced Sri Lankan population 6 months after  
32 571 the 2004 Tsunami. *Disaster medicine and public health preparedness*  
33 572 2007;1(1):34-41; discussion 41-3. doi: 10.1097/DMP.0b013e318068fbb7  
34 573 [published Online First: 2008/04/05]  
35  
36 574 44. Aksaray G, Kortan G, Erkaya H, et al. Gender differences in psychological effect  
37 575 of the August 1999 earthquake in Turkey. *Nordic journal of psychiatry*  
38 576 2006;60(5):387-91. doi: 10.1080/08039480600937553 [published Online  
39 577 First: 2006/10/20]  
40  
41 578 45. Sandanger I, Nygard JF, Sorensen T, et al. Is women's mental health more  
42 579 susceptible than men's to the influence of surrounding stress? *Social*  
43 580 *psychiatry and psychiatric epidemiology* 2004;39(3):177-84. doi:  
44 581 10.1007/s00127-004-0728-6 [published Online First: 2004/03/05]



- 1  
2  
3  
4 582 46. Nolen-Hoeksema S, Harrell ZA. Rumination, Depression, and Alcohol Use: Tests  
5 583 of Gender Differences. *Journal of Cognitive Psychotherapy*  
6 584 2002;16(4):391-403.
- 7  
8  
9 585 47. Watkins E, Moulds M. Distinct modes of ruminative self-focus: impact of abstract  
10 586 versus concrete rumination on problem solving in depression. *Emotion*  
11 587 (*Washington, DC*) 2005;5(3):319-28. doi: 10.1037/1528-3542.5.3.319  
12 588 [published Online First: 2005/09/29]
- 13  
14  
15 589 48. Liu H, Housner GW, Xie L, et al. The Great Tangshan Earthquake of 1976.  
16 590 *California Institute of Technology* 2002
- 17  
18  
19 591 49. Armenian HK, Morikawa M, Melkonian AK, et al. Loss as a determinant of  
20 592 PTSD in a cohort of adult survivors of the 1988 earthquake in Armenia:  
21 593 implications for policy. *Acta psychiatrica Scandinavica* 2000;102(1):58-64.  
22 594 [published Online First: 2000/07/13]
- 23  
24  
25 595 50. Carr VJ, Lewin TJ, Webster RA, et al. Psychosocial sequelae of the 1989  
26 596 Newcastle earthquake: II. Exposure and morbidity profiles during the first 2  
27 597 years post-disaster. *Psychological medicine* 1997;27(1):167-78. [published  
28 598 Online First: 1997/01/01]
- 29  
30  
31 599 51. Green BL, Lindy JD, Grace MC, et al. Chronic posttraumatic stress disorder and  
32 600 diagnostic comorbidity in a disaster sample. *The Journal of nervous and*  
33 601 *mental disease* 1992;180(12):760-6. [published Online First: 1992/12/01]
- 34  
35  
36 602 52. Breslau N, Davis GC, Peterson EL, et al. A second look at comorbidity in victims  
37 603 of trauma: the posttraumatic stress disorder-major depression connection.  
38 604 *Biological psychiatry* 2000;48(9):902-9. [published Online First: 2000/11/14]
- 39  
40  
41 605 53. Basoglu M, Kilic C, Salcioglu E, et al. Prevalence of posttraumatic stress disorder  
42 606 and comorbid depression in earthquake survivors in Turkey: an  
43 607 epidemiological study. *Journal of traumatic stress* 2004;17(2):133-41. doi:  
44 608 10.1023/B:JOTS.0000022619.31615.e8 [published Online First: 2004/05/15]
- 45  
46  
47 609 54. Marshall GN, Schell TL, Elliott MN, et al. Mental health of Cambodian refugees  
48 610 2 decades after resettlement in the United States. *Jama* 2005;294(5):571-9.  
49 611 doi: 10.1001/jama.294.5.571 [published Online First: 2005/08/04]
- 50  
51  
52 612 55. Goenjian AK, Khachadourian V, Armenian H, et al. Posttraumatic Stress Disorder  
53 613 23 Years After the 1988 Spitak Earthquake in Armenia. *Journal of traumatic*



- 1  
2  
3  
4 614 *stress* 2018;31(1):47-56. doi: 10.1002/jts.22260 [published Online First:  
5 615 2018/03/08]  
6  
7 616 56. Morgan L, Scourfield J, Williams D, et al. The Aberfan disaster: 33-year  
8  
9 617 follow-up of survivors. *The British journal of psychiatry : the journal of*  
10  
11 618 *mental science* 2003;182:532-6. [published Online First: 2003/06/05]  
12  
13 619 57. McFarlane AC. The prevalence and longitudinal course of PTSD. Implications for  
14  
15 620 the neurobiological models of PTSD. *Annals of the New York Academy of*  
16  
17 621 *Sciences* 1997;821:10-23. [published Online First: 1997/06/21]  
18  
19 622 58. Long J, Huang X, Liao Y, et al. Prediction of post-earthquake depressive and  
20  
21 623 anxiety symptoms: a longitudinal resting-state fMRI study. *Scientific reports*  
22  
23 624 2014;4:6423. doi: 10.1038/srep06423 [published Online First: 2014/09/23]  
24  
25 625 59. Guo J, Wu P, Tian D, et al. Post-traumatic stress disorder among adult survivors  
26  
27 626 of the Wenchuan earthquake in China: a repeated cross-sectional study. *J*  
28  
29 627 *Anxiety Disord* 2014;28(1):75-82. doi: 10.1016/j.janxdis.2013.12.001  
30  
31 628 [published Online First: 2014/01/07]  
32  
33 629 60. Ye Y, Fan F, Li L, et al. Trajectory and predictors of depressive symptoms among  
34  
35 630 adolescent survivors following the Wenchuan earthquake in China: a cohort  
36  
37 631 study. *Social psychiatry and psychiatric epidemiology* 2014;49(6):943-52. doi:  
38  
39 632 10.1007/s00127-014-0821-4 [published Online First: 2014/01/17]  
40  
41 633 61. Matsubara C, Murakami H, Imai K, et al. Prevalence and risk factors for  
42  
43 634 depressive reaction among resident survivors after the tsunami following the  
44  
45 635 Great East Japan Earthquake, March 11, 2011. *PloS one* 2014;9(10):e109240.  
46  
47 636 doi: 10.1371/journal.pone.0109240 [published Online First: 2014/10/04]  
48  
49 637 62. Cerda M, Paczkowski M, Galea S, et al. Psychopathology in the aftermath of the  
50  
51 638 Haiti earthquake: a population-based study of posttraumatic stress disorder  
52  
53 639 and major depression. *Depression and anxiety* 2013;30(5):413-24. doi:  
54  
55 640 10.1002/da.22007 [published Online First: 2012/11/06]  
56  
57 641 63. Hikichi H, Aida J, Tsuboya T, et al. Can Community Social Cohesion Prevent  
58  
59 642 Posttraumatic Stress Disorder in the Aftermath of a Disaster? A Natural  
60  
643 Experiment From the 2011 Tohoku Earthquake and Tsunami. *Am J Epidemiol*  
644  
645 2016;183(10):902-10. doi: 10.1093/aje/kwv335 [published Online First:  
2016/03/31]

- 1  
2  
3  
4 646 64. North CS, Pfefferbaum B. Mental health response to community disasters: a  
5 647 systematic review. *Jama* 2013;310(5):507.  
6  
7 648 65. Salcioglu E, Basoglu M. Psychological effects of earthquakes in children:  
8  
9 649 prospects for brief behavioral treatment. *World journal of pediatrics : WJP*  
10 650 2008;4(3):165-72. doi: 10.1007/s12519-008-0032-8 [published Online First:  
11  
12 651 2008/10/01]  
13  
14 652  
15  
16  
17  
18  
19  
20  
21  
22  
23  
24  
25  
26  
27  
28  
29  
30  
31  
32  
33  
34  
35  
36  
37  
38  
39  
40  
41  
42  
43  
44  
45  
46  
47  
48  
49  
50  
51  
52  
53  
54  
55  
56  
57  
58  
59  
60

For peer review only

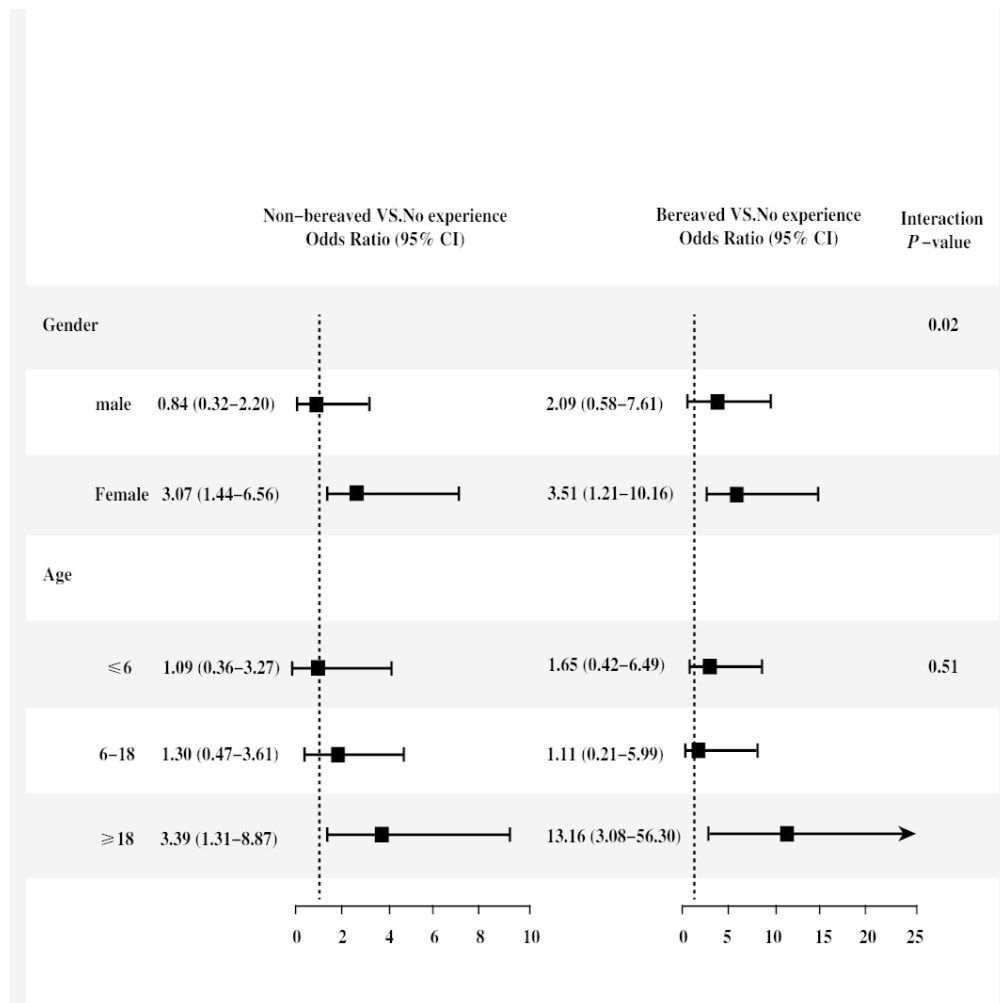

Figure 1 Odds ratio of depression given earthquake experience, stratified by gender and age at the time of the earthquake.

Groups stratified by gender, adjusted for age at the time of the earthquake, smoking status, drinking status, education, income, residence in Tangshan 1-2 years after the earthquake, hypertension, diabetes, and dyslipidaemia. Groups stratified by age at the time of the earthquake, adjusted for gender, smoking status, drinking status, education, income, residence in Tangshan 1-2 years after the earthquake, hypertension, diabetes, and dyslipidaemia.

90x90mm (300 x 300 DPI)

# BMJ Open

## The Association between Earthquake Experience and Depression 37 Years after the Tangshan Earthquake: A Cross-sectional Study

|                                 |                                                                                                                                                                                                                                                                                                                                                                                                                                                                                                                                                                                                                                                                                                                                                                                                                                                                                                                                                                                                                                                                                                                                                                                                                                                       |
|---------------------------------|-------------------------------------------------------------------------------------------------------------------------------------------------------------------------------------------------------------------------------------------------------------------------------------------------------------------------------------------------------------------------------------------------------------------------------------------------------------------------------------------------------------------------------------------------------------------------------------------------------------------------------------------------------------------------------------------------------------------------------------------------------------------------------------------------------------------------------------------------------------------------------------------------------------------------------------------------------------------------------------------------------------------------------------------------------------------------------------------------------------------------------------------------------------------------------------------------------------------------------------------------------|
| Journal:                        | <i>BMJ Open</i>                                                                                                                                                                                                                                                                                                                                                                                                                                                                                                                                                                                                                                                                                                                                                                                                                                                                                                                                                                                                                                                                                                                                                                                                                                       |
| Manuscript ID                   | bmjopen-2018-026110.R3                                                                                                                                                                                                                                                                                                                                                                                                                                                                                                                                                                                                                                                                                                                                                                                                                                                                                                                                                                                                                                                                                                                                                                                                                                |
| Article Type:                   | Research                                                                                                                                                                                                                                                                                                                                                                                                                                                                                                                                                                                                                                                                                                                                                                                                                                                                                                                                                                                                                                                                                                                                                                                                                                              |
| Date Submitted by the Author:   | 23-May-2019                                                                                                                                                                                                                                                                                                                                                                                                                                                                                                                                                                                                                                                                                                                                                                                                                                                                                                                                                                                                                                                                                                                                                                                                                                           |
| Complete List of Authors:       | Gao, Xing; Chinese Academy of Medical Sciences & Peking Union Medical College Institute of Medical Information<br>Leng, Yue; Global Brain Health Institute , Department of Psychiatry, University of California<br>Guo, Yuchen; Chinese Academy of Medical Sciences & Peking Union Medical College Institute of Medical Information<br>Yang, Jichun; Department of Physiology and Pathophysiology, School of Basic Medical Sciences Key Laboratory of Molecular Cardiovascular Science of the Ministry of Education Center for Non-coding RNA Medicine Peking University Health Science Center<br>Cui, Qinghua; Department of Biomedical Informatics, School of Basic Medical Sciences Key Laboratory of Molecular Cardiovascular Science of the Ministry of Education Center for Non-coding RNA Medicine Peking University Health Science Center<br>Geng, Bin ; Hypertension Center, Fuwai Hospital, Chinese Academy of Medical Sciences and Peking Union Medical College, State Key Laboratory of Cardiovascular Disease<br>Hu, Hongpu; Chinese Academy of Medical Sciences & Peking Union Medical College Institute of Medical Information<br>zhou, Yong; Sanbo Brain Institute, Sanbo Brain Hospital, Capital Medical University, Beijing, China. |
| <b>Primary Subject Heading</b>: | Epidemiology                                                                                                                                                                                                                                                                                                                                                                                                                                                                                                                                                                                                                                                                                                                                                                                                                                                                                                                                                                                                                                                                                                                                                                                                                                          |
| Secondary Subject Heading:      | Mental health, Public health, Health services research                                                                                                                                                                                                                                                                                                                                                                                                                                                                                                                                                                                                                                                                                                                                                                                                                                                                                                                                                                                                                                                                                                                                                                                                |
| Keywords:                       | Depression & mood disorders < PSYCHIATRY, Earthquake, Association, EPIDEMIOLOGY                                                                                                                                                                                                                                                                                                                                                                                                                                                                                                                                                                                                                                                                                                                                                                                                                                                                                                                                                                                                                                                                                                                                                                       |
|                                 |                                                                                                                                                                                                                                                                                                                                                                                                                                                                                                                                                                                                                                                                                                                                                                                                                                                                                                                                                                                                                                                                                                                                                                                                                                                       |

SCHOLARONE™  
Manuscripts

1  
2  
3 **1 The Association between Earthquake Experience and Depression 37 Years after**  
4 **the Tangshan Earthquake: A Cross-sectional Study**

5  
6  
7  
8 3 Xing Gao<sup>1</sup>, Yue Leng<sup>2</sup>, YuchenGuo<sup>1</sup>, JichunYang<sup>3</sup>, QinghuaCui<sup>3</sup>, Bin Geng<sup>4</sup>,  
9  
10 4 HongpuHu<sup>1</sup>, Yong Zhou<sup>5</sup>

11  
12  
13  
14  
15 **6 Corresponding Author**

16  
17 7 1 Hong-Pu Hu, MD, PhD, Professor of Institute of Medical Information, Chinese  
18  
19 8 Academy of Medical Sciences/Peking Union Medical College, Beijing

20  
21 9 Address: Yabao Road 3, CN-100020 Beijing, China

22  
23  
24 10 Tel./Fax: 86-10-52328610/86-10-52328870 Email: hu.hongpu@imicams.ac.cn

25  
26 11 2 Yong Zhou, MD, PhD, Associate Research Fellow, Sanbo Brain Institute, Sanbo  
27  
28 12 Brain Hospital, Capital Medical University, Beijing, China.

29  
30 13 Address: No 50Yikesong Street of Fragrant Hills, Haidian District, Beijing, 100093,  
31  
32 14 China.

33  
34  
35 15 Tel./Fax: 86-10-62859629 Email: yongzhou78214@163.com

36  
37  
38  
39  
40 **17 Authors' Affiliation**

41  
42 18 1 Institute of Medical Information, Chinese Academy of Medical Sciences/Peking  
43  
44 19 Union Medical College, Beijing, P.R. China

45  
46  
47 20 2 Global Brain Health Institute, Department of Psychiatry, University of California,  
48  
49 21 San Francisco, USA

50  
51 22 3 Department of Physiology and Pathophysiology, School of Basic Medical Sciences,  
52  
53 23 Key Laboratory of Molecular Cardiovascular Science of the Ministry of Education  
54  
55 24 Center for Non-coding RNA Medicine, Peking University Health Science Center,  
56  
57 25 Beijing, P.R. China  
58  
59  
60

1  
2  
3 26 4 Hypertension Center, Fuwai Hospital, Chinese Academy of Medical Sciences and  
4  
5 27 Peking Union Medical College, State Key Laboratory of Cardiovascular Disease,  
6  
7 28 Beijing, P.R. China  
8  
9

10 29 5 Sanbo Brain Institute, Sanbo Brain Hospital, Capital Medical University, Beijing,  
11  
12 30 P.R. China  
13  
14

15 31 **Joint first authorship**

16  
17 32 Yue Leng, M.Phil, PhD, Atlantic Fellow, Global Brain Health Institute, Department  
18  
19 33 of Psychiatry, University of California, San Francisco, USA  
20  
21

22 34

23  
24 35 **Word count: 3461**  
25  
26  
27  
28  
29  
30  
31  
32  
33  
34  
35  
36  
37  
38  
39  
40  
41  
42  
43  
44  
45  
46  
47  
48  
49  
50  
51  
52  
53  
54  
55  
56  
57  
58  
59  
60

1  
2  
3 36 **ABSTRACT**  
4

5 37 **Objective** To investigate the association between the Tangshan earthquake and  
6  
7  
8 38 depression after 37 years.  
9

10 39 **Design and setting** A cross-sectional study conducted in Tangshan from 2013 to  
11  
12 40 2014.  
13

14 41 **Participants** The sample included 5024 participants born before July 28, 1976, the  
15  
16 42 date of the Tangshan earthquake, with available data on their earthquake experiences  
17  
18 43 and depression 37 years post-earthquake.  
19  
20

21 44 **Outcomes and variables** The outcome was depression measured using the CES-D.  
22  
23 45 The independent variable was earthquake experience, which was classified into 3  
24  
25 46 groups: no earthquake experience, earthquake experience without bereavement, and  
26  
27 47 earthquake experience with bereavement. Multivariable logistic regression analysis  
28  
29 48 was used to evaluate the association between earthquake experience and depression  
30  
31 49 after adjusting for gender, age at the time of the earthquake, smoking status, drinking  
32  
33 50 status, education, income, residence in Tangshan 1-2 years post-earthquake,  
34  
35 51 hypertension, diabetes, and dyslipidaemia.  
36  
37  
38  
39

40 52 **Results** Of the 5024 participants, 641 experienced the Tangshan earthquake, and 98  
41  
42 53 experienced bereavement due to the earthquake. Thirty-seven years after the  
43  
44 54 earthquake, survivors who had lost relatives during the earthquake were nearly 3  
45  
46 55 times (OR 2.82, 95% CI 1.24-6.39) as likely to have depression as those who had not  
47  
48 56 experienced the earthquake, while those who had not lost relatives were 1.69 times as  
49  
50 57 likely (OR 1.69, 95% CI 0.93-3.08). Stratified analyses showed that earthquake was  
51  
52 58 significantly associated with depression in women with (OR 3.51, 95% CI 1.21-10.16)  
53  
54 59 or without bereavement (OR 3.07, 95% CI 1.44-6.56) but not in men; this association  
55  
56 60 was also significant in individuals over 18 years old at the time of the earthquake with  
57  
58  
59  
60

1  
2  
3 61 (OR 13.16, 95% CI 3.08-56.3) or without bereavement (OR 3.39, 95% CI 1.31-8.87)  
4  
5 62 but not in individuals less than 18 years old.  
6  
7

8 63 **Conclusions** Thirty-seven years after the Tangshan earthquake, earthquake  
9  
10 64 experience was associated with depression among bereaved survivors, women and  
11  
12 65 individuals over 18 years old at the time.  
13  
14

15 66

16  
17 67 **Word count: 299**  
18  
19  
20  
21  
22  
23  
24  
25  
26  
27  
28  
29  
30  
31  
32  
33  
34  
35  
36  
37  
38  
39  
40  
41  
42  
43  
44  
45  
46  
47  
48  
49  
50  
51  
52  
53  
54  
55  
56  
57  
58  
59  
60

For peer review only



1  
2  
3 **68 Strengths and limitations of this study**  
4

5 ● 69 The study investigated the long-term risk of depression 37 years after a major  
6  
7  
8 70 earthquake.

9  
10 ● 71 Participants were stratified by gender and age at the time of the earthquake.

11  
12 ● 72 We were unable to control for every event or factor, such as adverse childhood  
13  
14  
15 73 experiences, other bereavement or current psychological stressors.

16  
17 ● 74 Only participants who were still alive 37 years after the earthquake were able to  
18  
19  
20 75 participate in the study.  
21  
22  
23  
24  
25  
26  
27  
28  
29  
30  
31  
32  
33  
34  
35  
36  
37  
38  
39  
40  
41  
42  
43  
44  
45  
46  
47  
48  
49  
50  
51  
52  
53  
54  
55  
56  
57  
58  
59  
60

## 76 INTRODUCTION

77 Depression is predicted to be a major reason for disability around the world by 2030,  
78 according to the World Health Organization<sup>1</sup>. In addition, the chronic and debilitating  
79 nature of depression complicates the prognosis of chronic diseases, aggravates various  
80 diseases and may lead to suicide<sup>2-4</sup>. Evidence shows that depression is related to  
81 demographic characteristics, living habits, education, income, and health status<sup>5-7</sup>.

82 Participants exposed to disasters at an early life stage are at an increased risk of  
83 depression in the short term (1-4 years), independent of age, gender, income,  
84 education and other confounders<sup>8-10</sup>. Additionally, studies report that some survivors  
85 have psychological problems in the immediate aftermath of disaster trauma; most of  
86 these reactions abate over time, and only a minority of survivors develop a  
87 long-standing disorder<sup>11 12</sup>. Therefore, long-term evidence is essential to evaluate the  
88 effects of disaster on depression.

89 Findings regarding the long-term impact of disasters on mental health have been  
90 mixed. Several studies have reported no significant differences<sup>13 14</sup>, but others have  
91 revealed more psychological problems in exposed individuals than in non-exposed  
92 individuals for more than a decade after disasters<sup>10 15 16</sup>. Moreover, evidence shows  
93 that such effects are increased if survivors suffer from bereavement<sup>10 12</sup>. Additionally,  
94 the association between earthquakes and depression may vary according to age or  
95 gender. Studies indicate that overall levels of psychological symptoms may vary  
96 among children, adolescents, and adults due to differences in physiology and  
97 cognition<sup>17 18</sup>. In response to disaster, women appear develop more intense and  
98 longer-lasting psychological symptoms than men<sup>13 19</sup>. However, very few of these  
99 studies investigated the long-term effect of earthquakes on depression risk in the  
100 Chinese population.

1  
2  
3 101 Our study provides a suitable setting for investigating the long-term impact of  
4  
5 102 earthquakes on depression in the Chinese population. The Tangshan earthquake,  
6  
7 103 which occurred in 1976, had a magnitude of 7.8 on the Richter scale<sup>20</sup>. The  
8  
9 104 earthquake caused 242,769 deaths and left 164,851 people severely injured,  
10  
11 105 representing the strongest and deadliest natural disaster in the twentieth century<sup>20</sup>.  
12  
13 106 Since the earthquake, numerous studies have examined the effects of the event on  
14  
15 107 physical health outcomes. These studies report increased risks of diabetes,  
16  
17 108 cardiovascular disease, and elevated levels of uric acid among survivors of the  
18  
19 109 Tangshan earthquake even at time points more than 30 years later<sup>21-23</sup>. However, no  
20  
21 110 study to date has examined the long-term effect of the Tangshan earthquake on the  
22  
23 111 risk of depression.  
24  
25  
26 112 The aim of our study was to examine the long-term effect of disaster on depression 37  
27  
28 113 years later. We hypothesized that the earthquake-exposed group would be more likely  
29  
30 114 than the non-exposed group to exhibit depression. Furthermore, we expected that  
31  
32 115 bereaved survivors would be more likely to experience depression than non-bereaved  
33  
34 116 survivors. Considering that age and gender may confound the association between  
35  
36 117 earthquake experience and depression, we also performed an analysis stratified by age  
37  
38 118 and gender.  
39  
40  
41  
42  
43  
44  
45  
46  
47  
48  
49  
50  
51  
52  
53  
54  
55  
56  
57  
58  
59  
60

## 120 **METHODS**

### 121 **Study participants**

122 The participants were selected from the Jidong Cohort, an ongoing community-based  
123 prospective study in Chinese adults<sup>24</sup>. The Jidong community is located in the  
124 Caofeidian district of Tangshan City, which is approximately 60 km from the  
125 epicentre of the Tangshan earthquake. Cluster sampling was used to select

1  
2  
3 126 participants. From July 2013 to August 2014, a total of 9078 residents in the Jidong  
4  
5 127 community were recruited to participate in the cohort. Data regarding demographic  
6  
7 128 and behavioural characteristics, insomnia, cognition, depression, and biochemical  
8  
9 129 indicators have been collected from this cohort at annual follow-ups since 2013<sup>25-27</sup>.  
10  
11 130 These data were collected using a set of self-administered questionnaires (including  
12  
13 131 the Center for Epidemiological Study and Depression Scale (CES-D)) with the  
14  
15 132 assistance of well-trained research nurses during face-to-face interviews. Biomedical  
16  
17 133 variables were collected by physical examinations and laboratory assessments.  
18  
19 134 Research on this cohort originally examined sub-health and later expanded to examine  
20  
21 135 depression, cardiovascular health, cerebrovascular health and other areas<sup>25-28</sup>.  
22  
23 136 In the current study, we excluded 4054 of the 9078 candidate participants according  
24  
25 137 to the following standards: (1) birth date after July 28th, 1976 (n=4053); (2)  
26  
27 138 incomplete information on relevant earthquake experience (n=1); and(3) missing  
28  
29 139 values in the surveys for the CES-D measurement scale (n=0). Missing data for  
30  
31 140 confounding variables (60 income variables) were imputed with their mean values  
32  
33 141 among these participants. Ultimately, a total of 5024 individuals were included in this  
34  
35 142 cross-sectional study. The participants in the Jidong Cohort are subjected to a physical  
36  
37 143 examination annually, which is paid for by the community. Therefore, the response  
38  
39 144 rate was almost 100%(5024/5025).  
40  
41 145 This study was performed according to guidelines from the Declaration of Helsinki  
42  
43 146 and approved by the Ethics Committee of Jidong Oilfield Staff Hospital. All  
44  
45 147 participants provided written informed consent.  
46  
47  
48  
49  
50  
51  
52  
53  
54  
55

#### 56 149 **Assessment of earthquake experience**

57  
58  
59  
60

1  
2  
3 150 The exposure variable of interest was experience with the earthquake. Earthquake  
4  
5 151 experience and related bereavement were collected through a structured questionnaire.  
6  
7 152 These factors were obtained using the following questions: “Were you in the  
8  
9 153 Tangshan earthquake area in 1976?” and “Did you lose any relatives in the  
10  
11 154 earthquake?”<sup>23</sup> According to the answers to these questions, subjects were classified  
12  
13 155 into 3 groups: no earthquake experience, earthquake experience without bereavement,  
14  
15 156 and earthquake experience with bereavement.  
16  
17  
18  
19  
20  
21

### 22 158 **Assessment of current depression**

23  
24 159 Depressive symptoms were assessed using the CES-D, which was initially developed  
25  
26 160 by the United States National Institute of Mental Health in 1977<sup>29</sup>. The Chinese  
27  
28 161 version of the CES-D was translated from the international standard version of the  
29  
30 162 CES-D questionnaire in 1985 by two psychiatrists and was specifically designed to  
31  
32 163 screen for depression<sup>30</sup>. The CES-D questionnaire surveys the frequency of common  
33  
34 164 depressive symptoms over the past week. Each item in the depression assessment  
35  
36 165 section of the questionnaire is scored from 0 (rarely or none of the time, less than one  
37  
38 166 day) to 3 (all of the time, 5–7 days). The four positive statement items (item 4, I felt  
39  
40 167 that I was just as good as other people; item 8, I felt hopeful about the future; item 12,  
41  
42 168 I was happy; item 16, I enjoyed life) are reverse coded to calculate the total score,  
43  
44 169 which ranges from 0 to 60. A cut-off value of  $\geq 16$  has been widely used to define  
45  
46 170 clinically meaningful depressive symptoms<sup>31-33</sup>. All investigators attended a 3-day  
47  
48 171 training course and were licensed before conducting the CES-D interviews.  
49  
50  
51  
52  
53

### 54 172

### 56 173 **Assessment of potential covariates**

57  
58 174 The selected covariates included factors known to be predictive of depression and/or  
59  
60

1  
2  
3 175 potentially correlated with earthquake exposure, including age at the time of the  
4  
5 176 earthquake, gender, education, income, smoking status, drinking status, residence in  
6  
7 177 Tangshan 1-2 years after the earthquake, hypertension, diabetes, and dyslipidaemia.  
8  
9 178 Age at the time of the earthquake was defined as a continuous variable and then a  
10  
11 179 categorical variable (“≤6 years”, “6-18 years”, or “≥18 years”). The average monthly  
12  
13 180 income of each family member was categorized as “<¥3000”, “¥3000–5000” or  
14  
15 181 “>¥5,000”. Educational level was classified into three categories: “illiteracy or  
16  
17 182 primary school,” “middle school or high school,” and “university or above.”  
18  
19 183 Residence in Tangshan 1-2 years after the earthquake was classified as “yes” and “no”.  
20  
21 184 Smoking status was classified as “yes” (current smoker or quit<12 months ago) and  
22  
23 185 “no” (non-smoker or quit>12 months ago).” Drinking status was divided into “yes”  
24  
25 186 (current drinking <1 standard servings/day, <2 standard servings/day, 2-4 standard  
26  
27 187 servings/day, ≥5 standard servings/day) and “no” (never drank, drank in the past). A  
28  
29 188 standard serving was defined as 15 g of ethanol. Systolic blood pressure (SBP) and  
30  
31 189 diastolic blood pressure (DBP) were measured twice using a mercury  
32  
33 190 sphygmomanometer with the subject in a seated position. If the difference between  
34  
35 191 the two measurements exceeded 5 mm Hg, an additional reading was taken, and the  
36  
37 192 average of the three readings was used. Hypertension was defined as having a history  
38  
39 193 of hypertension, exhibiting an SBP ≥140 mm Hg or a DBP ≥90 mm Hg, or using  
40  
41 194 antihypertensive medications. The definition of diabetes mellitus was a fasting  
42  
43 195 glucose level ≥7.0 mmol/l (126 mg/dl), current treatment with insulin/oral  
44  
45 196 hypoglycaemic agents or a history of diabetes mellitus. Dyslipidaemia was defined as  
46  
47 197 a history of hyperlipidaemia, a total blood cholesterol level ≥220 mg/dl, a triglyceride  
48  
49 198 level ≥ 150 mg/dl, or use of anti-hyperlipidaemic medications. All measures in this  
50  
51 199 cross-sectional study reflected the current values as of data collection.  
52  
53  
54  
55  
56  
57  
58  
59  
60

1  
2  
3     200    **Statistical analysis**  
4

5     201    We first compared the characteristics of individuals according to their earthquake and  
6  
7     202    bereavement experiences (no earthquake experience, earthquake experience without  
8  
9     203    bereavement, and earthquake experience with bereavement) using the chi-squared test  
10  
11    204    for categorical variables and one-way ANOVA or the Kruskal–Wallis test for  
12  
13    205    continuous variables.  
14

15  
16  
17    206    We used logistic regression to examine the association between earthquake  
18  
19    207    experience and current depression, with "no earthquake experience" as the reference  
20  
21    208    group. Four multivariate models were fitted as follows: Model 1 was the unadjusted  
22  
23    209    model. Model 2 was adjusted for age at the time of the earthquake and gender. Model  
24  
25    210    3 was further adjusted for smoking status, drinking status, education, income, and  
26  
27    211    residence in Tangshan 1-2 years after the earthquake. Model 4 was further adjusted  
28  
29    212    for hypertension, diabetes, and dyslipidaemia.  
30

31  
32  
33    213    We also used multiple logistic regression to examine the association stratified by  
34  
35    214    gender and age at the time of the earthquake. To evaluate whether the effect of the  
36  
37    215    earthquake on depression would be modified by gender and/or age at the time of the  
38  
39    216    earthquake, we tested the statistical significance of earthquake  $\times$  gender and  
40  
41    217    earthquake  $\times$  age at the time of the earthquake as interaction effects in a  
42  
43    218    multiple-adjustment logistic model by applying a post-estimation Wald test to obtain  
44  
45    219    an omnibus P-value for the interactions between earthquake categories and  
46  
47    220    depression.  
48

49  
50  
51    221    All statistical tests were 2-sided, and results with a P-value $<0.05$  were considered  
52  
53    222    statistically significant. The analyses were performed in SAS version 9.4 (SAS  
54  
55    223    Institute Inc., Cary, NC, USA).  
56

57  
58    224  
59  
60

## 225 **Patient and public involvement**

226 Patients and the public were not involved in the development of the research question  
227 or outcome measures, study design, recruitment, or conduct of the study. The results  
228 will be disseminated to study participants through annual information events.

229

## 230 **RESULTS**

### 231 **Characteristics of the study participants**

232 The characteristics of the participants according to earthquake and bereavement  
233 experiences are shown in Table 1. In total, 5024 participants were included in this  
234 study; the participants were 50.2% male and ranged in age from 37 to 82 years at the  
235 time of data collection. Among all participants, 543 (10.8%) individuals experienced  
236 the earthquake without bereavement, and 98 (2.0%) participants lost relatives. The  
237 individuals who experienced the earthquake with or without bereavement were  
238 younger and were more likely to have lived in Tangshan 1-2 years after the  
239 earthquake than those who had not experienced the earthquake ( $12.1\pm 9.0$ ,  $13.1\pm 9.1$ ,  
240 and  $14.8\pm 9.2$  years, respectively, for age; 86.7%, 79.4%, and 1%, respectively, for  
241 residence). No differences were found in gender, smoking status, drinking status,  
242 education, income, hypertension, diabetes or dyslipidaemia. A higher incidence of  
243 depression was observed in the bereaved and non-bereaved earthquake survivors  
244 (12.2% (12/98) and 7.2% (39/543), respectively) than in those without earthquake  
245 experience (4.9% (215/4383)).

246

### 247 **Association between earthquake experience and depression**

248 Odds ratios (ORs) and 95% confidence intervals (CIs) for the association between  
249 earthquake experience and depression are presented in Table 2. The risk of depression



1  
2  
3 250 in the bereaved subgroup was 2.82 times (OR, 2.82; 95% CI, 1.24-6.39) higher than  
4  
5 251 that in the group with no earthquake experience after adjusting for gender, age at the  
6  
7 252 time of the earthquake, smoking status, drinking status, education, income, residence  
8  
9 253 in Tangshan 1-2 years after the earthquake, hypertension, diabetes, and dyslipidaemia.  
10  
11  
12 254 However, no statistically significant association was found in the non-bereaved group.  
13  
14  
15 255

### 16 256 **Subgroup analysis by gender and age as of the earthquake**

17  
18  
19 257 In the models stratified by gender, the female subjects in both the bereaved (OR, 3.51;  
20  
21 258 95% CI, 1.21-10.16) and non-bereaved (OR, 3.07; 95% CI, 1.44-6.56) subgroups had  
22  
23 259 an increased risk of depression. In contrast, no significant association was found  
24  
25 260 between earthquake experience and the risk of depression among male subjects in  
26  
27 261 either the bereaved (OR, 2.09; 95% CI, 0.58-7.61) or the non-bereaved (OR, 0.84; 95%  
28  
29 262 CI, 0.32-2.20) subgroup. In the models stratified by age at the time of the earthquake,  
30  
31 263 we found a statistically significant association in individuals over 18 years old  
32  
33 264 whether they had lost relatives in the earthquake (OR, 13.16; 95% CI, 3.08-56.3) or  
34  
35 265 not (OR, 3.39; 95% CI, 1.31-8.87). No statistically significant association was found  
36  
37 266 in survivors under 6 years old whether they had been bereaved (OR, 1.65; 95% CI,  
38  
39 267 0.42-6.49) or not (OR, 1.09; 95% CI, 0.36-3.27), and there was also no significant  
40  
41 268 association in survivors aged between 6 and 18 years whether they had lost relatives  
42  
43 269 (OR, 1.11; 95% CI, 0.21-5.99) or not (OR, 1.30; 95% CI, 0.47-3.61). In addition, we  
44  
45 270 found a statistically significant interaction between gender and depression ( $P$  for  
46  
47 271 interaction= 0.02) but no significant interaction between age at the time of the  
48  
49 272 earthquake and depression ( $P$  for interaction= 0.51) (Figure 1).  
50  
51  
52  
53  
54  
55

56 273

### 57 274 **DISCUSSION**

1  
2  
3 275 In this community-based study, we observed that, even after 37 years, earthquake  
4  
5 276 survivors had a higher risk of depression than those who had not experienced the  
6  
7 277 earthquake. In addition, long-term effects of the earthquake on depression were found  
8  
9 278 among bereaved survivors, women and individuals over 18 years old. This study is  
10  
11 279 the first to investigate the association between earthquake experience and depression  
12  
13 280 37 years after an earthquake.  
14  
15

16  
17 281 Evidence shows that traumatic experiences in childhood and adolescence may have a  
18  
19 282 determining effect on brain structural development, sympathetic nervous system  
20  
21 283 responsivity, and the hypothalamic–pituitary–adrenal axis, especially in younger  
22  
23 284 children (preschool) and school-age children (late childhood and early adolescence),  
24  
25 285 resulting in a large stress response and some psychological problems<sup>18</sup>. Therefore, we  
26  
27 286 classified the participants into age categories of 0-6, 6-18 and older than 18 years to  
28  
29 287 investigate the long-term impact of disaster on mental health during different stages  
30  
31 288 of life. However, statistically significant associations were found only in individuals  
32  
33 289 over 18 years of age. One explanation is that different ages have different needs for  
34  
35 290 social networks. Social networking is associated with the onset of depression<sup>34</sup>.  
36  
37 291 Children's and adolescents' social needs are met by parental care and family<sup>35</sup>. Adults,  
38  
39 292 in contrast, need support from social interaction in the neighbourhood, the  
40  
41 293 communities, and the work place in addition to family support<sup>36</sup>. The advent of the  
42  
43 294 earthquake destroyed the previously stable social networks and economic foundation  
44  
45 295 of the community. Social-network destruction may lead to some mental health  
46  
47 296 disorders. Additionally, survivors under 18 years old recover from disaster more  
48  
49 297 easily than older survivors do. Insensitivity to the nature and meaning of disaster  
50  
51 298 trauma<sup>37</sup> and access to mental health intervention in the early post-disaster stages<sup>38</sup>  
52  
53  
54  
55  
56  
57  
58  
59  
60

1  
2  
3 299 may contribute to recovery from psychological problems among child and adolescent  
4  
5 300 survivors.

6  
7 301 With regard to gender, we found a significant association between earthquake  
8  
9 302 experience and depression in women but not in men. Similar results have been found  
10  
11 303 in several previous studies of disaster, indicating that women may be at a higher risk  
12  
13 304 of depression than men when they experienced disasters including large earthquake <sup>13</sup>  
14  
15 305 <sup>19</sup>. Differences in physiology, personality, social role and rumination between women  
16  
17 306 and men might result in this gender difference in the association between depression  
18  
19 307 and disaster<sup>39-43</sup>. The exact causal factors leading to gender differences in long-term  
20  
21 308 effects of earthquakes remains a big challenge for future researches.

22  
23  
24 309 Consistent with our findings, a longitudinal study on the Alexander Kielland oil  
25  
26 310 platform collapse shows that survivors have a higher risk of depression than  
27  
28 311 non-exposed individuals 27 years after the disaster<sup>15</sup>. Similar results are observed in  
29  
30 312 another longitudinal study with 10 years of follow-up, which indicates that survivors  
31  
32 313 of the Piper Alpha oil platform disaster show a long-lasting increase in mental health  
33  
34 314 problems compared with non-exposed individuals<sup>16</sup>. In contrast, two studies indicate  
35  
36 315 that disaster has little long-term effect on depression<sup>13 14</sup>. The inconsistency of the  
37  
38 316 results may be explained by the severity of the disaster. The Tangshan earthquake  
39  
40 317 caused more damage than the Buffalo Creek dam collapse or the Australian bushfire  
41  
42 318 disaster. The earthquake reduced Tangshan to ruins in a few minutes, with  
43  
44 319 approximately 85% of the buildings collapsed and at least 400,000 casualties<sup>20 44</sup>. The  
45  
46 320 earthquake afflicted the survivors with not only the loss of their homes but also, more  
47  
48 321 importantly, the tension and fear brought by the disaster itself, the loss of loved ones,  
49  
50 322 the complete destruction of social networks and a sense of despair <sup>45 46</sup>. During the  
51  
52 323 long-term urban reconstruction process, all these effects of the disaster might lead to  
53  
54  
55  
56  
57  
58  
59  
60

1  
2  
3 324 long-term adverse psychological effects on the survivors. In addition, the Tangshan  
4  
5 325 earthquake broke out at the end of the decade of the Cultural Revolution. The  
6  
7 326 consequences of the Cultural Revolution, which include a fragile economic  
8  
9 327 foundation, low economic compensation, lack of societal acknowledgement, and  
10  
11 328 destruction of the health care service network, may have delayed recovery.  
12  
13  
14 329 The long-term effect of disaster on depression seems to depend on traumatic  
15  
16 330 experience. In our study, a statistically significant association between earthquake  
17  
18 331 experience and depression was observed in bereaved survivors but not in  
19  
20 332 non-bereaved survivors 37 years after the earthquake. This finding was consistent  
21  
22 333 with a longitudinal study carried out in Italy showing that exposure to loss and  
23  
24 334 damage during an earthquake confers an additional risk of negative psychological  
25  
26 335 consequences above and beyond living in the earthquake zone<sup>10</sup>. Similarly, a  
27  
28 336 longitudinal study 14 years after MS Estonia Disaster indicated that non-bereaved  
29  
30 337 survivors recovered from their posttraumatic stress reactions, while little change was  
31  
32 338 found over that period in the reaction of the bereaved<sup>12</sup>. Traumatic bereavement may  
33  
34 339 be associated with increased severity of long-term posttraumatic stress reactions after  
35  
36 340 disasters<sup>47</sup>, which is considered to be involved in the onset of depression<sup>4</sup>.  
37  
38 341 Several plausible explanations may link earthquake exposure to the prevalence of  
39  
40 342 depressive symptoms. Earthquakes can cause tremendous, immediate damage to the  
41  
42 343 environment and even lead to adverse life events such as the death of a family  
43  
44 344 member and related events, thus exerting negative effects on individuals' emotions  
45  
46 345 and resulting in posttraumatic stress disorder (PTSD) after the disaster<sup>4 12</sup>. PTSD, as a  
47  
48 346 frequent comorbidity of depression<sup>48 49</sup>, may persist for decades following disaster<sup>50-52</sup>.  
49  
50 347 These findings suggest that traumatic bereavement might be a common mediating  
51  
52 348 mechanism of both depression and PTSD. The pain of loss in survivors may have  
53  
54  
55  
56  
57  
58  
59  
60

1  
2  
3 349 neurobiological effects on several brain areas (the frontolimbic and striatal areas)<sup>47 53</sup>.

4  
5 350 These areas and the functional connectivity within the fronto-striato-thalamic and  
6  
7  
8 351 default-mode networks have been found to be correlated with the progression of  
9  
10 352 mental health problems and may play important roles in adaptation to trauma<sup>4 54</sup>. The  
11  
12 353 trauma caused by disasters has a variety of mechanisms. Whether PTSD symptoms  
13  
14 354 further transform into depression or other mental illnesses in the long term will  
15  
16  
17 355 require further exploration.

18  
19 356 Gender, age at the time of the earthquake, education, income, smoking, drinking,  
20  
21 357 living in the affected area after a disaster, hypertension, diabetes and dyslipidaemia  
22  
23 358 were controlled in the multiple variable analysis. To avoid over fitting, we used four  
24  
25 359 models to adjust confounding variables step by step. The resulting ORs reflected  
26  
27  
28 360 minor changes in the 4 models, suggesting that earthquake experience may be an  
29  
30 361 independent risk factor for the occurrence of depression.

31  
32  
33 362 Our study has a few limitations. First, substantial time has passed since the earthquake  
34  
35 363 occurred, and we were unable to control for every event or factor. For example, we  
36  
37 364 did not consider other traumatic events, such as traffic accidents, adverse childhood  
38  
39 365 experiences, other bereavement or current psychological stressors, which could have  
40  
41 366 confounded the observed associations. Additionally, the sample was not  
42  
43 367 representative of all survivors of the Tangshan earthquake. We did not include  
44  
45 368 survivors who had died in the past 37 years. Premature death may be related to  
46  
47 369 depression and disease. Meanwhile, in our sample, nearly 20% of the survivors did  
48  
49 370 not live in the earthquake zone 1-2 years after the earthquake. These people left the  
50  
51 371 painful environment and may have worked or attended school elsewhere for several  
52  
53 372 years, which may have largely relieved psychological stress and alleviated the  
54  
55 373 symptoms of depression. Therefore, the potential impacts of the earthquake on  
56  
57  
58  
59  
60

1  
2  
3 374 depression may have been underestimated. Third, whether the subjects were taking  
4  
5 375 antidepressants was unknown. Fourth, the cross-sectional design of this study  
6  
7  
8 376 precludes causal inferences. Finally, depression was assessed only once during the  
9  
10 377 study; therefore, we could not exclude the possibility of reverse causality.  
11  
12 378 The results of our study are very relevant to future research on depression among  
13  
14 379 disaster survivors. For instance, survivors of earthquakes in Japan, Haiti, and China  
15  
16 380 were all affected by high rates of depression in the short term<sup>55-58</sup>. Although the  
17  
18 381 timing and severity of the disasters, the ethnicity of the affected population, and the  
19  
20 382 living environment of the survivors are different, the stressors caused by disasters are  
21  
22 383 similar. Strengthening community social cohesion can facilitate recovery from  
23  
24 384 disaster trauma<sup>59 60</sup>. Clinicians and policymakers in public health should direct  
25  
26 385 additional early social support towards high-risk survivors of disasters, a measure that  
27  
28 386 may reduce the incidence of mental health problems, including depression, in disaster  
29  
30 387 zones<sup>61</sup>, even long after the disaster has passed.  
31  
32  
33  
34  
35  
36  
37  
38  
39

## 389 **CONCLUSIONS**

40 390 Thirty-seven years after the disasters, earthquake experience was associated with  
41  
42 391 depression among bereaved survivors, women and individuals over 18 years old at the  
43  
44 392 time. Our study provides evidence supporting the hypothesis that the effect of an  
45  
46  
47 393 earthquake on depression persists for at least 37 years.  
48  
49  
50  
51  
52  
53  
54  
55  
56  
57  
58  
59  
60

1  
2  
3 **Acknowledgements** We thank all the participants, patient advisers and members of  
4  
5 the survey team in the Jidong community. We also appreciate the help and support we  
6  
7 received from the staff of Ruike Donghua Co., Ltd. During the review period, Yong  
8  
9 Zhou transferred to a different employer; his address was changed accordingly. We  
10  
11 guarantee that all authors have approved the changes in the author list.  
12  
13

14 **Contributors** All authors were involved from the beginning in all phases of the study.  
15  
16 XG, YZ and HPH designed the study. XG and YL analysed the data and prepared the  
17  
18 manuscript. JCY, QHC and BG critiqued the manuscript for important intellectual  
19  
20 content. XG and YCG conducted the statistical analysis. All authors have read and  
21  
22 approved the final version of this manuscript.  
23  
24

25 **Funding** This work was supported by the National Natural Science Foundation (No.  
26  
27 81473057, No.81202279), the National Social Science Fund (No.17BGL184) and the  
28  
29 Non-profit Central Research Institute Fund of Chinese Academy of Medical Sciences  
30  
31 (No.2017PT63009).  
32  
33

34 **Competing interests** None declared.  
35  
36

37 **Ethics approval** The research was approved by the Ethics Committee of Jidong  
38  
39 Oilfield Staff Hospital.  
40  
41

42 **Data sharing statement** All data used or analysed in the current study are available  
43  
44 from the corresponding author upon reasonable request.  
45  
46  
47  
48  
49  
50  
51  
52  
53  
54  
55  
56  
57  
58  
59  
60

**Table 1 Population characteristics according to earthquake experience**

| Characteristics                                 | Overall    | No experience<br>(n=4383) | Experience without<br>bereavement<br>(n=543) | Experience with<br>bereavement<br>(n=98) | <i>P-value</i> |
|-------------------------------------------------|------------|---------------------------|----------------------------------------------|------------------------------------------|----------------|
| Men, n (%)                                      | 2524(50.2) | 2210(50.4)                | 276(50.8)                                    | 38(38.8)                                 | 0.071          |
| Age at the time of the<br>earthquake, mean (SD) | 14.6±9.2   | 14.8±9.2                  | 13.1±9.1                                     | 12.1±9.0                                 | <0.001         |
| ≤6                                              | 1063(21.2) | 880(20.08)                | 146(26.89)                                   | 37(37.76)                                | <0.001         |
| 6-18                                            | 2053(40.9) | 1796(40.98)               | 226(41.62)                                   | 31(31.63)                                |                |
| ≥18                                             | 1908(38.0) | 1707(38.95)               | 171(31.49)                                   | 30(30.61)                                |                |
| Smoking, n (%)                                  | 1286(25.6) | 1136(25.9)                | 132(24.3)                                    | 18(18.4)                                 | 0.182          |
| Drinking, n (%)                                 | 1578(31.4) | 1364(31.1)                | 186(34.3)                                    | 28(28.6)                                 | 0.276          |
| Education, n (%)                                |            |                           |                                              |                                          | 0.689          |
| Illiteracy/primary                              | 318(6.3)   | 279(6.4)                  | 31(5.7)                                      | 8(8.2)                                   |                |



1  
2  
3  
4  
5  
6  
7  
8  
9  
10  
11  
12  
13  
14  
15  
16  
17  
18  
19  
20  
21  
22  
23  
24  
25  
26  
27  
28  
29  
30  
31  
32  
33  
34  
35  
36  
37  
38  
39  
40  
41  
42  
43  
44  
45  
46

|                                                             |            |            |           |          |        |
|-------------------------------------------------------------|------------|------------|-----------|----------|--------|
| Middle school/high school                                   | 2704(53.8) | 2370(54.1) | 282(51.9) | 52(53.1) |        |
| University or above                                         | 2002(39.9) | 1734(39.6) | 230(42.4) | 38(38.8) |        |
| Income, n (%)                                               |            |            |           |          | 0.127  |
| ≤3000                                                       | 2415(48.1) | 2087(47.6) | 270(49.7) | 58(59.2) |        |
| 3001-5000                                                   | 2278(45.3) | 2002(45.7) | 243(44.8) | 33(33.7) |        |
| >5000                                                       | 331(6.6)   | 294(6.7)   | 30(5.5)   | 7(7.1)   |        |
| Residence in Tangshan 1-2 years after the earthquake, n (%) | 561(11.2)  | 45(1.0)    | 431(79.4) | 85(86.7) | <0.001 |
| Hypertension, n (%)                                         | 2158(43.0) | 1872(42.7) | 237(43.7) | 45(45.9) | 0.463  |
| Diabetes, n (%)                                             | 550(11.0)  | 497(11.3)  | 43(7.9)   | 10(10.2) | 0.054  |
| Dyslipidaemia, n (%)                                        | 3102(61.7) | 2696(61.5) | 343(63.2) | 63(64.3) | 0.659  |
| Depression, n (%)                                           | 266(5.3)   | 215(4.9)   | 39(7.2)   | 12(12.2) | 0.001  |

**Table 2. Odds ratios for the association between earthquake experience and depression**

|                | No earthquake experience<br>(n=4383, 87.2%) | Experience without bereavement<br>(n=543, 10.8%) | Experience with bereavement<br>(n=98, 2.0%) |
|----------------|---------------------------------------------|--------------------------------------------------|---------------------------------------------|
| <b>Model 1</b> | 1                                           | 1.42(0.99-2.20)                                  | 2.46(1.32-4.59)                             |
| <b>Model 2</b> | 1                                           | 1.43(1.01-2.04)                                  | 2.50(1.34-4.68)                             |
| <b>Model 3</b> | 1                                           | 1.61 (0.88-2.95)                                 | 2.88 (1.26-6.57)                            |
| <b>Model 4</b> | 1                                           | 1.69(0.93-3.08)                                  | 2.82(1.24-6.39)                             |

Model 1 refers to the unadjusted model.

Model 2 refers to the model adjusted for gender and age at the time of the earthquake.

Model 3 refers to the model adjusted for gender, age at the time of the earthquake, smoking status, drinking status, education, income, and residence in Tangshan 1-2 years after the earthquake.

Model 4 refers to the model adjusted for gender, age at the time of the earthquake, smoking status, drinking status, education, income, residence in Tangshan 1-2 years after the earthquake, hypertension, diabetes, and dyslipidaemia.

1  
2  
3 394 **Figure 1** Odds ratio of depression given earthquake experience, stratified by gender  
4  
5 395 and age at the time of the earthquake.  
6  
7 396 Groups stratified by gender, adjusted for age at the time of the earthquake, smoking  
8  
9 397 status, drinking status, education, income, residence in Tangshan 1-2 years after the  
10  
11 398 earthquake, hypertension, diabetes, and dyslipidaemia. Groups stratified by age at the  
12  
13 399 time of the earthquake, adjusted for gender, smoking status, drinking status, education,  
14  
15 400 income, residence in Tangshan 1-2 years after the earthquake, hypertension, diabetes,  
16  
17 401 and dyslipidaemia.  
18  
19 402  
20  
21  
22  
23  
24 403  
25  
26  
27  
28  
29  
30  
31  
32  
33  
34  
35  
36  
37  
38  
39  
40  
41  
42  
43  
44  
45  
46  
47  
48  
49  
50  
51  
52  
53  
54  
55  
56  
57  
58  
59  
60

405 **REFERENCES**

- 406 1. WHO W, Mathers C, Fat DM, et al. The global burden of disease: 2004  
407 update. *Irish Medical Journal* 2008;106(1):4.
- 408 2. Krishnan V, Nestler EJ. The molecular neurobiology of depression. *Nature*  
409 2008;455(7215):894-902. doi: 10.1038/nature07455 [published Online  
410 First: 2008/10/17]
- 411 3. Guo J, He H, Fu M, et al. Suicidality associated with PTSD, depression,  
412 and disaster recovery status among adult survivors 8 years after the  
413 2008 Wenchuan earthquake in China. *Psychiatry research*  
414 2017;253:383-90. doi: 10.1016/j.psychres.2017.04.022 [published  
415 Online First: 2017/04/25]
- 416 4. Yang L, Zhao Y, Wang Y, et al. The Effects of Psychological Stress on  
417 Depression. *Current neuropharmacology* 2015;13(4):494-504.  
418 [published Online First: 2015/09/29]
- 419 5. Madden JS. Alcohol and depression. *British journal of hospital medicine*  
420 1993;50(5):261-4. [published Online First: 1993/09/01]
- 421 6. Gu L, Xie J, Long J, et al. Epidemiology of major depressive disorder in  
422 mainland china: a systematic review. *PloS one* 2013;8(6):e65356. doi:  
423 10.1371/journal.pone.0065356 [published Online First: 2013/06/21]
- 424 7. Kessler RC, Berglund P, Demler O, et al. The epidemiology of major  
425 depressive disorder: results from the National Comorbidity Survey  
426 Replication (NCS-R). *Jama* 2003;289(23):3095-105. doi:  
427 10.1001/jama.289.23.3095 [published Online First: 2003/06/19]
- 428 8. van Griensven F, Chakkraband ML, Thienkrua W, et al. Mental health  
429 problems among adults in tsunami-affected areas in southern Thailand.  
430 *Jama* 2006;296(5):537-48. doi: 10.1001/jama.296.5.537 [published  
431 Online First: 2006/08/03]
- 432 9. Fergusson DM, Horwood LJ, Boden JM, et al. Impact of a major disaster on  
433 the mental health of a well-studied cohort. *JAMA psychiatry*  
434 2014;71(9):1025-31. doi: 10.1001/jamapsychiatry.2014.652 [published  
435 Online First: 2014/07/17]

- 1  
2  
3  
4 436 10. Bland SH, O'Leary ES, Farinaro E, et al. Long-term psychological effects  
5 437 of natural disasters. *Psychosomatic medicine* 1996;58(1):18-24.  
6  
7 438 [published Online First: 1996/01/01]  
8  
9 439 11. Bryant RA, Creamer M, O'Donnell M, et al. Acute and Chronic  
10  
11 440 Posttraumatic Stress Symptoms in the Emergence of Posttraumatic  
12  
13 441 Stress Disorder: A Network Analysis. *JAMA psychiatry*  
14 442 2017;74(2):135-42. doi: 10.1001/jamapsychiatry.2016.3470 [published  
15  
16 443 Online First: 2016/12/22]  
17  
18 444 12. Arnberg FK, Eriksson NG, Hultman CM, et al. Traumatic bereavement,  
19  
20 445 acute dissociation, and posttraumatic stress: 14 years after the MS  
21  
22 446 Estonia disaster. *J Trauma Stress* 2011;24(2):183-90. doi:  
23  
24 447 10.1002/jts.20629 [published Online First: 2011/03/29]  
25  
26 448 13. Green BL, Grace MC, Vary MG, et al. Children of disaster in the second  
27  
28 449 decade: a 17-year follow-up of Buffalo Creek survivors. *Journal of the*  
29  
30 450 *American Academy of Child and Adolescent Psychiatry*  
31  
32 451 1994;33(1):71-9. doi: 10.1097/00004583-199401000-00011 [published  
33  
34 452 Online First: 1994/01/01]  
35  
36 453 14. McFarlane AC, Van Hooff M. Impact of childhood exposure to a natural  
37  
38 454 disaster on adult mental health: 20-year longitudinal follow-up study.  
39  
40 455 *The British journal of psychiatry : the journal of mental science*  
41  
42 456 2009;195(2):142-8. doi: 10.1192/bjp.bp.108.054270 [published Online  
43  
44 457 First: 2009/08/04]  
45  
46 458 15. Boe HJ, Holgersen KH, Holen A. Mental health outcomes and predictors  
47  
48 459 of chronic disorders after the North Sea oil rig disaster: 27-year  
49  
50 460 longitudinal follow-up study. *The Journal of nervous and mental*  
51  
52 461 *disease* 2011;199(1):49-54. doi: 10.1097/NMD.0b013e31820446a8  
53  
54 462 [published Online First: 2011/01/06]  
55  
56 463 16. Hull AM, Alexander DA, Klein S. Survivors of the Piper Alpha oil platform  
57  
58 464 disaster: long-term follow-up study. *The British journal of psychiatry :*  
59  
60 465 *the journal of mental science* 2002;181:433-8. [published Online First:  
466 2002/11/02]

- 1  
2  
3  
4 467 17. Norris F PJ, Kaniasty K. Individual and Community Responses to Trauma  
5 468 and Disaster: Individual and community reactions to the Kentucky  
6 469 floods: findings from a longitudinal study of older adults. *Cambridge*  
7 470 *University Press* 1994
- 10 471 18. Shaw JA. Children, adolescents and trauma. *The Psychiatric quarterly*  
11 472 2000;71(3):227-43. [published Online First: 2000/08/10]
- 14 473 19. Guo J, He H, Qu Z, et al. Post-traumatic stress disorder and depression  
15 474 among adult survivors 8 years after the 2008 Wenchuan earthquake in  
16 475 China. *Journal of affective disorders* 2017;210:27-34. doi:  
17 476 10.1016/j.jad.2016.12.009 [published Online First: 2016/12/23]
- 21 477 20. Sheng ZY. Medical support in the Tangshan earthquake: a review of the  
22 478 management of mass casualties and certain major injuries. *The*  
23 479 *Journal of trauma* 1987;27(10):1130-5. [published Online First:  
24 480 1987/10/01]
- 28 481 21. An C, Zhang Y, Yu L, et al. Long-term impact of earthquake stress on  
29 482 fasting glucose control and diabetes prevalence among Chinese adults  
30 483 of Tangshan. *International journal of clinical and experimental medicine*  
31 484 2014;7(11):4441-7. [published Online First: 2015/01/01]
- 35 485 22. Ji C, Li Y, Cui L, et al. Prenatal Earthquake Exposure and Midlife Uric Acid  
36 486 Levels Among Chinese Adults. *Arthritis care & research*  
37 487 2017;69(5):703-08. doi: 10.1002/acr.22973 [published Online First:  
38 488 2016/07/28]
- 42 489 23. Li N, Wang Y, Yu L, et al. Long-term effects of earthquake experience of  
43 490 young persons on cardiovascular disease risk factors. *Archives of*  
44 491 *medical science : AMS* 2017;13(1):75-81. doi:  
45 492 10.5114/aoms.2017.64716 [published Online First: 2017/02/02]
- 49 493 24. Guo YC, Zhou Y, Gao X, et al. Association between Nonalcoholic Fatty  
50 494 Liver Disease and Carotid Artery Disease in a Community-Based  
51 495 Chinese Population: A Cross-Sectional Study. *Chinese medical journal*  
52 496 2018;131(19):2269-76. doi: 10.4103/0366-6999.241797 [published  
53 497 Online First: 2018/09/25]

- 1  
2  
3  
4 498 25. Song Q, Liu X, Wang A, et al. Associations between non-traditional lipid  
5 499 measures and risk for type 2 diabetes mellitus in a Chinese community  
6 500 population: a cross-sectional study. *Lipids in health and disease*  
7 501 2016;15:70. doi: 10.1186/s12944-016-0239-y [published Online First:  
8 502 2016/04/06]
- 9  
10  
11  
12 503 26. Hao Z, Zhang Y, Li Y, et al. The Association between Ideal Cardiovascular  
13 504 Health Metrics and Extracranial Carotid Artery Stenosis in a Northern  
14 505 Chinese Population: A Cross-Sectional Study. *Scientific reports*  
15 506 2016;6:31720. doi: 10.1038/srep31720 [published Online First:  
16 507 2016/08/31]
- 17  
18  
19  
20  
21 508 27. Han X, Yang Y, Chen Y, et al. Association between insomnia and atrial  
22 509 fibrillation in a Chinese population: A cross-sectional study. *Clinical*  
23 510 *cardiology* 2017;40(9):765-69. doi: 10.1002/clc.22731 [published  
24 511 Online First: 2017/06/01]
- 25  
26  
27  
28 512 28. Wang Y, Ge S, Yan Y, et al. China suboptimal health cohort study:  
29 513 rationale, design and baseline characteristics. *Journal of translational*  
30 514 *medicine* 2016;14(1):291. doi: 10.1186/s12967-016-1046-y [published  
31 515 Online First: 2016/10/16]
- 32  
33  
34  
35 516 29. Radloff LS. The CES-D Scale. *Applied Psychological Measurement*  
36 517 1977;1(3):385-401.
- 37  
38  
39 518 30. Chien CP, Cheng TA. Depression in Taiwan: epidemiological survey  
40 519 utilizing CES-D. *Seishin shinkeigaku zasshi = Psychiatria et neurologia*  
41 520 *Japonica* 1985;87(5):335-8. [published Online First: 1985/01/01]
- 42  
43  
44 521 31. Zhang Y, Ting RZ, Lam MH, et al. Measuring depression with CES-D in  
45 522 Chinese patients with type 2 diabetes: the validity and its comparison  
46 523 to PHQ-9. *BMC psychiatry* 2015;15:198. doi:  
47 524 10.1186/s12888-015-0580-0 [published Online First: 2015/08/19]
- 48  
49  
50  
51 525 32. Zhang J, Sun W, Kong Y, et al. Reliability and validity of the Center for  
52 526 Epidemiological Studies Depression Scale in 2 special adult samples  
53 527 from rural China. *Comprehensive psychiatry* 2012;53(8):1243-51. doi:  
54 528 10.1016/j.comppsy.2012.03.015 [published Online First: 2012/04/24]
- 55  
56  
57  
58  
59  
60

- 1  
2  
3  
4 529 33. Wang F, Liu J, Liu L, et al. The status and correlates of depression and  
5 530 anxiety among breast-cancer survivors in Eastern China: a  
6 531 population-based, cross-sectional case-control study. *BMC public*  
7 532 *health* 2014;14:326. doi: 10.1186/1471-2458-14-326 [published Online  
8 533 First: 2014/04/09]
- 9 534 34. Rosenquist JN, Fowler JH, Christakis NA. Social network determinants of  
10 535 depression. *Molecular psychiatry* 2011;16(3):273-81. doi:  
11 536 10.1038/mp.2010.13 [published Online First: 2010/03/17]
- 12 537 35. McFarlane AC. Posttraumatic phenomena in a longitudinal study of  
13 538 children following a natural disaster. *Journal of the American Academy*  
14 539 *of Child and Adolescent Psychiatry* 1987;26(5):764-9. doi:  
15 540 10.1097/00004583-198709000-00025 [published Online First:  
16 541 1987/09/01]
- 17 542 36. Bland SH, O'Leary ES, Farinano E, et al. Social network disturbances and  
18 543 psychological distress following earthquake evacuation. *The Journal of*  
19 544 *nervous and mental disease* 1997;185(3):188-94. [published Online  
20 545 First: 1997/03/01]
- 21 546 37. Green BL, Korol M, Grace MC, et al. Children and disaster: age, gender,  
22 547 and parental effects on PTSD symptoms. *Journal of the American*  
23 548 *Academy of Child and Adolescent Psychiatry* 1991;30(6):945-51. doi:  
24 549 10.1097/00004583-199111000-00012 [published Online First:  
25 550 1991/11/01]
- 26 551 38. Wang CW, Chan CL, Ho RT. Prevalence and trajectory of  
27 552 psychopathology among child and adolescent survivors of disasters: a  
28 553 systematic review of epidemiological studies across 1987-2011. *Social*  
29 554 *psychiatry and psychiatric epidemiology* 2013;48(11):1697-720. doi:  
30 555 10.1007/s00127-013-0731-x [published Online First: 2013/07/05]
- 31 556 39. Feingold A. Gender differences in personality: a meta-analysis.  
32 557 *Psychological bulletin* 1994;116(3):429-56. [published Online First:  
33 558 1994/11/01]
- 34 559 40. Christov-Moore L, Simpson EA, Coude G, et al. Empathy: gender effects  
35 560 in brain and behavior. *Neuroscience and biobehavioral reviews*



- 1  
2  
3  
4 561 2014;46 Pt 4:604-27. doi: 10.1016/j.neubiorev.2014.09.001 [published  
5 562 Online First: 2014/09/23]  
6  
7 563 41. Ranasinghe PD, Levy BR. Prevalence of and sex disparities in  
8  
9 564 posttraumatic stress disorder in an internally displaced Sri Lankan  
10  
11 565 population 6 months after the 2004 Tsunami. *Disaster medicine and*  
12  
13 566 *public health preparedness* 2007;1(1):34-41; discussion 41-3. doi:  
14 567 10.1097/DMP.0b013e318068fbb7 [published Online First: 2008/04/05]  
15  
16 568 42. Aksaray G, Kortan G, Erkaya H, et al. Gender differences in psychological  
17  
18 569 effect of the August 1999 earthquake in Turkey. *Nordic journal of*  
19  
20 570 *psychiatry* 2006;60(5):387-91. doi: 10.1080/08039480600937553  
21  
22 571 [published Online First: 2006/10/20]  
23  
24 572 43. Nolen-Hoeksema S, Harrell ZA. Rumination, Depression, and Alcohol  
25  
26 573 Use: Tests of Gender Differences. *Journal of Cognitive Psychotherapy*  
27  
28 574 2002;16(4):-.  
29  
30 575 44. Liu H, Housner GW, Xie L, et al. The Great Tangshan Earthquake of  
31  
32 576 1976. *California Institute of Technology* 2002  
33  
34 577 45. Armenian HK, Morikawa M, Melkonian AK, et al. Loss as a determinant of  
35  
36 578 PTSD in a cohort of adult survivors of the 1988 earthquake in Armenia:  
37  
38 579 implications for policy. *Acta psychiatrica Scandinavica*  
39  
40 580 2000;102(1):58-64. [published Online First: 2000/07/13]  
41  
42 581 46. Carr VJ, Lewin TJ, Webster RA, et al. Psychosocial sequelae of the 1989  
43  
44 582 Newcastle earthquake: II. Exposure and morbidity profiles during the  
45  
46 583 first 2 years post-disaster. *Psychological medicine* 1997;27(1):167-78.  
47  
48 584 [published Online First: 1997/01/01]  
49  
50 585 47. Green BL, Lindy JD, Grace MC, et al. Chronic posttraumatic stress  
51  
52 586 disorder and diagnostic comorbidity in a disaster sample. *The Journal*  
53  
54 587 *of nervous and mental disease* 1992;180(12):760-6. [published Online  
55  
56 588 First: 1992/12/01]  
57  
58 589 48. Breslau N, Davis GC, Peterson EL, et al. A second look at comorbidity in  
59  
60 590 victims of trauma: the posttraumatic stress disorder-major depression  
591  
592 591 connection. *Biological psychiatry* 2000;48(9):902-9. [published Online  
593  
594 592 First: 2000/11/14]

- 1  
2  
3  
4 593 49. Basoglu M, Kilic C, Salcioglu E, et al. Prevalence of posttraumatic stress  
5 594 disorder and comorbid depression in earthquake survivors in Turkey:  
6 595 an epidemiological study. *Journal of traumatic stress*  
7 596 2004;17(2):133-41. doi: 10.1023/B:JOTS.0000022619.31615.e8  
8  
9 597 [published Online First: 2004/05/15]  
10  
11 598 50. Marshall GN, Schell TL, Elliott MN, et al. Mental health of Cambodian  
12 599 refugees 2 decades after resettlement in the United States. *Jama*  
13 600 2005;294(5):571-9. doi: 10.1001/jama.294.5.571 [published Online  
14 601 First: 2005/08/04]  
15  
16 602 51. Goenjian AK, Khachadourian V, Armenian H, et al. Posttraumatic Stress  
17 603 Disorder 23 Years After the 1988 Spitak Earthquake in Armenia.  
18 604 *Journal of traumatic stress* 2018;31(1):47-56. doi: 10.1002/jts.22260  
19 605 [published Online First: 2018/03/08]  
20  
21 606 52. Morgan L, Scourfield J, Williams D, et al. The Aberfan disaster: 33-year  
22 607 follow-up of survivors. *The British journal of psychiatry : the journal of*  
23 608 *mental science* 2003;182:532-6. [published Online First: 2003/06/05]  
24  
25 609 53. McFarlane AC. The prevalence and longitudinal course of PTSD.  
26 610 Implications for the neurobiological models of PTSD. *Annals of the*  
27 611 *New York Academy of Sciences* 1997;821:10-23. [published Online  
28 612 First: 1997/06/21]  
29  
30 613 54. Long J, Huang X, Liao Y, et al. Prediction of post-earthquake depressive  
31 614 and anxiety symptoms: a longitudinal resting-state fMRI study.  
32 615 *Scientific reports* 2014;4:6423. doi: 10.1038/srep06423 [published  
33 616 Online First: 2014/09/23]  
34  
35 617 55. Guo J, Wu P, Tian D, et al. Post-traumatic stress disorder among adult  
36 618 survivors of the Wenchuan earthquake in China: a repeated  
37 619 cross-sectional study. *J Anxiety Disord* 2014;28(1):75-82. doi:  
38 620 10.1016/j.janxdis.2013.12.001 [published Online First: 2014/01/07]  
39  
40 621 56. Ye Y, Fan F, Li L, et al. Trajectory and predictors of depressive symptoms  
41 622 among adolescent survivors following the Wenchuan earthquake in  
42 623 China: a cohort study. *Social psychiatry and psychiatric epidemiology*

- 1  
2  
3  
4 624 2014;49(6):943-52. doi: 10.1007/s00127-014-0821-4 [published Online  
5 625 First: 2014/01/17]  
6  
7 626 57. Matsubara C, Murakami H, Imai K, et al. Prevalence and risk factors for  
8  
9 627 depressive reaction among resident survivors after the tsunami  
10 628 following the Great East Japan Earthquake, March 11, 2011. *PloS one*  
11 629 2014;9(10):e109240. doi: 10.1371/journal.pone.0109240 [published  
12 630 Online First: 2014/10/04]  
13  
14 631 58. Cerda M, Paczkowski M, Galea S, et al. Psychopathology in the aftermath  
15 632 of the Haiti earthquake: a population-based study of posttraumatic  
16 633 stress disorder and major depression. *Depression and anxiety*  
17 634 2013;30(5):413-24. doi: 10.1002/da.22007 [published Online First:  
18 635 2012/11/06]  
19  
20 636 59. Hikichi H, Aida J, Tsuboya T, et al. Can Community Social Cohesion  
21 637 Prevent Posttraumatic Stress Disorder in the Aftermath of a Disaster?  
22 638 A Natural Experiment From the 2011 Tohoku Earthquake and  
23 639 Tsunami. *Am J Epidemiol* 2016;183(10):902-10. doi:  
24 640 10.1093/aje/kwv335 [published Online First: 2016/03/31]  
25  
26 641 60. North CS, Pfefferbaum B. Mental health response to community disasters:  
27 642 a systematic review. *Jama* 2013;310(5):507.  
28  
29 643 61. Salcioglu E, Basoglu M. Psychological effects of earthquakes in children:  
30 644 prospects for brief behavioral treatment. *World journal of pediatrics :*  
31 645 *WJP* 2008;4(3):165-72. doi: 10.1007/s12519-008-0032-8 [published  
32 646 Online First: 2008/10/01]  
33  
34  
35  
36  
37  
38  
39  
40  
41  
42  
43  
44 647  
45  
46  
47  
48  
49  
50  
51  
52  
53  
54  
55  
56  
57  
58  
59  
60

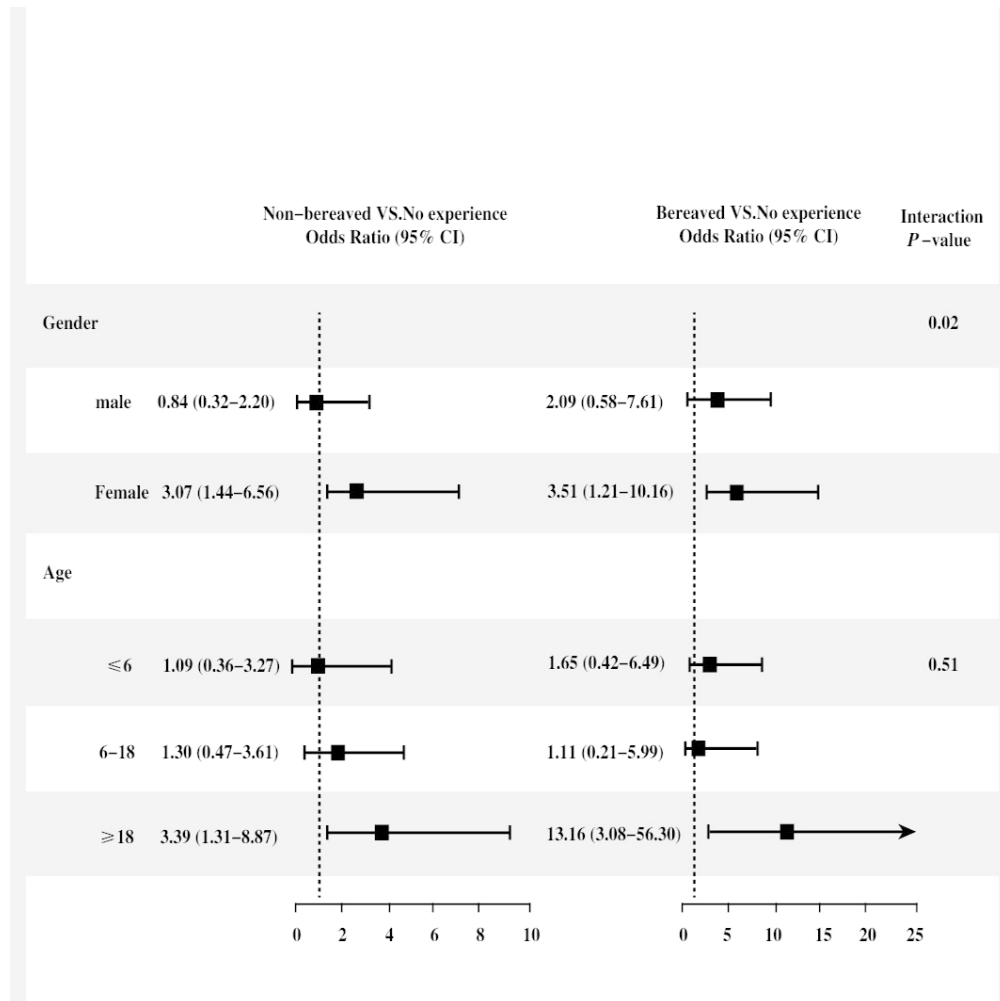

Figure 1 Odds ratio of depression given earthquake experience, stratified by gender and age at the time of the earthquake.

Groups stratified by gender, adjusted for age at the time of the earthquake, smoking status, drinking status, education, income, residence in Tangshan 1-2 years after the earthquake, hypertension, diabetes, and dyslipidaemia. Groups stratified by age at the time of the earthquake, adjusted for gender, smoking status, drinking status, education, income, residence in Tangshan 1-2 years after the earthquake, hypertension, diabetes, and dyslipidaemia.

90x90mm (300 x 300 DPI)

STROBE Statement—checklist of items that should be included in reports of observational studies

|                           | Item No. | Recommendation                                                                                                                                                                                                                                                                                                                                                                                                                                                         | Page No. | Relevant text from manuscript |
|---------------------------|----------|------------------------------------------------------------------------------------------------------------------------------------------------------------------------------------------------------------------------------------------------------------------------------------------------------------------------------------------------------------------------------------------------------------------------------------------------------------------------|----------|-------------------------------|
| <b>Title and abstract</b> | 1        | (a) Indicate the study’s design with a commonly used term in the title or the abstract                                                                                                                                                                                                                                                                                                                                                                                 | 1        | Line 1-2                      |
|                           |          | (b) Provide in the abstract an informative and balanced summary of what was done and what was found                                                                                                                                                                                                                                                                                                                                                                    | 3-4      | Line 36-65                    |
| <b>Introduction</b>       |          |                                                                                                                                                                                                                                                                                                                                                                                                                                                                        |          |                               |
| Background/rationale      | 2        | Explain the scientific background and rationale for the investigation being reported                                                                                                                                                                                                                                                                                                                                                                                   | 6-7      | Line 77-111                   |
| Objectives                | 3        | State specific objectives, including any prespecified hypotheses                                                                                                                                                                                                                                                                                                                                                                                                       | 7        | Line 112-118                  |
| <b>Methods</b>            |          |                                                                                                                                                                                                                                                                                                                                                                                                                                                                        |          |                               |
| Study design              | 4        | Present key elements of study design early in the paper                                                                                                                                                                                                                                                                                                                                                                                                                | 8        | Line 142                      |
| Setting                   | 5        | Describe the setting, locations, and relevant dates, including periods of recruitment, exposure, follow-up, and data collection                                                                                                                                                                                                                                                                                                                                        | 7-8      | Line 122-135                  |
| Participants              | 6        | (a) <i>Cohort study</i> —Give the eligibility criteria, and the sources and methods of selection of participants. Describe methods of follow-up<br><i>Case-control study</i> —Give the eligibility criteria, and the sources and methods of case ascertainment and control selection. Give the rationale for the choice of cases and controls<br><i>Cross-sectional study</i> —Give the eligibility criteria, and the sources and methods of selection of participants | 8        | Line 137-144                  |
|                           |          | (b) <i>Cohort study</i> —For matched studies, give matching criteria and number of exposed and unexposed<br><i>Case-control study</i> —For matched studies, give matching criteria and the number of controls per case                                                                                                                                                                                                                                                 |          |                               |
| Variables                 | 7        | Clearly define all outcomes, exposures, predictors, potential confounders, and effect modifiers. Give diagnostic criteria, if applicable                                                                                                                                                                                                                                                                                                                               | 8-10     | Line 150-199                  |
| Data sources/measurement  | 8*       | For each variable of interest, give sources of data and details of methods of assessment (measurement). Describe comparability of assessment methods if there is more than one group                                                                                                                                                                                                                                                                                   | 8-9      | Line 150-171                  |
| Bias                      | 9        | Describe any efforts to address potential sources of bias                                                                                                                                                                                                                                                                                                                                                                                                              | 11       | Line 206-212                  |
| Study size                | 10       | Explain how the study size was arrived at                                                                                                                                                                                                                                                                                                                                                                                                                              | 8        | Line 137-144                  |

Continued on next page

|                        |     |                                                                                                                                                                                                                                                                                                           |       |                       |
|------------------------|-----|-----------------------------------------------------------------------------------------------------------------------------------------------------------------------------------------------------------------------------------------------------------------------------------------------------------|-------|-----------------------|
| Quantitative variables | 11  | Explain how quantitative variables were handled in the analyses. If applicable, describe which groupings were chosen and why                                                                                                                                                                              | 11    | Line 204-205          |
| Statistical methods    | 12  | (a) Describe all statistical methods, including those used to control for confounding                                                                                                                                                                                                                     | 11    | Line 201-223          |
|                        |     | (b) Describe any methods used to examine subgroups and interactions                                                                                                                                                                                                                                       | 11    | Line 213-220          |
|                        |     | (c) Explain how missing data were addressed                                                                                                                                                                                                                                                               | 8     | Line 139-142          |
|                        |     | (d) <i>Cohort study</i> —If applicable, explain how loss to follow-up was addressed<br><i>Case-control study</i> —If applicable, explain how matching of cases and controls was addressed<br><i>Cross-sectional study</i> —If applicable, describe analytical methods taking account of sampling strategy | 7-8   | Line 125-126          |
|                        |     | (e) Describe any sensitivity analyses                                                                                                                                                                                                                                                                     |       | NA                    |
| <b>Results</b>         |     |                                                                                                                                                                                                                                                                                                           |       |                       |
| Participants           | 13* | (a) Report numbers of individuals at each stage of study—eg numbers potentially eligible, examined for eligibility, confirmed eligible, included in the study, completing follow-up, and analysed                                                                                                         | 12    | Line 233-236          |
|                        |     | (b) Give reasons for non-participation at each stage                                                                                                                                                                                                                                                      | 8     | Line 137-141          |
|                        |     | (c) Consider use of a flow diagram                                                                                                                                                                                                                                                                        |       | NA                    |
| Descriptive data       | 14* | (a) Give characteristics of study participants (eg demographic, clinical, social) and information on exposures and potential confounders                                                                                                                                                                  | 12    | Line 232-245, Table 1 |
|                        |     | (b) Indicate number of participants with missing data for each variable of interest                                                                                                                                                                                                                       | 8     | Line 139-142          |
|                        |     | (c) <i>Cohort study</i> —Summarise follow-up time (eg, average and total amount)                                                                                                                                                                                                                          |       | NA                    |
| Outcome data           | 15* | <i>Cohort study</i> —Report numbers of outcome events or summary measures over time<br><i>Case-control study</i> —Report numbers in each exposure category, or summary measures of exposure<br><i>Cross-sectional study</i> —Report numbers of outcome events or summary measures                         | 12    | Line 242-245          |
|                        |     | (a) Give unadjusted estimates and, if applicable, confounder-adjusted estimates and their precision (eg, 95% confidence interval). Make clear which confounders were adjusted for and why they were included                                                                                              | 12-13 | Line 248-254, Table 2 |
|                        |     | (b) Report category boundaries when continuous variables were categorized                                                                                                                                                                                                                                 | 10    | Line 179-181, Table 1 |
| Main results           | 16  | (c) If relevant, consider translating estimates of relative risk into absolute risk for a meaningful time period                                                                                                                                                                                          |       | NA                    |

Continued on next page

|                          |    |                                                                                                                                                                            |       |              |
|--------------------------|----|----------------------------------------------------------------------------------------------------------------------------------------------------------------------------|-------|--------------|
| Other analyses           | 17 | Report other analyses done—eg analyses of subgroups and interactions, and sensitivity analyses                                                                             | 13    | Line 257-272 |
| <b>Discussion</b>        |    |                                                                                                                                                                            |       |              |
| Key results              | 18 | Summarise key results with reference to study objectives                                                                                                                   | 14    | Line 275-280 |
| Limitations              | 19 | Discuss limitations of the study, taking into account sources of potential bias or imprecision. Discuss both direction and magnitude of any potential bias                 | 17    | Line 362-377 |
| Interpretation           | 20 | Give a cautious overall interpretation of results considering objectives, limitations, multiplicity of analyses, results from similar studies, and other relevant evidence | 14-18 | Line 281-387 |
| Generalisability         | 21 | Discuss the generalisability (external validity) of the study results                                                                                                      | 17-18 | Line 366-374 |
| <b>Other information</b> |    |                                                                                                                                                                            |       |              |
| Funding                  | 22 | Give the source of funding and the role of the funders for the present study and, if applicable, for the original study on which the present article is based              | 19    | Line 404-407 |

\*Give information separately for cases and controls in case-control studies and, if applicable, for exposed and unexposed groups in cohort and cross-sectional studies.

**Note:** An Explanation and Elaboration article discusses each checklist item and gives methodological background and published examples of transparent reporting. The STROBE checklist is best used in conjunction with this article (freely available on the Web sites of PLoS Medicine at <http://www.plosmedicine.org/>, Annals of Internal Medicine at <http://www.annals.org/>, and Epidemiology at <http://www.epidem.com/>). Information on the STROBE Initiative is available at [www.strobe-statement.org](http://www.strobe-statement.org).
